# Supplementary material
Source: PubMed Central journal article supplement (PMC9880764)

## **Prevalence of mental health symptoms in children and adolescents during the COVID-19 pandemic: A meta-analysis**

**Supplementary Figures S1-S18:** Additional figures  
(Figures for overall meta-analyses, notable subgroup analyses, and funnel plots)

**Figure S1:** Forest plot for the prevalence pooling of depressive symptoms

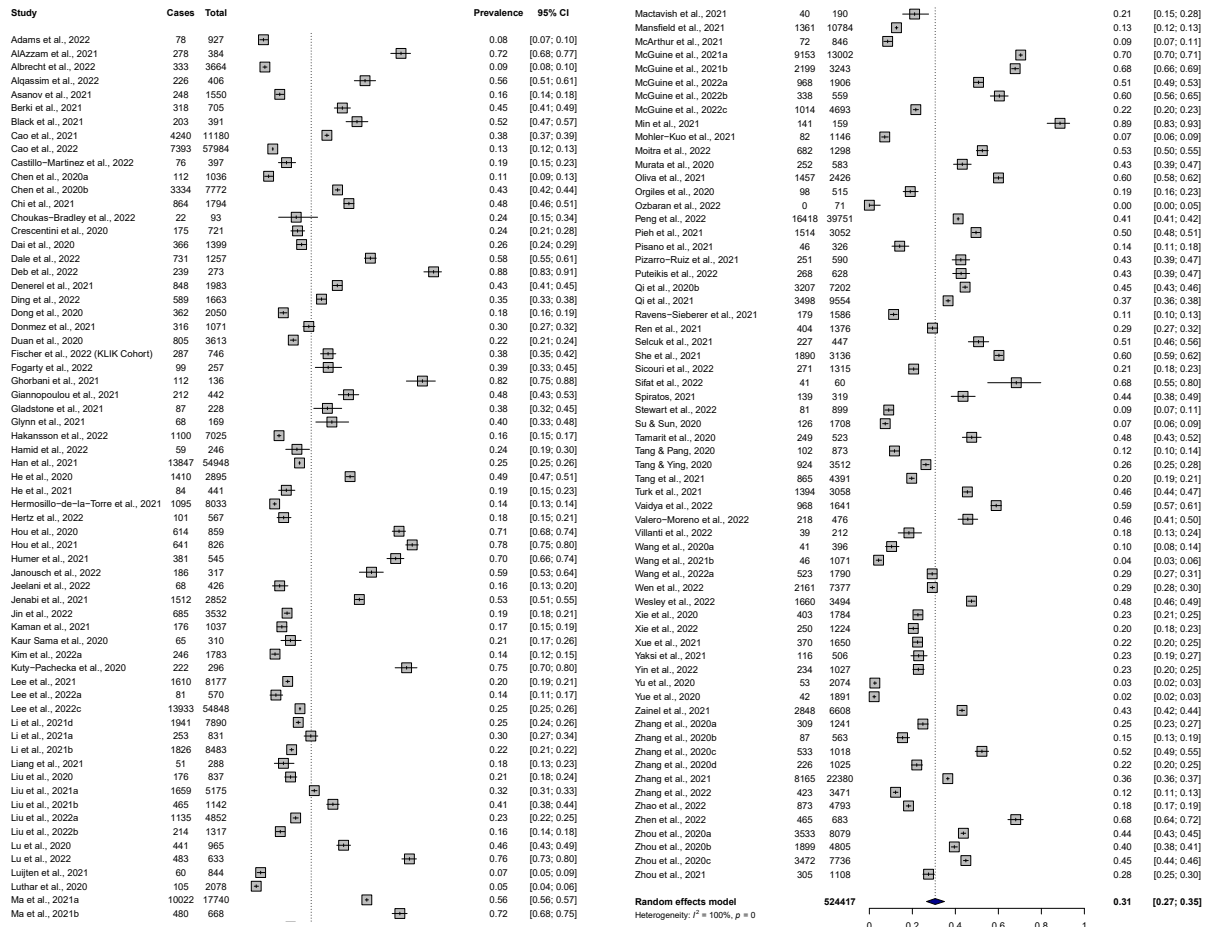

**Figure S2:** Forest plot for the subgroup analysis of depressive symptoms by screening tools and threshold values

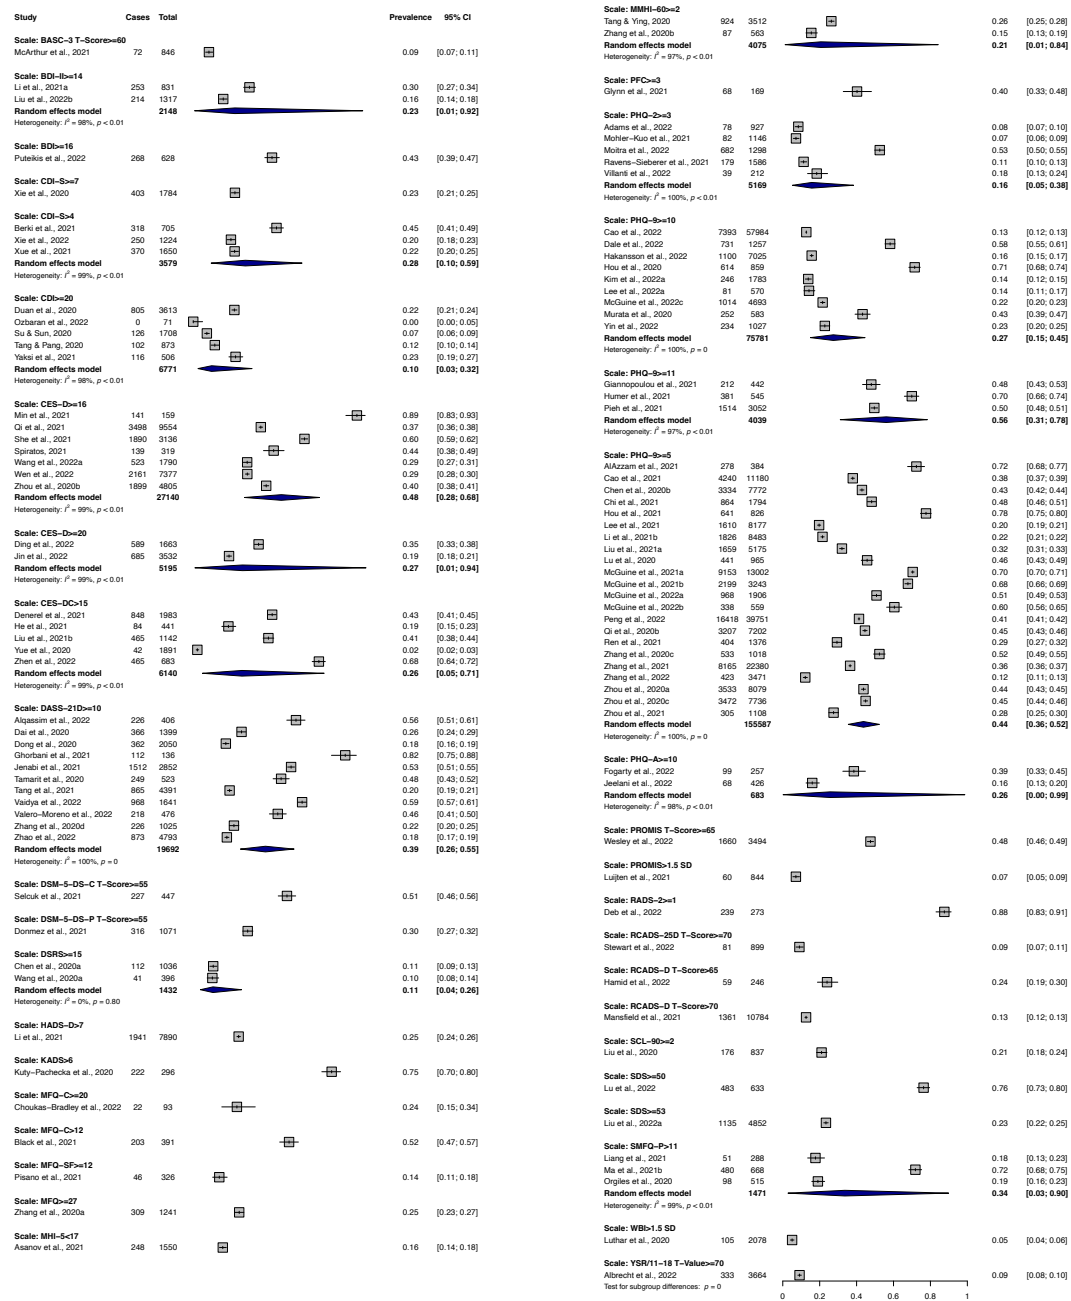

**Abbreviations:** **BASC-3** Behavior Assessment System for Children, 3<sup>rd</sup> Edition; **BDI-II** Beck Depression Inventory-II; **BDI** Beck Depression Inventory; **CDI-S** Children's Depression Inventory-Short Version; **CDI** Children's Depression Inventory; **CES-D** Center for Epidemiologic Studies Depression Scale; **DASS-21D** Depression, Anxiety, and Stress Scale-21 Items, Depression Subscale; **DSM-5-DS-C** Diagnostic and Statistical Manual of Mental Disorders, 5<sup>th</sup> Edition, Level 2 Depression Scale for Children Aged 11-17; **DSM-5-DS-P** Diagnostic and Statistical Manual of Mental Disorders, 5<sup>th</sup> Edition, Level 2 Depression Scale for Parents of Child; **DSRS** Depression Self-Rating Scale; **KADS** 11-Items Kutcher Adolescent Depression Scale; **MFQ-C** Mood and Feelings Questionnaire for Children; **MFQ-SF** Mood and Feelings Questionnaire-Short Form; **MFQ** Mood and Feelings Questionnaire; **MMHI-60** Mental Health Inventory of Middle School Students; **PFC** Preschool Feelings Checklist; **PHQ-2** Patient Health Questionnaire-2; **PHQ-9** Patient Health Questionnaire-9; **PHQ-A** Patient Health Questionnaire Modified for Adolescents; **PROMIS** Patient Reported Outcomes Measurement Information System; **RCADS-25D** Revised Children's Anxiety and Depression Scale-25 Items, Depression Subscale; **RCADS-D** Revised Children's Anxiety and Depression Scale, Depression Subscale; **SCL-90** Symptom Checklist-90; **SDS** Self-Rating Depression Scale; **SMFQ-P** Short Mood and Feelings Questionnaire-Parent Version; **YSR/11-18** Youth Self-Report for Ages 11-18; **MHI-5** Mental Health Inventory-5; **RADS-2** Reynolds Adolescent Depression Scale, 2<sup>nd</sup> Edition; **HADS** Hospital Anxiety and Depression Scale; **WBI** Well-Being Inventory.

**Figure S3:** Funnel plot for the meta-analysis of depressive symptom prevalence

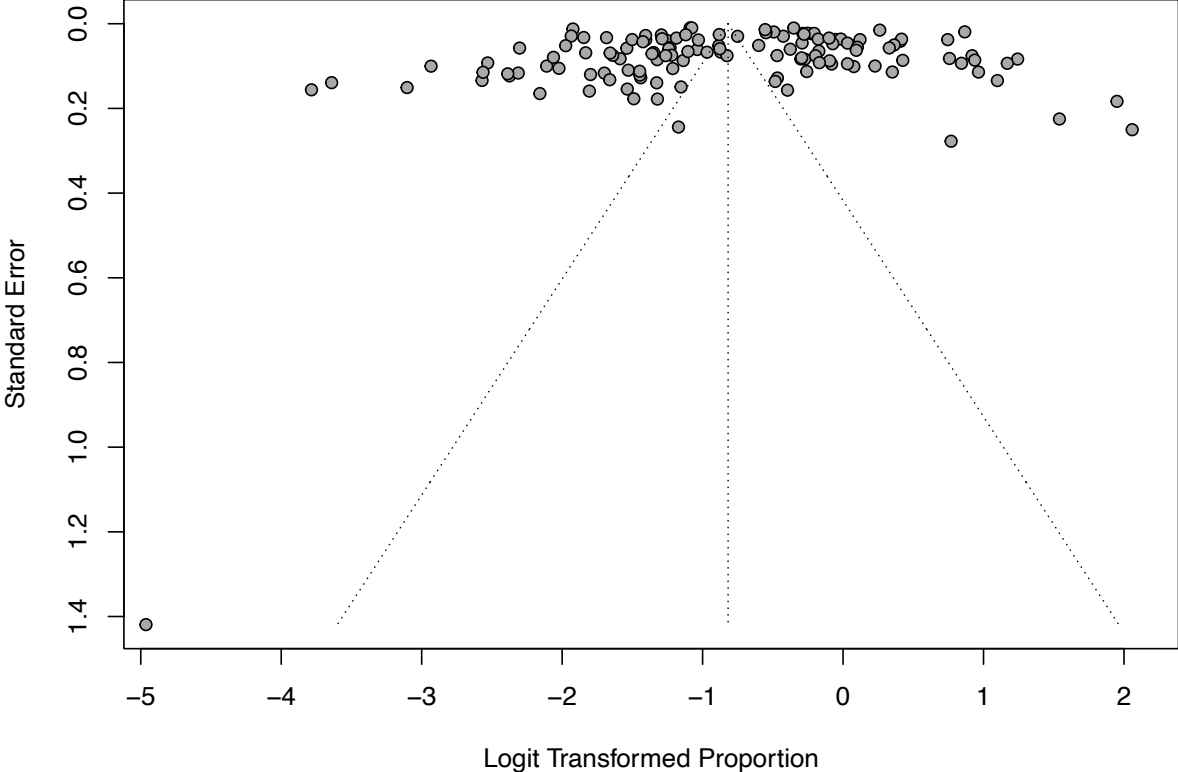

**Figure S4:** Forest plot for the prevalence pooling of anxiety symptoms

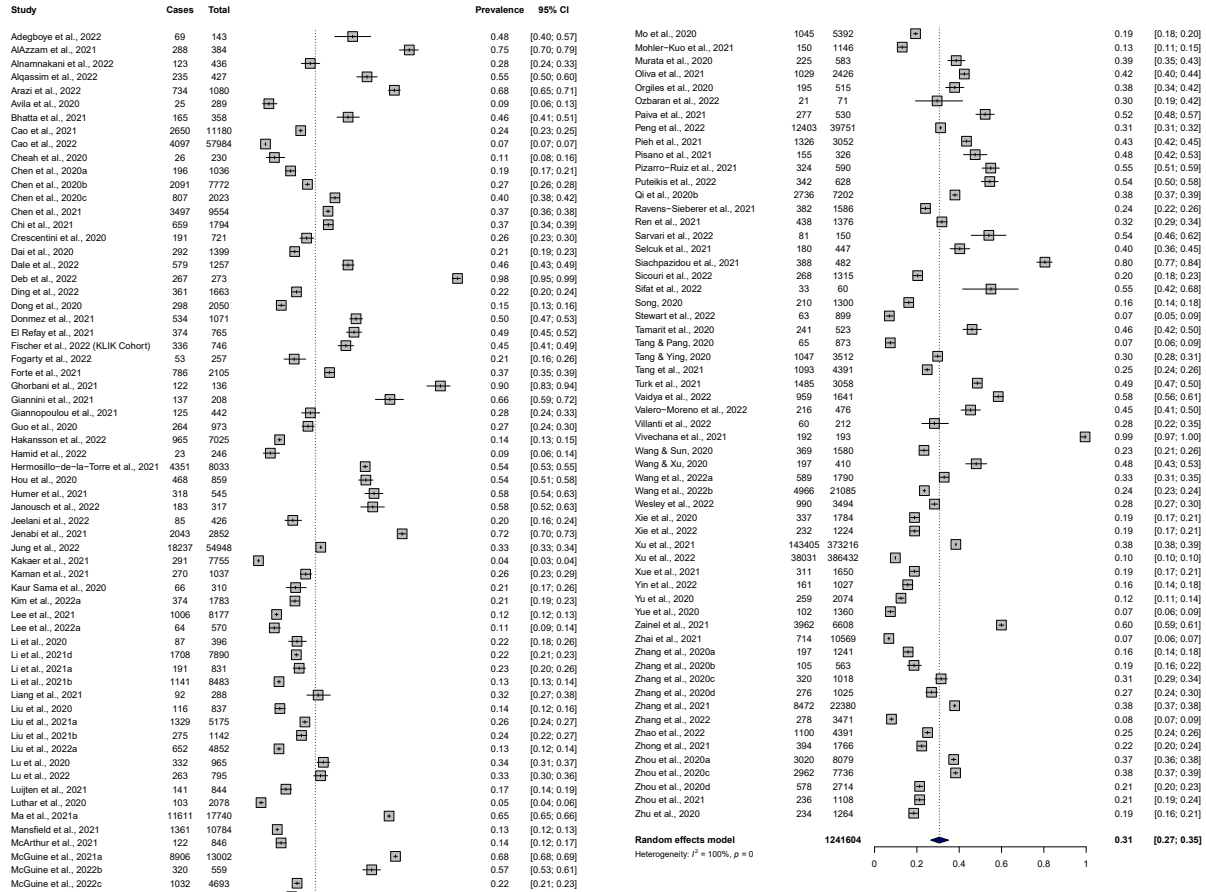

**Figure S5:** Forest plot for the subgroup analysis of anxiety symptoms by screening tools and threshold values

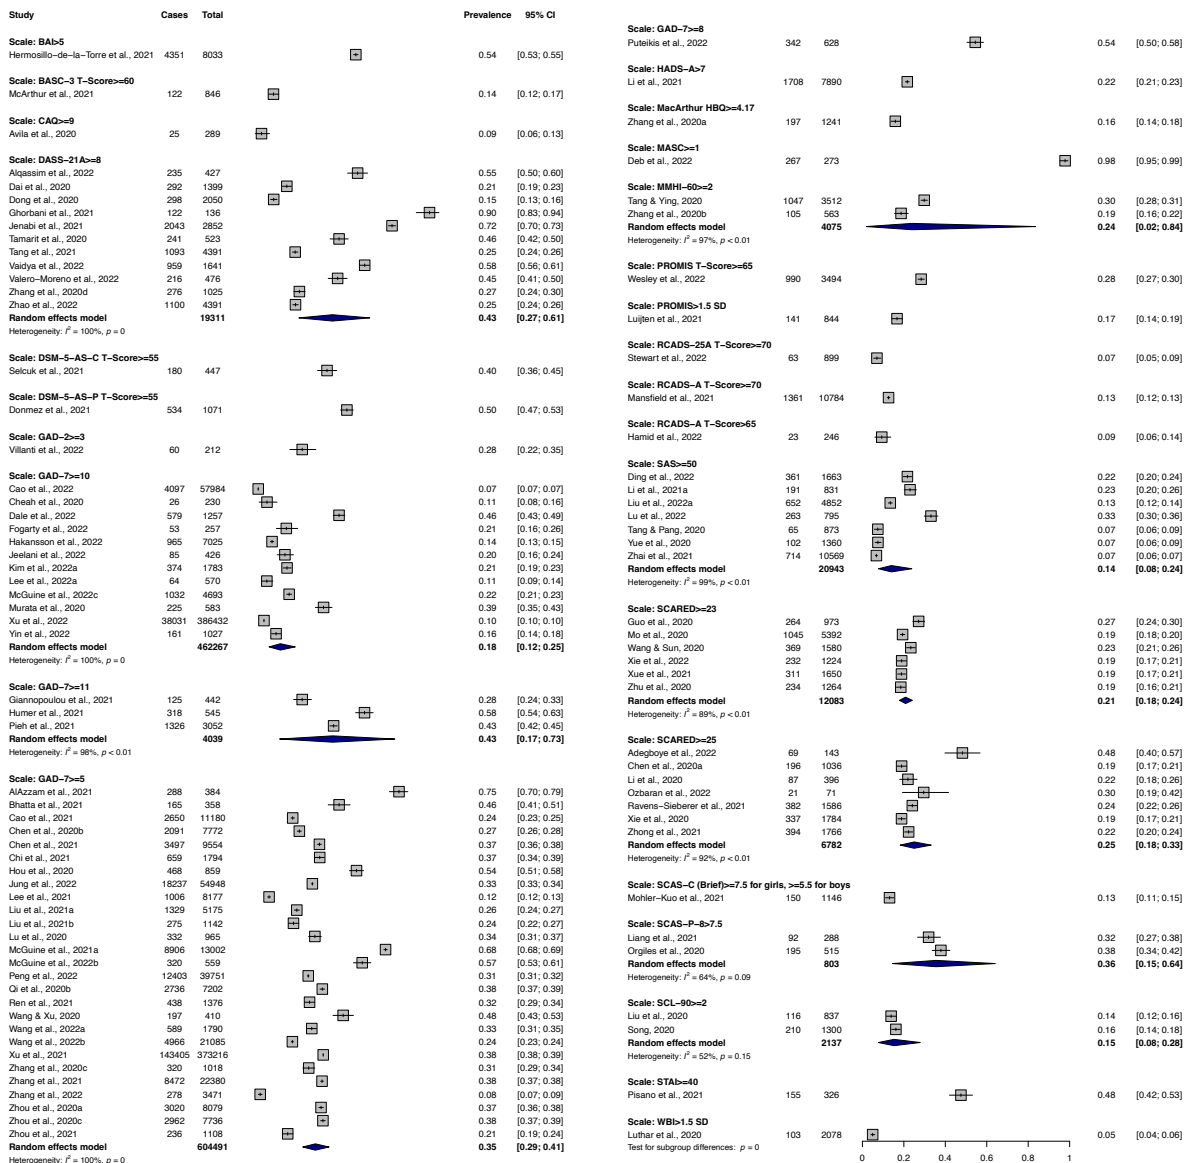

**Abbreviations:** BAI Beck Anxiety Inventory; BASC-3 Behavior Assessment System for Children, 3<sup>rd</sup> Edition; CAQ Children's Anxiety Questionnaire; DASS-21A Depression, Anxiety, and Stress Scale-21 Items, Anxiety Subscale; DSM-5-AS-C Diagnostic and Statistical Manual of Mental Disorders, 5<sup>th</sup> Edition, Level 2 Anxiety Scale for Children Aged 11-17; DSM-5-AS-P Diagnostic and Statistical Manual of Mental Disorders, 5<sup>th</sup> Edition, Level 2 Anxiety Scale for Parents of Child; GAD-2 Generalized Anxiety Disorder-2; GAD-7 Generalized Anxiety Disorder-7; MacArthur HBQ McArthur Health and Behavior Questionnaire; MMHI-60 Mental Health Inventory of Middle School Students; PROMIS Patient Reported Outcomes Measurement Information System; RCADS-25A Revised Children's Anxiety and Depression Scale-25 Items, Anxiety Subscale; RCADS-A Revised Children's Anxiety and Depression Scale, Anxiety Subscale; SAS Self-Rating Anxiety Scale; SCARED Screen for Child Anxiety Related Disorders; SCAS-C Spence Children's Anxiety Scale-Child Version; SCAS-P Spence Children's Anxiety Scale-Parent Version; SCL-90 Symptom Checklist-90; STAI State-Trait Anxiety Inventory; MASC Multidimensional Anxiety Scale for Children; HADS Hospital Anxiety and Depression Scale; WBI Well-Being Inventory.

**Figure S6:** Funnel plot for the meta-analysis of anxiety symptom prevalence

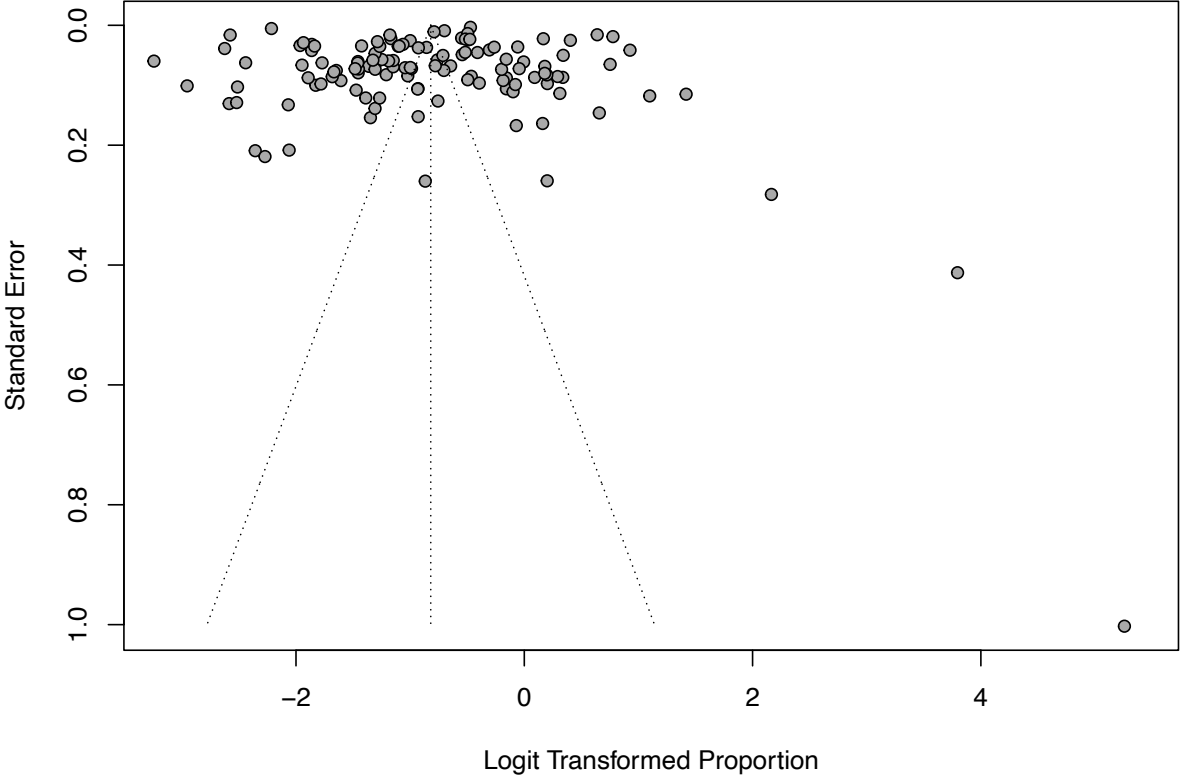

**Figure S7:** Forest plot for the prevalence pooling of sleep disturbances

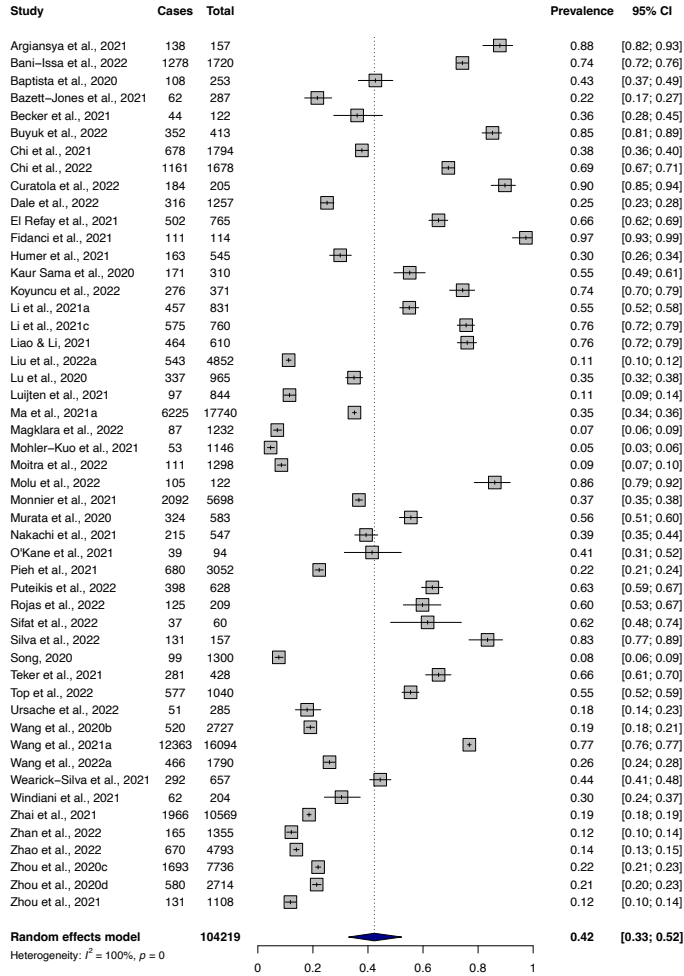



**Figure S8:** Funnel plot for the meta-analysis of sleep disturbance prevalence

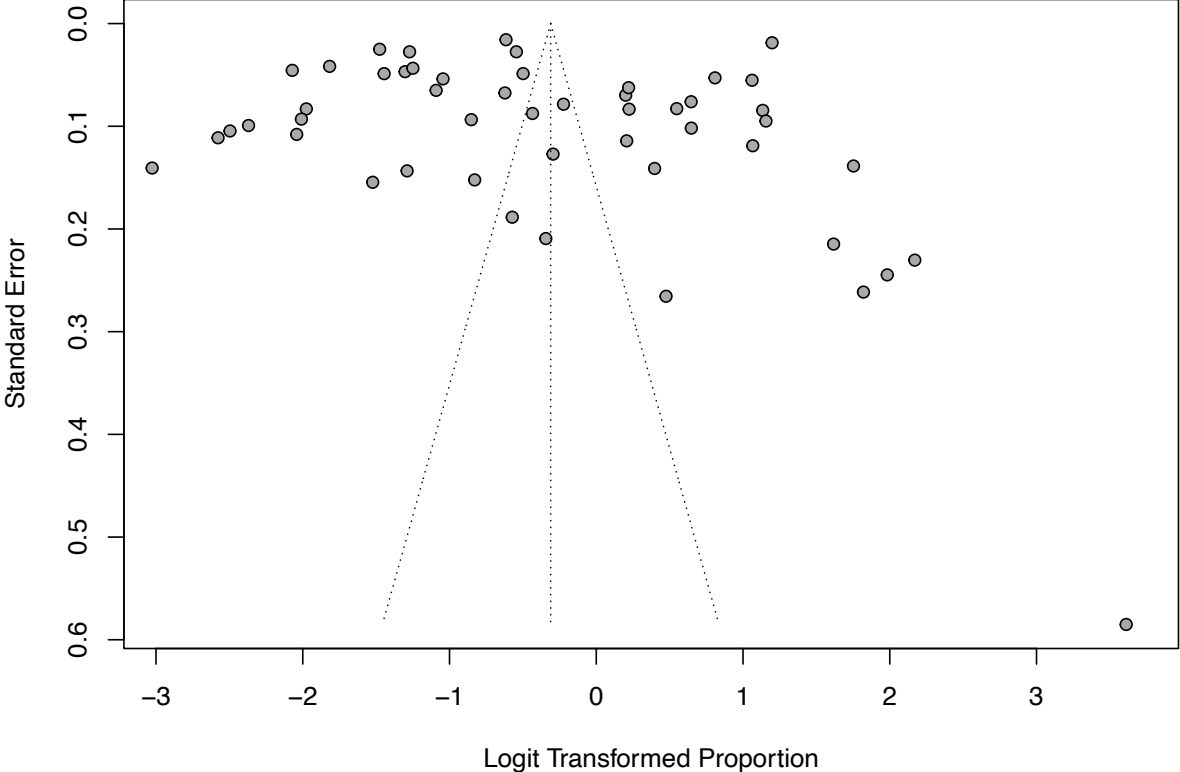

**Figure S9:** Forest plot for the subgroup analysis of sleep disturbances by screening tools and threshold values

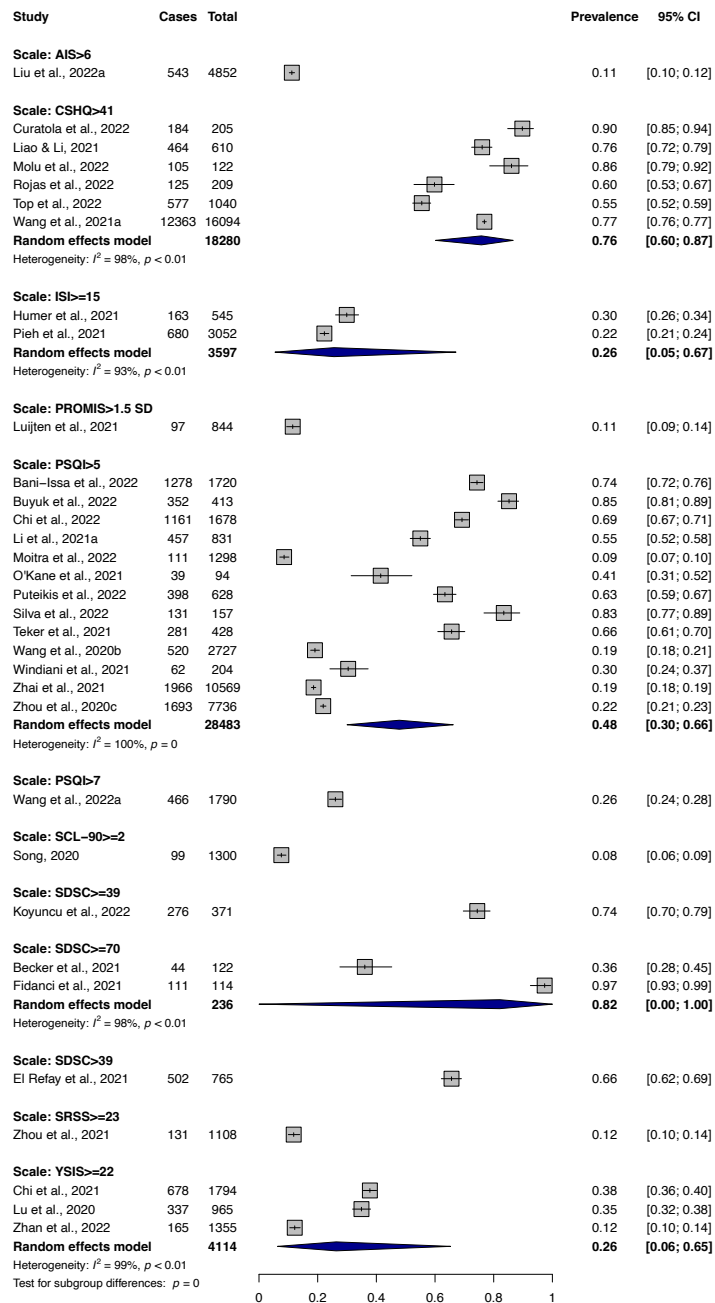

**Abbreviations:** AIS Athens Insomnia Scale; CSHQ Children's Sleep Habits Questionnaire; ISI Insomnia Severity Index; PROMIS Patient Reported Outcomes Measurement Information System; PSQI Pittsburgh Sleep Quality Index; SCL-90 Symptom Checklist-90; SDSC Sleep Disturbance Scale for Children; SRSS Self-Rating Scale of Sleep; YSIS Youth Self-Rating Insomnia Scale

**Figure S10:** Forest plot for the subgroup analysis of depressive symptoms by geographical regions

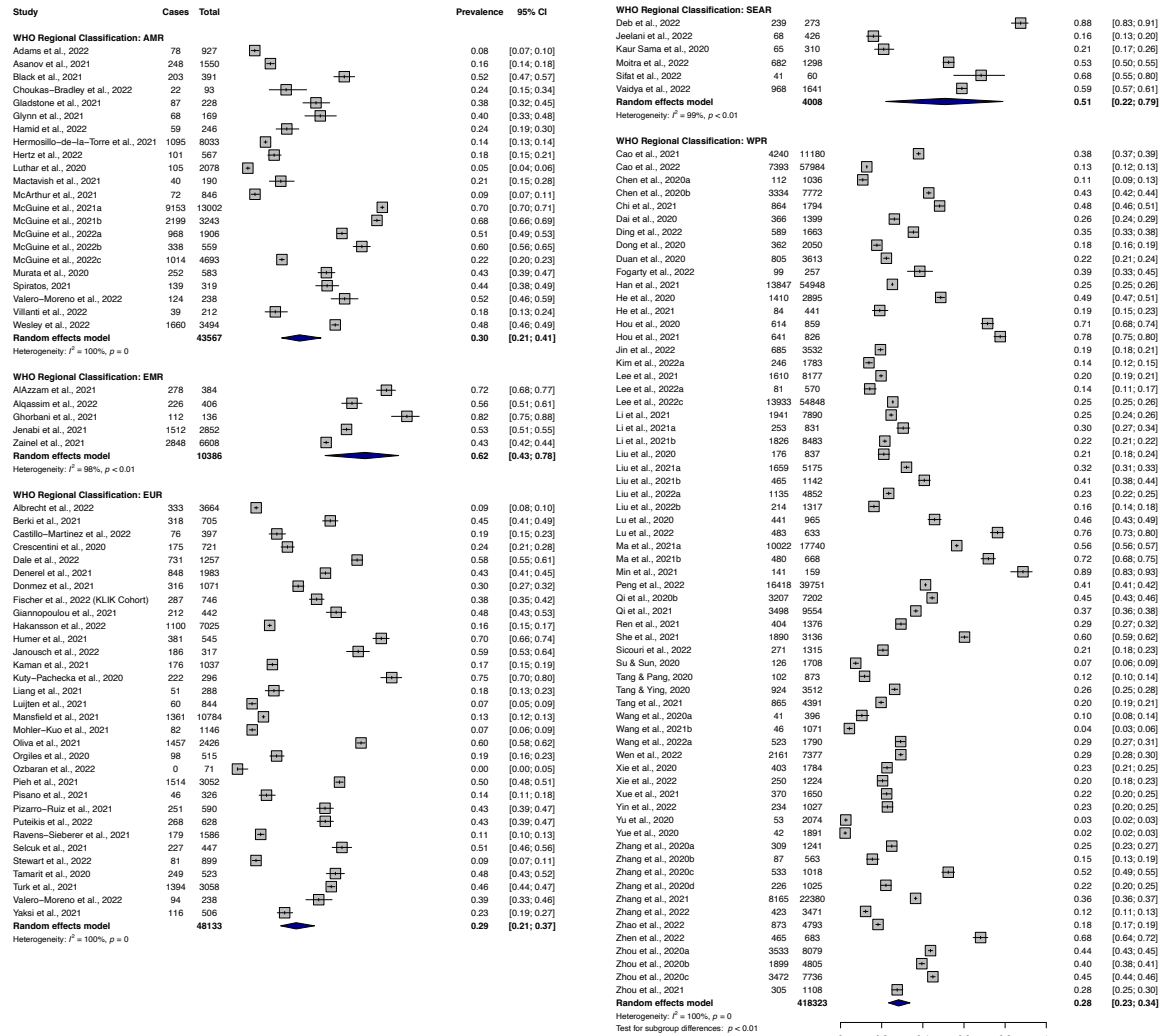

**Figure S11:** Forest plot for the subgroup analysis of anxiety symptoms by geographical regions

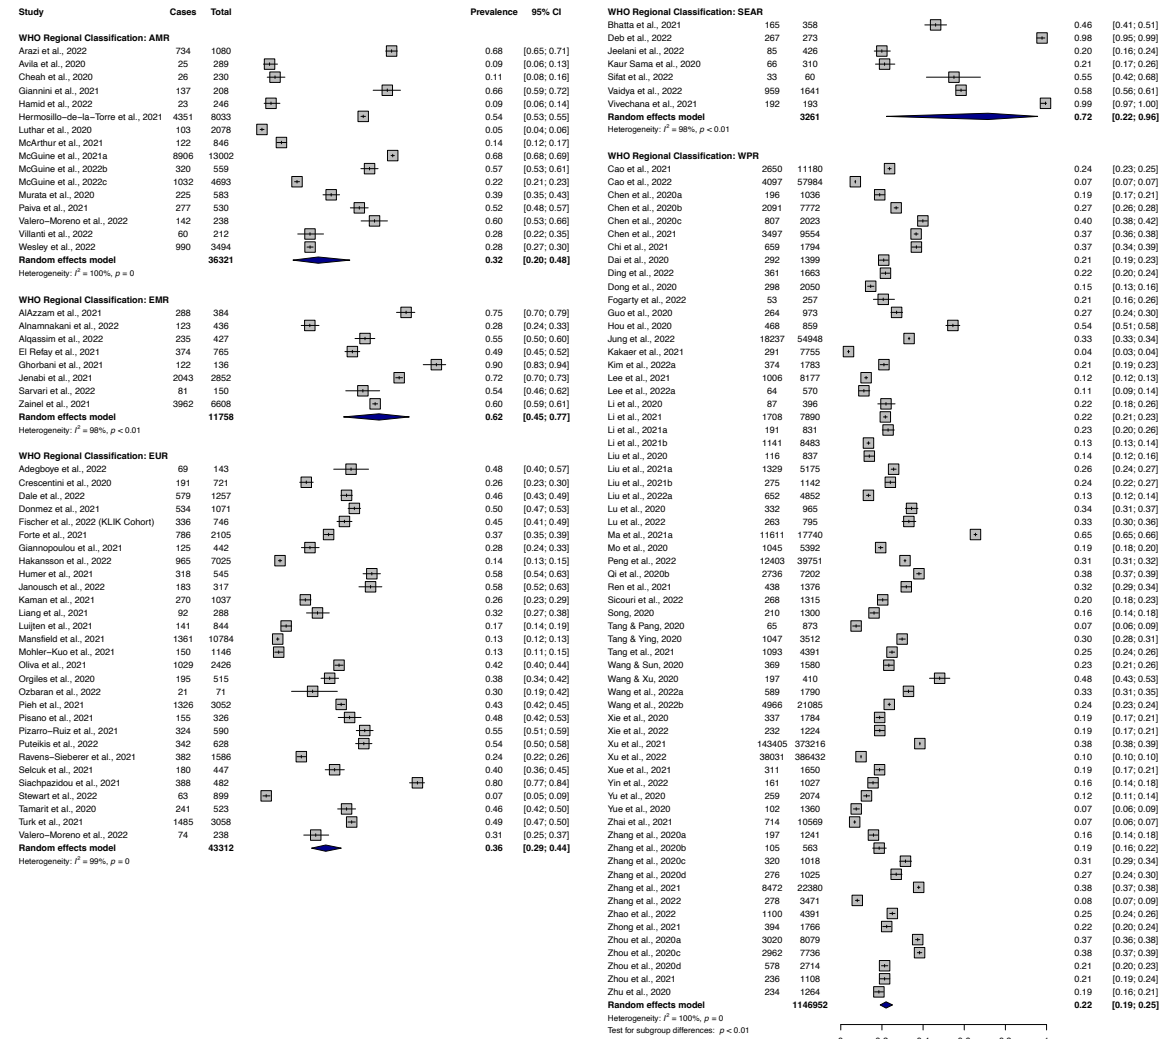

**Abbreviations:** AMR Region of the Americas; EMR Eastern Mediterranean Region; EUR European Region; SEAR South-East Asia Region; WPR Western Pacific Region

**Figure S12:** Forest plot for the subgroup analysis of sleep disturbances by geographical regions

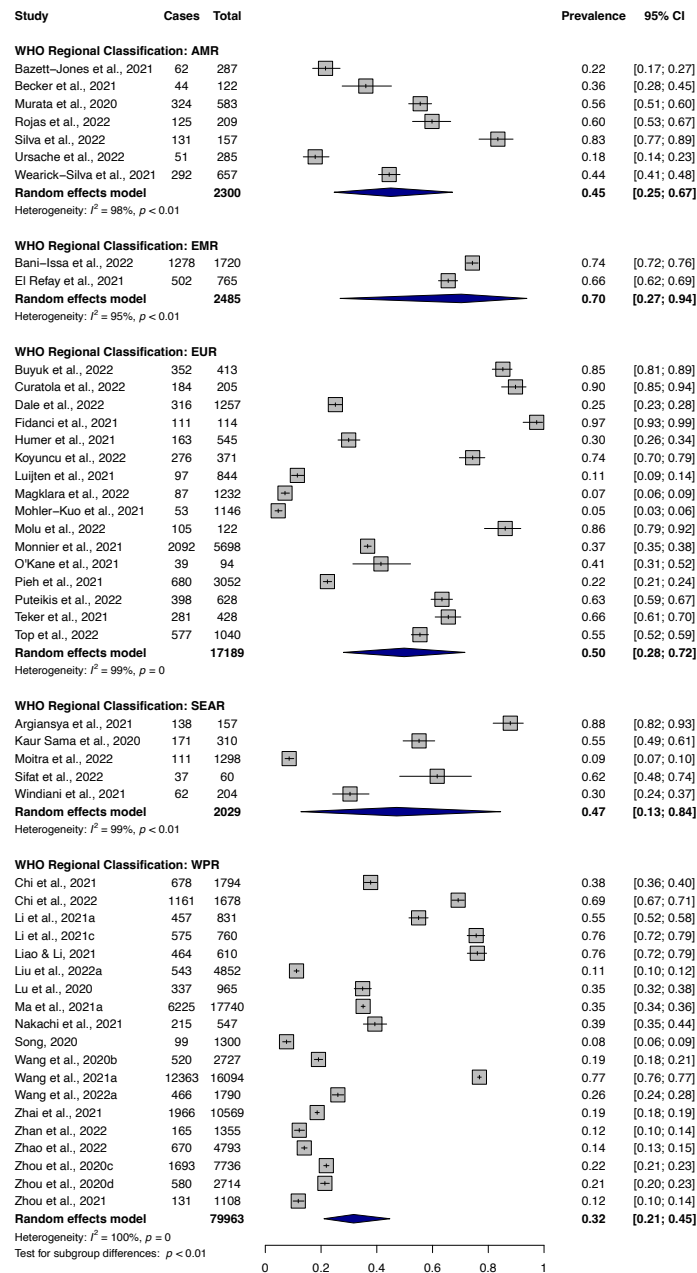

**Abbreviations:** AMR Region of the Americas; EMR Eastern Mediterranean Region; EUR European Region; SEAR South-East Asia Region; WPR Western Pacific Region

**Figure S13:** Forest plot for the subgroup analysis of depressive symptoms by education level

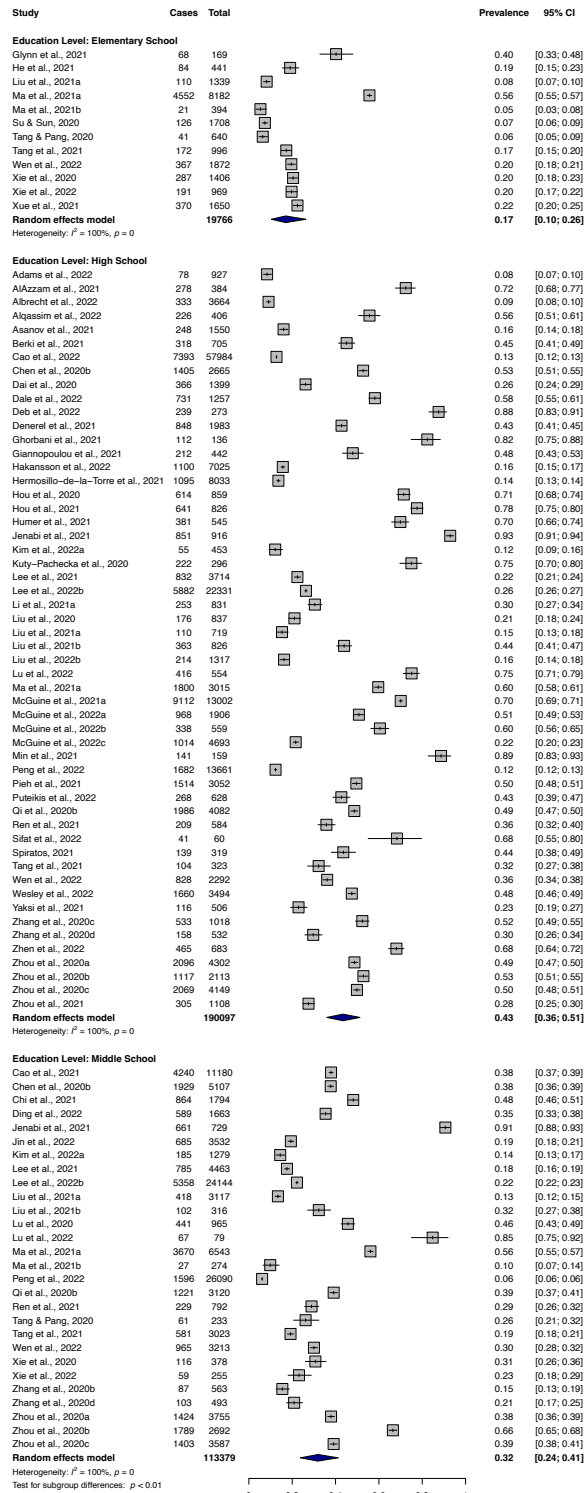

**Figure S14:** Forest plot for the subgroup analysis of anxiety symptoms by education level

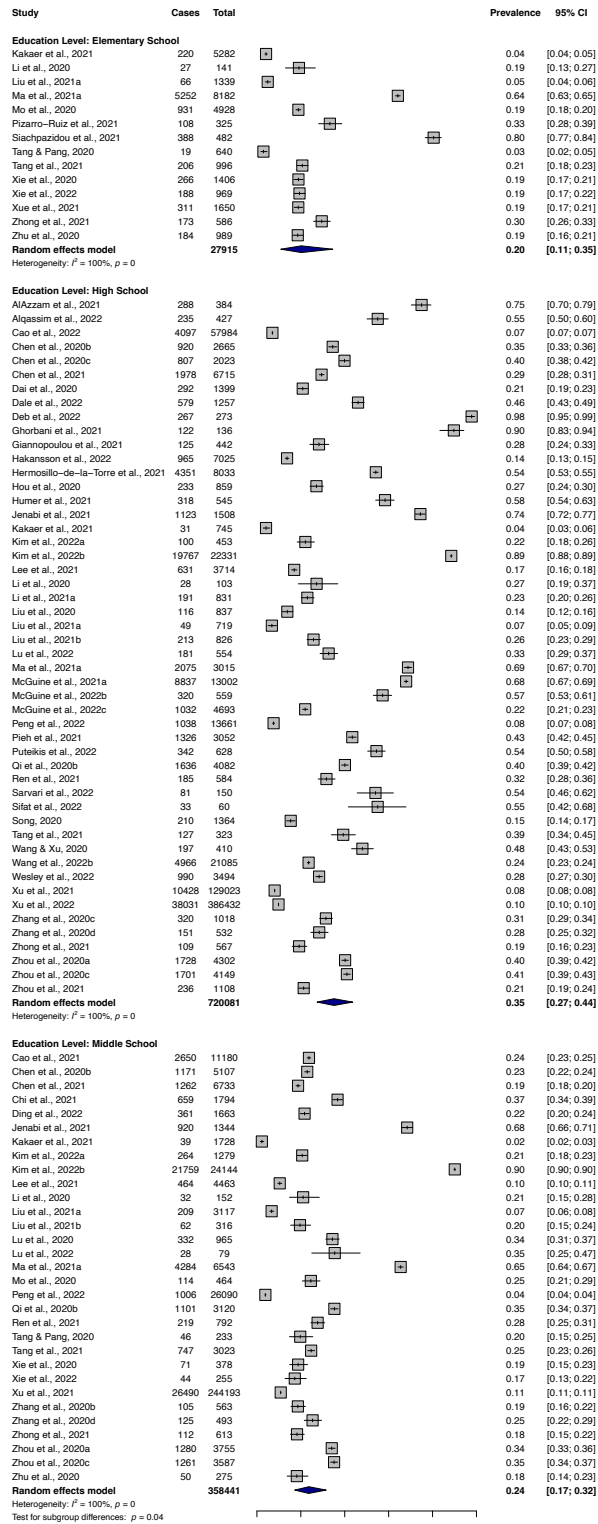

**Figure S15:** Forest plot for the subgroup analysis of depressive symptoms by gender

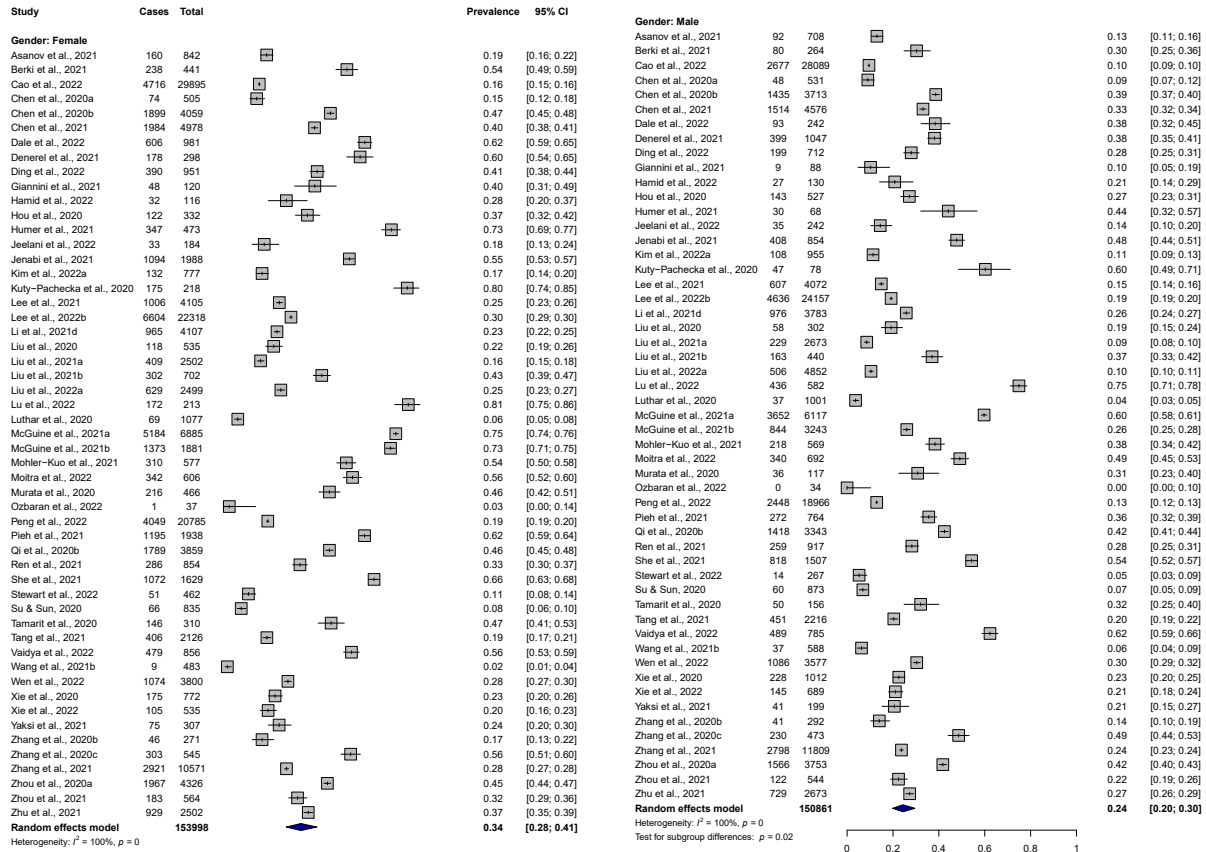



**Figure S16:** Forest plot for the subgroup analysis of anxiety symptoms by gender

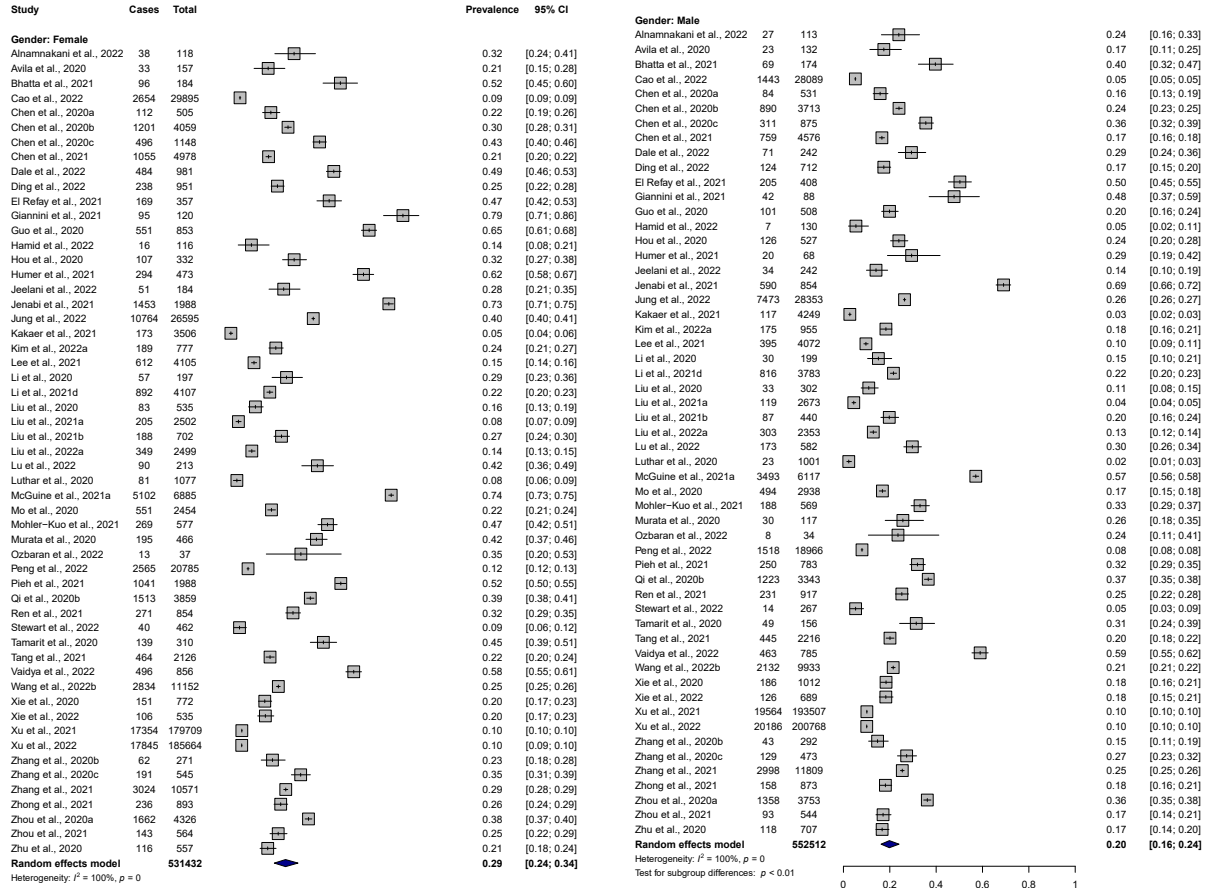

**Figure S17:** Forest plot for the subgroup analysis of depressive symptoms by electronics usage

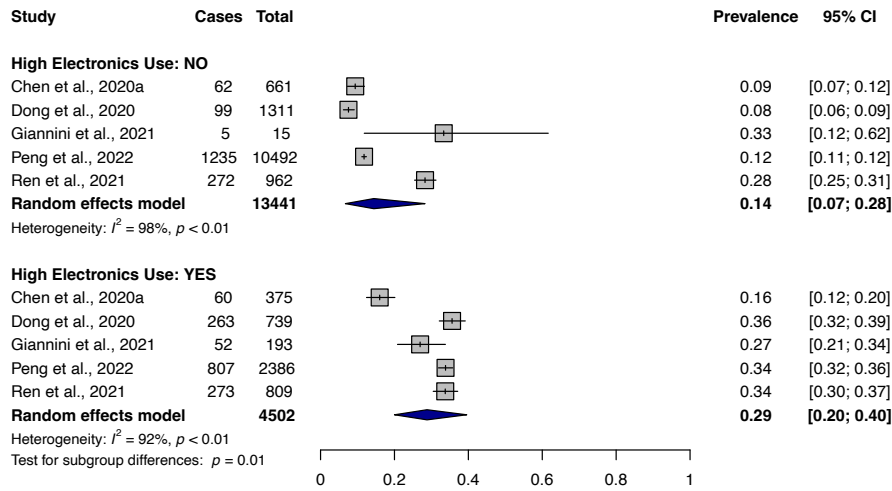

**Figure S18:** Forest plot for the subgroup analysis of anxiety symptoms by electronics usage

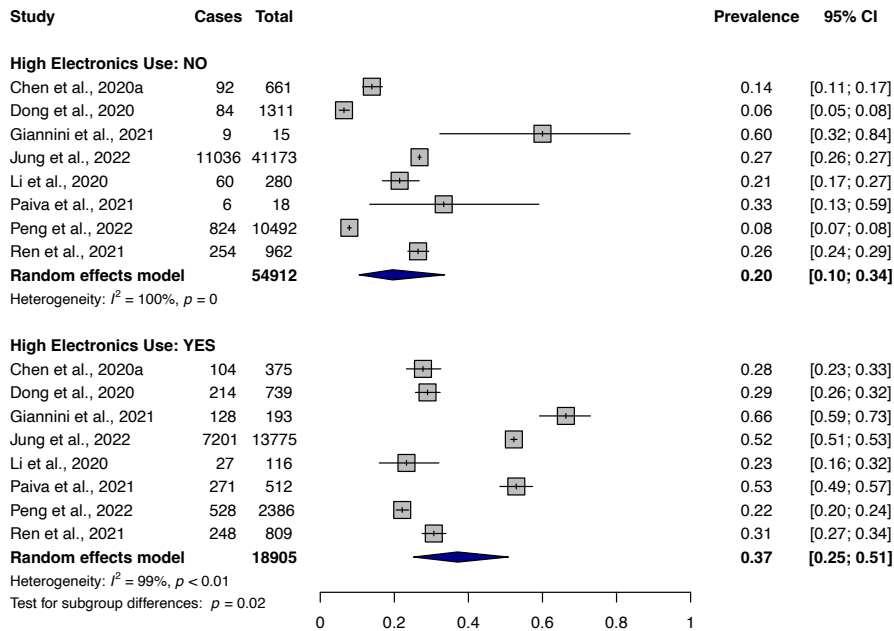

Supplement: NYAS-9999-0-s006.pdf [file NYAS-9999-0-s006.pdf]
