# Supplementary material
Source: PubMed Central journal article supplement (PMC9880764)
Supplement: NYAS-9999-0-s002.pdf [file NYAS-9999-0-s002.pdf]

# **Prevalence of mental health symptoms in children and adolescents during the COVID-19 pandemic: A meta-analysis**

**Supplementary Tables S2-S8:** Database search strategies

**Table S2: MEDLINE search strategy**

| Database: Ovid MEDLINE(R) and Epub Ahead of Print, In-Process, In-Data-Review & Other Non-Indexed Citations, Daily and Versions 1946 to 2022 |                                                                                                                                                                                                                                                                                                                                                                                                                                                                                                                                                                                                                                                                                                                                                                                                                                                                                                                                                               |           |
|----------------------------------------------------------------------------------------------------------------------------------------------|---------------------------------------------------------------------------------------------------------------------------------------------------------------------------------------------------------------------------------------------------------------------------------------------------------------------------------------------------------------------------------------------------------------------------------------------------------------------------------------------------------------------------------------------------------------------------------------------------------------------------------------------------------------------------------------------------------------------------------------------------------------------------------------------------------------------------------------------------------------------------------------------------------------------------------------------------------------|-----------|
| Line Number                                                                                                                                  | Search Statement                                                                                                                                                                                                                                                                                                                                                                                                                                                                                                                                                                                                                                                                                                                                                                                                                                                                                                                                              | Results   |
| 1                                                                                                                                            | ((("Corona virinae" or "corona virus" or Coronavirinae or coronavirus or COVID or nCoV or hCoV) adj4 ("19" or "2019" or novel or new)) or (("Coronavirinae" or "corona virus" or Coronavirinae or coronavirus or COVID or nCoV or hCoV) and (wuhan or china or chinese or hubei)) or "COVID-19" or "Corona virinae19" or "Corona virinae2019" or "corona virus19" or "corona virus2019" or Coronavirinae19 or Coronavirinae2019 or coronavirus19 or coronavirus2019 or COVID19 or COVID2019 or nCoV19 or nCoV2019 or "SARS Corona virus 2" or "SARS Coronavirus 2" or "SARS-COV-2" or "Severe Acute Respiratory Syndrome Corona virus 2" or "Severe Acute Respiratory Syndrome Coronavirus 2" or sarscov*).ti,ab,hw,kw,mp. or (Severe Acute Respiratory Syndrome Coronavirus 2 or COVID-19 or COVID-19 drug treatment or COVID-19 serotherapy or COVID-19 diagnostic testing or COVID-19 vaccine or spike glycoprotein, COVID-19 virus).os,ps,rs,ox,px,rx,nm. | 301,092   |
| 2                                                                                                                                            | depress*.ti,ab,kf. or exp Depression/                                                                                                                                                                                                                                                                                                                                                                                                                                                                                                                                                                                                                                                                                                                                                                                                                                                                                                                         | 563,292   |
| 3                                                                                                                                            | anxiety.ti,ab,kf. or exp Anxiety/ or exp Anxiety Disorders/                                                                                                                                                                                                                                                                                                                                                                                                                                                                                                                                                                                                                                                                                                                                                                                                                                                                                                   | 316,159   |
| 4                                                                                                                                            | sleep.ti,ab,kf. or exp Sleep/ or exp "Sleep Initiation and Maintenance Disorders"/ or insomnia.ti,ab,kf.                                                                                                                                                                                                                                                                                                                                                                                                                                                                                                                                                                                                                                                                                                                                                                                                                                                      | 234,604   |
| 5                                                                                                                                            | exp Mental Disorders/ or exp Mental Health/ or exp Mood Disorders/ or affective disorder?.ti,ab,kf. or mood disorder?.ti,ab,kf. or mental health.ti,ab,kf.                                                                                                                                                                                                                                                                                                                                                                                                                                                                                                                                                                                                                                                                                                                                                                                                    | 1,541,818 |
| 6                                                                                                                                            | (child* or stepchild* or step-child* or kid or kids or girl or girls or boy or boys or teen* or youth* or youngster* or adolescent* or adolescence or preschool* or pre-school* or kindergarten* or school* or juvenile* or minors or p?ediatric* or PICU).ti,ab. or exp child/                                                                                                                                                                                                                                                                                                                                                                                                                                                                                                                                                                                                                                                                               | 3,147,978 |
| 7                                                                                                                                            | (teen* or youth* or adolescen* or juvenile* or (young adj2 (adult* or person* or individual* or people* or population* or man or men or wom#n)) or youngster* or first-grader* or second-grader* or third-grader* or fourth-grader* or fifth-grader* or sixth-grader* or seventh-grader* or high school* or college* or ((secondary or high*) adj2 (school* or education))).ti,ab. or adolescent/ or young adult/                                                                                                                                                                                                                                                                                                                                                                                                                                                                                                                                             | 3,057,546 |
| 8                                                                                                                                            | 1 and (2 or 3 or 4 or 5) and (6 or 7)                                                                                                                                                                                                                                                                                                                                                                                                                                                                                                                                                                                                                                                                                                                                                                                                                                                                                                                         | 8,540     |
| 9                                                                                                                                            | limit 8 to yr="2020-Current"                                                                                                                                                                                                                                                                                                                                                                                                                                                                                                                                                                                                                                                                                                                                                                                                                                                                                                                                  | 8,540     |

**Table S3: EMBASE search strategy**

| Database: Ovid EMBASE 1974 to 2022 |                                                                                                                                                                                                                                                                                                                                                                                                                                                                                                                                                                                                                                                                                                                            |           |
|------------------------------------|----------------------------------------------------------------------------------------------------------------------------------------------------------------------------------------------------------------------------------------------------------------------------------------------------------------------------------------------------------------------------------------------------------------------------------------------------------------------------------------------------------------------------------------------------------------------------------------------------------------------------------------------------------------------------------------------------------------------------|-----------|
| Line Number                        | Search Statement                                                                                                                                                                                                                                                                                                                                                                                                                                                                                                                                                                                                                                                                                                           | Results   |
| 1                                  | ((("Corona virinae" or "corona virus" or Coronavirinae or coronavirus or COVID or nCoV or hCoV) adj4 ("19" or "2019" or novel or new)) or (("Coronavirinae" or "corona virus" or Coronavirinae or coronavirus or COVID or nCoV or hCoV) and (wuhan or china or chinese or hubei)) or "COVID-19" or "Corona virinae19" or "Corona virinae2019" or "corona virus19" or "corona virus2019" or Coronavirinae19 or Coronavirinae2019 or coronavirus19 or coronavirus2019 or COVID19 or COVID2019 or nCoV19 or nCoV2019 or "SARS Corona virus 2" or "SARS Coronavirus 2" or "SARS-COV-2" or "Severe Acute Respiratory Syndrome Corona virus 2" or "Severe Acute Respiratory Syndrome Coronavirus 2" or sarscov*).ti,ab,hw,kw,mp. | 342,593   |
| 2                                  | depress*.ti,ab,kf. or exp Depression/ or exp long term depression/ or exp major depression/ or exp minor depression/                                                                                                                                                                                                                                                                                                                                                                                                                                                                                                                                                                                                       | 903,129   |
| 3                                  | anxiety.ti,ab,kf. or exp Anxiety/ or exp Anxiety Disorders/ or exp generalized anxiety disorder/                                                                                                                                                                                                                                                                                                                                                                                                                                                                                                                                                                                                                           | 584,532   |
| 4                                  | sleep.ti,ab,kf. or exp Sleep/ or exp sleep disorder/ or insomnia.ti,ab,kf. or exp insomnia/                                                                                                                                                                                                                                                                                                                                                                                                                                                                                                                                                                                                                                | 479,549   |
| 5                                  | exp Mental Disorders/ or exp Mental Health/ or exp Mood Disorders/ or affective disorder?.ti,ab,kf. or mood disorder?.ti,ab,kf. or mental health.ti,ab,kf.                                                                                                                                                                                                                                                                                                                                                                                                                                                                                                                                                                 | 2,631,117 |
| 6                                  | (child* or stepchild* or step-child* or kid or kids or girl or girls or boy or boys or teen* or youth* or youngster* or adolescent* or adolescence or preschool* or pre-school* or kindergarten* or school* or juvenile* or minors or p?ediatric* or PICU).ti,ab. or exp child/                                                                                                                                                                                                                                                                                                                                                                                                                                            | 4,093,294 |
| 7                                  | (teen* or youth* or adolescen* or juvenile* or (young adj2 (adult* or person* or individual* or people* or population* or man or men or wom#n)) or youngster* or first-grader* or second-grader* or third-grader* or fourth-grader* or fifth-grader* or sixth-grader* or seventh-grader* or high school* or college* or ((secondary or high*) adj2 (school* or education))).ti,ab. or exp adolescent/ or exp adolescence/ or young adult/                                                                                                                                                                                                                                                                                  | 2,682,447 |
| 8                                  | exp child psychiatry/ or exp child behavior/ or exp child development/ or exp child health/ or exp child welfare/ or exp preschool child/ or exp child healthcare/ or exp school child/ or exp child care/                                                                                                                                                                                                                                                                                                                                                                                                                                                                                                                 | 1,112,619 |
| 9                                  | exp adolescent behavior/ or exp adolescent development/ or exp adolescent depression/ or exp adolescent health/                                                                                                                                                                                                                                                                                                                                                                                                                                                                                                                                                                                                            | 29,976    |
| 10                                 | 1 and (2 or 3 or 4 or 5) and (6 or 7 or 8 or 9)                                                                                                                                                                                                                                                                                                                                                                                                                                                                                                                                                                                                                                                                            | 12,589    |
| 11                                 | limit 10 to yr="2020-Current"                                                                                                                                                                                                                                                                                                                                                                                                                                                                                                                                                                                                                                                                                              | 12,584    |

**Table S4: APA PsycInfo search strategy**

| Database: Ovid APA PsycInfo 1806 to 2022 |                                                                                                                                                                                                                                                                                                                                                                                                                                                                                                                                                                                                                                                                                                                                 |           |
|------------------------------------------|---------------------------------------------------------------------------------------------------------------------------------------------------------------------------------------------------------------------------------------------------------------------------------------------------------------------------------------------------------------------------------------------------------------------------------------------------------------------------------------------------------------------------------------------------------------------------------------------------------------------------------------------------------------------------------------------------------------------------------|-----------|
| Line Number                              | Search Statement                                                                                                                                                                                                                                                                                                                                                                                                                                                                                                                                                                                                                                                                                                                | Results   |
| 1                                        | ((("Corona virinae" or "corona virus" or Coronavirinae or coronavirus or COVID or nCoV or hCoV) adj4 ("19" or "2019" or novel or new)) or (("Coronavirinae" or "corona virus" or Coronavirinae or coronavirus or COVID or nCoV or hCoV) and (wuhan or china or chinese or hubei)) or "COVID-19" or "Corona virinae19" or "Corona virinae2019" or "corona virus19" or "corona virus2019" or Coronavirinae19 or Coronavirinae2019 or coronavirus19 or coronavirus2019 or COVID19 or COVID2019 or nCoV19 or nCoV2019 or "SARS Corona virus 2" or "SARS Coronavirus 2" or "SARS-COV-2" or "Severe Acute Respiratory Syndrome Corona virus 2" or "Severe Acute Respiratory Syndrome Coronavirus 2" or sarscov*).mp. or exp COVID-19/ | 22,855    |
| 2                                        | depress*.mp. or exp "Depression (Emotion)"/ or exp "Long-term Depression (Neuronal)"/ or exp Major Depression/                                                                                                                                                                                                                                                                                                                                                                                                                                                                                                                                                                                                                  | 416,242   |
| 3                                        | anxiety.mp. or exp Anxiety/ or exp Anxiety Disorders/ or exp Generalized Anxiety Disorder/ or exp Health Anxiety/                                                                                                                                                                                                                                                                                                                                                                                                                                                                                                                                                                                                               | 292,819   |
| 4                                        | sleep.mp. or exp Sleep/ or exp Sleep Wake Disorders/ or insomnia.mp. or exp Insomnia/                                                                                                                                                                                                                                                                                                                                                                                                                                                                                                                                                                                                                                           | 102,496   |
| 5                                        | exp Mental Disorders/ or exp Mental Health/ or exp Mood Disorders/ or affective disorder?.mp. or mood disorder?.mp. or mental health.mp.                                                                                                                                                                                                                                                                                                                                                                                                                                                                                                                                                                                        | 1,129,967 |
| 6                                        | (child* or stepchild* or step-child* or kid or kids or girl or girls or boy or boys or teen* or youth* or youngster* or adolescent* or adolescence or preschool* or pre-school* or kindergarten* or school* or juvenile* or minors or p?ediatric* or PICU).ti,ab.                                                                                                                                                                                                                                                                                                                                                                                                                                                               | 1,225,072 |
| 7                                        | (teen* or youth* or adolescen* or juvenile* or (young adj2 (adult* or person* or individual* or people* or population* or man or men or wom#n)) or youngster* or first-grader* or second-grader* or third-grader* or fourth-grader* or fifth-grader* or sixth-grader* or seventh-grader* or high school* or college* or ((secondary or high*) adj2 (school* or education))).ti,ab.                                                                                                                                                                                                                                                                                                                                              | 658,795   |
| 8                                        | exp Child Psychopathology/ or exp Child Care/ or exp Child Welfare/ or exp Child Psychology/ or exp Child Psychotherapy/ or exp Child Attitudes/ or exp Child Health/ or exp Child Self Care/ or exp Child Psychiatry/ or exp Child Behavior/                                                                                                                                                                                                                                                                                                                                                                                                                                                                                   | 55,076    |
| 9                                        | exp Adolescent Psychotherapy/ or exp Adolescent Development/ or exp Adolescent Psychology/ or exp Adolescent Psychiatry/ or exp Adolescent Behavior/ or exp Adolescent Attitudes/ or exp Adolescent Psychopathology/ or exp Adolescent Health/                                                                                                                                                                                                                                                                                                                                                                                                                                                                                  | 100,044   |
| 10                                       | 1 and (2 or 3 or 4 or 5) and (6 or 7 or 8 or 9)                                                                                                                                                                                                                                                                                                                                                                                                                                                                                                                                                                                                                                                                                 | 2,739     |
| 11                                       | limit 10 to yr="2020-Current"                                                                                                                                                                                                                                                                                                                                                                                                                                                                                                                                                                                                                                                                                                   | 2,739     |

**Table S5: PubMed search strategy**

| Database: PubMed Clinical Queries (COVID-19 General Filter) with date restriction (2020-2022) |                                                                                                                                                                                                                                                                                                                                                                                                                                                                                                                                                                                                                                                                                                                                                                                                                                                                                                                                                                                                                                                                                                              |         |
|-----------------------------------------------------------------------------------------------|--------------------------------------------------------------------------------------------------------------------------------------------------------------------------------------------------------------------------------------------------------------------------------------------------------------------------------------------------------------------------------------------------------------------------------------------------------------------------------------------------------------------------------------------------------------------------------------------------------------------------------------------------------------------------------------------------------------------------------------------------------------------------------------------------------------------------------------------------------------------------------------------------------------------------------------------------------------------------------------------------------------------------------------------------------------------------------------------------------------|---------|
| Line Number                                                                                   | Search Statement                                                                                                                                                                                                                                                                                                                                                                                                                                                                                                                                                                                                                                                                                                                                                                                                                                                                                                                                                                                                                                                                                             | Results |
| 1                                                                                             | ("Depress*" OR "Depression"[MeSH Terms] OR "Anxiety" OR "Anxiety"[MeSH Terms] OR "Anxiety Disorders"[MeSH Terms] OR "sleep" OR "Sleep"[MeSH Terms] OR "Sleep Initiation and Maintenance Disorders"[MeSH Terms] OR "insomnia" OR "Mental Disorders"[MeSH Terms] OR "Mental Health"[MeSH Terms] OR "Mood Disorders"[MeSH Terms] OR "affective disorder*" OR "mood disorder*" OR "mental health") AND ("child" OR "child*" OR "schoolchild*" OR "schoolchild" OR "school child" OR "school child*" OR "kid" OR "kids" OR "toddler*" OR "adolescent" OR "adoles*" OR "teen*" OR "boy*" OR "girl*" OR "minors" OR "minors*" OR "underag*" OR "under ag*" OR "juvenil*" OR "youth*" OR "kindergar*" OR "puberty" OR "puber*" OR "pubescen*" OR "prepubescen*" OR "prepuberty*" OR "pediatrics" OR "pediatric*" OR "paediatric*" OR "peadiatric*" OR "schools" OR "nursery school*" OR "preschool*" OR "pre school*" OR "primary school*" OR "secondary school*" OR "elementary school*" OR "elementary school" OR "high school*" OR "highschool*" OR "school age" OR "schoolage" OR "school age*" OR "schoolage*") | 8,801   |

**Table S6: China National Knowledge Infrastructure (CNKI) search strategy**

| Database: CNKI with synonym expansion and date restriction (2020-2022) |                                                                                                                                                                                                                                                                                                                                                                                                                                                                                                                                                                                                                                                                                                                               |         |
|------------------------------------------------------------------------|-------------------------------------------------------------------------------------------------------------------------------------------------------------------------------------------------------------------------------------------------------------------------------------------------------------------------------------------------------------------------------------------------------------------------------------------------------------------------------------------------------------------------------------------------------------------------------------------------------------------------------------------------------------------------------------------------------------------------------|---------|
| Line Number                                                            | Search Statement                                                                                                                                                                                                                                                                                                                                                                                                                                                                                                                                                                                                                                                                                                              | Results |
| 1                                                                      | ((SU='疫情'+ '病毒'+ 'COVID-19' + '2019-nCoV' + 'coronavirus' + '2019nCoV' + 'SARS-CoV-2' + '新冠' + '冠状病毒') OR (TI='疫情'+ '病毒'+ 'COVID-19' + '2019-nCoV' + 'coronavirus' + '2019nCoV' + 'SARS-CoV-2' + '新冠' + '冠状病毒') OR (KY='疫情'+ '病毒'+ 'COVID-19' + '2019-nCoV' + 'coronavirus' + '2019nCoV' + 'SARS-CoV-2' + '新冠' + '冠状病毒')) AND ((SU='儿童' + '少年' + '小儿' + '青年' + '孩童' + '小孩' + '少女' + '童子' + '孩子' + '子女' + '学生' + '未成年' + '幼儿') OR (TI='儿童' + '少年' + '小儿' + '青年' + '孩童' + '小孩' + '少女' + '童子' + '孩子' + '子女' + '学生' + '未成年' + '幼儿')) AND ((SU='睡眠' + '心理' + '情绪' + '焦虑' + '抑郁' + '忧郁' + '沮丧' + '精神') OR (TI='睡眠' + '心理' + '情绪' + '焦虑' + '抑郁' + '忧郁' + '沮丧' + '精神') OR (KY='睡眠' + '心理' + '情绪' + '焦虑' + '抑郁' + '忧郁' + '沮丧' + '精神')) | 793     |

**Table S7:** Web of Science Core Collection search strategy

| Database: Web of Science Core Collection (Advanced Search Query Builder), all editions |                                                                                                                                                                                                                                                                                                                                                                                                                                        |           |
|----------------------------------------------------------------------------------------|----------------------------------------------------------------------------------------------------------------------------------------------------------------------------------------------------------------------------------------------------------------------------------------------------------------------------------------------------------------------------------------------------------------------------------------|-----------|
| Line Number                                                                            | Search Statement                                                                                                                                                                                                                                                                                                                                                                                                                       | Results   |
| #1                                                                                     | TS=("Wuhan coronavirus" OR "COVID19*" OR "COVID-19*" OR "COVID-2019*" OR "coronavirus disease 2019" OR "SARS-CoV-2" OR "2019-nCoV" OR "2019 novel coronavirus" OR "SARSCoV2" OR "SARSCoV-2" OR "coronavirus" OR "coronavirus*" OR "COVID" OR "nCov 2019")                                                                                                                                                                              | 376,745   |
| #2                                                                                     | TI=("Wuhan coronavirus" OR "COVID19*" OR "COVID-19*" OR "COVID-2019*" OR "coronavirus disease 2019" OR "SARS-CoV-2" OR "2019-nCoV" OR "2019 novel coronavirus" OR "SARSCoV2" OR "SARSCoV-2" OR "coronavirus" OR "coronavirus*" OR "COVID" OR "nCov 2019")                                                                                                                                                                              | 305,241   |
| #3                                                                                     | TS=("depress*" OR "anxiety" OR "post\$traumatic" OR "ptsd" OR "sleep" OR "insomnia" OR "affective disorder*" OR "mood disorder*" OR "mental disorder*" OR "mental health")                                                                                                                                                                                                                                                             | 1,419,527 |
| #4                                                                                     | TI=("depress*" OR "anxiety" OR "post\$traumatic" OR "ptsd" OR "sleep" OR "insomnia" OR "affective disorder*" OR "mood disorder*" OR "mental disorder*" OR "mental health")                                                                                                                                                                                                                                                             | 586,016   |
| #5                                                                                     | TS=("child*" OR "stepchild*" OR "step-child*" OR "kid" OR "kids" OR "girl" OR "girls" OR "boy" OR "boys" OR "teen*" OR "youth*" OR "youngster*" OR "adolescent*" OR "adolescence" OR "preschool*" OR "pre-school*" OR "kindergarten*" OR "school*" OR "juvenile*" OR "minors" OR "p?ediatric")                                                                                                                                         | 3,192,181 |
| #6                                                                                     | TI=("child*" OR "stepchild*" OR "step-child*" OR "kid" OR "kids" OR "girl" OR "girls" OR "boy" OR "boys" OR "teen*" OR "youth*" OR "youngster*" OR "adolescent*" OR "adolescence" OR "preschool*" OR "pre-school*" OR "kindergarten*" OR "school*" OR "juvenile*" OR "minors" OR "p?ediatric")                                                                                                                                         | 1,678,097 |
| #7                                                                                     | TS=("teen*" OR "youth*" OR "adolescen*" OR "juvenile*" OR ("young" NEAR/2 ("adult*" OR "person*" OR "individual*" OR "people*" OR "population*" OR "man" OR "men" OR "wom?n")) OR "youngster*" OR "first-grader*" OR "second-grader*" OR "third-grader*" OR "fourthgrader*" OR "fifth-grader*" OR "sixth-grader*" OR "seventh-grader*" OR "high school*" OR "college*" OR (("secondary" OR "high") NEAR/2 ("school*" OR "education"))) | 1,615,536 |
| #8                                                                                     | TI=("teen*" OR "youth*" OR "adolescen*" OR "juvenile*" OR ("young" NEAR/2 ("adult*" OR "person*" OR "individual*" OR "people*" OR "population*" OR "man" OR "men" OR "wom?n")) OR "youngster*" OR "first-grader*" OR "second-grader*" OR "third-grader*" OR "fourthgrader*" OR "fifth-grader*" OR "sixth-grader*" OR "seventh-grader*" OR "high school*" OR "college*" OR (("secondary" OR "high") NEAR/2 ("school*" OR "education"))) | 692,031   |
| #9                                                                                     | (#1 OR #2) AND (#3 OR #4) AND (#5 OR #6 OR #7 OR #8)                                                                                                                                                                                                                                                                                                                                                                                   | 8,506     |
| #10                                                                                    | Date limitation to 2020-2022                                                                                                                                                                                                                                                                                                                                                                                                           | 8,499     |

**Table S8: CINAHL search strategy**

| Database: EBSCOhost CINAHL, Advanced Search |                                                                                                                                                                                                                                                                                                                                                                                                                                                                                                                                                                                                                                                                                                                                                         |           |
|---------------------------------------------|---------------------------------------------------------------------------------------------------------------------------------------------------------------------------------------------------------------------------------------------------------------------------------------------------------------------------------------------------------------------------------------------------------------------------------------------------------------------------------------------------------------------------------------------------------------------------------------------------------------------------------------------------------------------------------------------------------------------------------------------------------|-----------|
| Line Number                                 | Search Statement                                                                                                                                                                                                                                                                                                                                                                                                                                                                                                                                                                                                                                                                                                                                        | Results   |
| S1                                          | TI (2019-nCoV OR 2019nCoV OR COVID-19 OR SARS-CoV-2 OR coronavirus*)                                                                                                                                                                                                                                                                                                                                                                                                                                                                                                                                                                                                                                                                                    | 84,282    |
| S2                                          | (MH "COVID-19") OR (MH "COVID-19 Pandemic") OR (MH "SARS-CoV-2")                                                                                                                                                                                                                                                                                                                                                                                                                                                                                                                                                                                                                                                                                        | 64,916    |
| S3                                          | S1 or S2                                                                                                                                                                                                                                                                                                                                                                                                                                                                                                                                                                                                                                                                                                                                                | 105,918   |
| S4                                          | TI (depression or sleep or anxiety or insomnia or anxiety disorders or mental disorders or mental health or sleep disturbances or mood disorders or affective disorders)                                                                                                                                                                                                                                                                                                                                                                                                                                                                                                                                                                                | 178,109   |
| S5                                          | (MH "Depression+") OR (MH "Affective Disorders, Psychotic+")                                                                                                                                                                                                                                                                                                                                                                                                                                                                                                                                                                                                                                                                                            | 141,639   |
| S6                                          | (MH "Anxiety+") OR (MH "Anxiety Disorders+") OR (MH "Generalized Anxiety Disorder")                                                                                                                                                                                                                                                                                                                                                                                                                                                                                                                                                                                                                                                                     | 101,967   |
| S7                                          | (MH "Sleep+") OR (MH "Sleep Disorders, Circadian Rhythm+") OR (MH "Sleep-Wake Transition Disorders+") OR (MH "Sleep Disorders, Intrinsic+") OR (MH "Sleep Disorders+")                                                                                                                                                                                                                                                                                                                                                                                                                                                                                                                                                                                  | 65,324    |
| S8                                          | (MH "Insomnia+")                                                                                                                                                                                                                                                                                                                                                                                                                                                                                                                                                                                                                                                                                                                                        | 8,820     |
| S9                                          | (MH "Mental Health")                                                                                                                                                                                                                                                                                                                                                                                                                                                                                                                                                                                                                                                                                                                                    | 51,943    |
| S10                                         | S4 or S5 or S6 or S7 or S8 or S9                                                                                                                                                                                                                                                                                                                                                                                                                                                                                                                                                                                                                                                                                                                        | 362,387   |
| S11                                         | TI (child* OR stepchild* OR step-child* OR kid OR kids OR girl OR girls OR boy OR boys OR teen* OR youth* OR youngster* OR adolescent* OR adolescence OR preschool* OR pre-school* OR kindergarten* OR school* OR juvenile* OR minors OR p?ediatric* OR PICU) OR AB (child* OR stepchild* OR step-child* OR kid OR kids OR girl OR girls OR boy OR boys OR teen* OR youth* OR youngster* OR adolescent* OR adolescence OR preschool* OR pre-school* OR kindergarten* OR school* OR juvenile* OR minors OR p?ediatric*)                                                                                                                                                                                                                                  | 872,875   |
| S12                                         | TI (teen* OR youth* OR adolescen* OR juvenile* OR (young N2 (adult* OR person* OR individual* OR people* OR population* OR man OR men OR wom?n)) OR youngster* OR first-grader* OR second-grader* OR third-grader* OR fourth-grader* OR fifth-grader* OR sixth-grader* OR seventh-grader* OR highschool* OR college* OR ((secondary OR high*) N2 (school* OR education))) OR AB (teen* OR youth* OR adolescen* OR juvenile* OR (young N2 (adult* OR person* OR individual* OR people* OR population* OR man OR men OR wom?n)) OR youngster* OR first-grader* OR second-grader* OR third-grader* OR fourth-grader* OR fifth-grader* OR sixth-grader* OR seventh-grader* OR high school* OR college* OR ((secondary OR high*) N2 (school* OR education))) | 394,634   |
| S13                                         | (MH "Child+") OR (MH "Child Behavior Disorders+") OR (MH "Child Behavior+")                                                                                                                                                                                                                                                                                                                                                                                                                                                                                                                                                                                                                                                                             | 755,870   |
| S14                                         | (MH "Adolescent Psychiatry") OR (MH "Adolescent Psychology") OR (MH "Adolescent Health")                                                                                                                                                                                                                                                                                                                                                                                                                                                                                                                                                                                                                                                                | 13,699    |
| S15                                         | (MH "Adolescence+")                                                                                                                                                                                                                                                                                                                                                                                                                                                                                                                                                                                                                                                                                                                                     | 590,115   |
| S16                                         | (MH "Young Adult")                                                                                                                                                                                                                                                                                                                                                                                                                                                                                                                                                                                                                                                                                                                                      | 282,350   |
| S17                                         | S11 or S12 or S13 or S14 or S15 or S16                                                                                                                                                                                                                                                                                                                                                                                                                                                                                                                                                                                                                                                                                                                  | 1,621,706 |
| S18                                         | S3 and S10 and S17                                                                                                                                                                                                                                                                                                                                                                                                                                                                                                                                                                                                                                                                                                                                      | 1,984     |
| S19                                         | Date limitation to 2020-2022                                                                                                                                                                                                                                                                                                                                                                                                                                                                                                                                                                                                                                                                                                                            | 1,794     |
