# Supplementary material
Source: PubMed Central journal article supplement (PMC9880764)
Supplement: NYAS-9999-0-s003.pdf [file NYAS-9999-0-s003.pdf]

# **Prevalence of mental health symptoms in children and adolescents during the COVID-19 pandemic: A meta-analysis**

**Supplementary Tables S11-S13:** Subgroup definitions

**Table S11:** Subgroup definition for high electronics use

| <b>Study</b>           | <b>Definition of high electronics use</b>                                                                                |
|------------------------|--------------------------------------------------------------------------------------------------------------------------|
| Chen et al., 2020a     | Not reported ("Electronic entertainment")                                                                                |
| Dong et al., 2020      | IAT >40                                                                                                                  |
| Li et al., 2020        | Phone entertainment >2 hours/day                                                                                         |
| Argiansya et al., 2021 | Electronic media use >10 hours/day                                                                                       |
| Giannini et al., 2021  | Screen time >2 hours/day                                                                                                 |
| Paiva et al., 2021     | Not reported ("Using cellphone, tablet, computer, television to entertain the child during full time social distancing") |
| Peng et al., 2022      | Screen time >5 hours/day                                                                                                 |
| Ren et al., 2021       | Screen time >60 minutes per day                                                                                          |
| Teker et al., 2021     | Not reported ("Nomofobia")                                                                                               |
| Top et al., 2022       | "Excessive screen use and gaming during COVID-19 pandemic"                                                               |
| Wang et al., 2021a     | Screen exposure >1 hour/day                                                                                              |
| Windiani et al., 2021  | Screen time >5 hours/school day                                                                                          |
| Zhai et al., 2021      | Electronics use >5 hours/day"                                                                                            |

**Abbreviations:** IAT Internet Addiction Test.

**Table S12:** Subgroup definition for high physical activity

| <b>Study</b>           | <b>Definition of high physical activity</b>                                                  |
|------------------------|----------------------------------------------------------------------------------------------|
| Chen et al., 2020a     | Not reported ("Regular physical exercise")                                                   |
| Hou et al., 2020       | Not reported ("High exercise frequency")                                                     |
| Li et al., 2020        | Exercise at home >2 hours/day                                                                |
| McGuine et al., 2021a  | Student athletes                                                                             |
| Zhou et al., 2020b     | Exercise duration >60 minutes/day                                                            |
| Denerel et al., 2021   | Student athletes                                                                             |
| Giannini et al., 2021  | Physical activity $\geq$ 300 minutes/week                                                    |
| Liu et al., 2021b      | Physical exercise >60 minutes/day                                                            |
| Paiva et al., 2021     | Not reported ("Child performs physical activity at home during full time social distancing") |
| Peng et al., 2022      | Physical activity >60 minutes/day                                                            |
| Qi et al., 2021        | Physical exercise >60 minutes/day                                                            |
| Ren et al., 2021       | Physical activity >60 minutes/day                                                            |
| Wen et al., 2022       | Not reported ("Daily exercise")                                                              |
| Yakşı et al., 2021     | Not reported ("Exercising regularly")                                                        |
| Hakansson et al., 2022 | Student athletes                                                                             |
| Adams et al., 2022     | Student athletes                                                                             |
| McGuine et al., 2022c  | Not reported ("Participate in sports")                                                       |
| Jeelani et al., 2022   | Not reported ("Optimal physical activity and more")                                          |

**Table S13:** Subgroup definition for financial difficulty

| <b>Study</b>             | <b>Definition of financial difficulty</b>                |
|--------------------------|----------------------------------------------------------|
| Avila et al., 2020       | Not reported ("Decreased household income")              |
| McGuine et al., 2021a    | Residing in an area with high poverty levels             |
| Giannini et al., 2021    | Not reported ("Financial difficulty")                    |
| Han et al., 2021         | Perceived low or medium-to-low household economic status |
| Teker et al., 2021       | Perceived income is lower than expenses                  |
| Top et al., 2022         | Not reported ("Low family income")                       |
| Wang et al., 2021a       | Familial income $\leq 10,000$ RMB                        |
| Alnamnakani et al., 2022 | Monthly family income <5000 SAR                          |
| Asanov et al., 2021      | Lowest wealth quartile                                   |
