# Supplementary material
Source: PubMed Central journal article supplement (PMC9880764)
Supplement: NYAS-9999-0-s004.pdf [file NYAS-9999-0-s004.pdf]

## **Prevalence of mental health symptoms in children and adolescents during the COVID-19 pandemic: A meta-analysis**

**Supplementary Table S9:** Characteristics of included studies and patients

**Table S9:** Characteristics of included studies and patients

| Study                                        | Country              | Study Design    | Response Rate (%) | Sample Size (n) | Female (%) | Age <sup>a</sup>   | Screening Tools and Cutoff Values |            |                    |
|----------------------------------------------|----------------------|-----------------|-------------------|-----------------|------------|--------------------|-----------------------------------|------------|--------------------|
|                                              |                      |                 |                   |                 |            |                    | Depression                        | Anxiety    | Sleep Disturbances |
| Adams et al., 2022 <sup>1</sup>              | US                   | Longitudinal    | -                 | 927             | 37.1       | 15.5±1.21          | PHQ-2≥3                           | -          | -                  |
| Adegboye et al., 2022 <sup>2</sup>           | United Kingdom       | Longitudinal    | -                 | 143             | 37.8       | -                  | -                                 | SCARED≥25  | -                  |
| AlAzzam et al., 2021 <sup>3</sup>            | Jordan               | Cross-Sectional | -                 | 384             | 59.9       | 17.59±0.5          | PHQ-9≥5                           | GAD-7≥5    | -                  |
| Albrecht et al., 2022 <sup>4</sup>           | Switzerland          | Longitudinal    | 38.0              | 3664            | 66.3       | 16 (15-17)         | YSR/11-18 T-Value≥70              | -          | -                  |
| Alnamnani et al., 2022 <sup>5</sup>          | Saudi Arabia         | Cross-Sectional | 86.0              | 436             | 27.1       | 7.68±1.21          | -                                 | SCAS-P     | -                  |
| Alqassim et al., 2022 <sup>6</sup>           | Saudi Arabia         | Cross-Sectional | 97.1              | 427             | 57.8       | 15-18 <sup>b</sup> | DASS-21D≥10                       | DASS-21A≥8 | -                  |
| Arazi et al., 2022 <sup>7</sup>              | Argentina            | Cross-Sectional | 96.7              | 1080            | 51.9       | 3-15 <sup>b</sup>  | -                                 | CQ         | -                  |
| Argiansya et al., 2021 <sup>8</sup>          | Indonesia            | Cross-Sectional | 65.0              | 157             | 69.4       | 16 <sup>c</sup>    | -                                 | -          | SDSC               |
| Asanov et al., 2021 <sup>9</sup>             | Ecuador              | Cross-Sectional | 64.3              | 1550            | 54.3       | 15.9 <sup>c</sup>  | MHI-5<17                          | -          | -                  |
| Avila et al., 2020 <sup>10</sup>             | Brazil/Portugal      | Cross-Sectional | 99.2              | 253             | 47.8       | 7.5±3.4            | -                                 | CAQ≥9      | -                  |
| Bani-Issa et al., 2022 <sup>11</sup>         | United Arab Emirates | Cross-Sectional | -                 | 1720            | 60.2       | 14.6±1.97          | -                                 | -          | PSQI>5             |
| Baptista et al., 2020 <sup>12</sup>          | China                | Cross-Sectional | 93.4              | 1036            | 48.7       | 6-15 <sup>b</sup>  | -                                 | -          | SDSC               |
| Bazett-Jones et al., 2021 <sup>13</sup>      | US                   | Longitudinal    | 49.8              | 287             | 56.4       | 15.3±1.7           | -                                 | -          | PSQI               |
| Becker et al., 2021 <sup>14</sup>            | US                   | Longitudinal    | -                 | 122             | 38.5       | 16.28±0.35         | -                                 | -          | SDSC≥70            |
| Berki et al., 2021 <sup>15</sup>             | Hungary              | Cross-Sectional | 98.1              | 705             | 62.6       | 14-19 <sup>b</sup> | CDI-S>4                           | -          | -                  |
| Bhatta et al., 2021 <sup>16</sup>            | Nepal                | Cross-Sectional | -                 | 358             | 51.4       | 16.17±1.57         | -                                 | GAD-7≥5    | -                  |
| Black et al., 2021 <sup>17</sup>             | US                   | Cross-Sectional | 30.2              | 391             | 29.9       | 10.68±2.28         | MFQ-C>12                          | -          | -                  |
| Büyük et al., 2022 <sup>18</sup>             | Turkey               | Cross-Sectional | 16.8              | 413             | 51.1       | 15.78±1.23         | -                                 | -          | PSQI>5             |
| Cao et al., 2021 <sup>19</sup>               | China                | Cross-Sectional | 95.7              | 11180           | 49.9       | 14.33±1.10         | PHQ-9≥5                           | GAD-7≥5    | -                  |
| Cao et al., 2022 <sup>20</sup>               | China                | Cross-Sectional | 96.8              | 57984           | 51.6       | 14.8±1.6           | PHQ-9≥10                          | GAD-7≥10   | -                  |
| Castillo-Martínez et al., 2022 <sup>21</sup> | Spain                | Cross-Sectional | 97.1              | 397             | 54.4       | 8-18 <sup>b</sup>  | CDI                               | -          | -                  |
| Cheah et al., 2020 <sup>22</sup>             | US                   | Cross-Sectional | -                 | 230             | 47.8       | 13.83±2.53         | -                                 | GAD-7≥10   | -                  |
| Chen et al., 2020a <sup>23</sup>             | China                | Cross-Sectional | 98.8              | 7772            | 52.2       | -                  | DSRS≥15                           | SCARED≥25  | -                  |
| Chen et al., 2020b <sup>24</sup>             | China                | Cross-Sectional | 98.4              | 2023            | 56.7       | -                  | PHQ-9≥5                           | GAD-7≥5    | -                  |
| Chen et al., 2020c <sup>25</sup>             | Italy                | Cross-Sectional | 84.9              | 721             | 48.4       | 10.1±2.5           | -                                 | Anxiety    | -                  |

|                                            |                         |                 |      |       |      |                    |                       |                       |         |
|--------------------------------------------|-------------------------|-----------------|------|-------|------|--------------------|-----------------------|-----------------------|---------|
| Chen et al., 2021 <sup>26i</sup>           | China                   | Cross-Sectional | 98.1 | 9554  | 52.1 | -                  | CES-D>15              | GAD-7≥5               | -       |
| Chi et al., 2021 <sup>27</sup>             | China                   | Cross-Sectional | -    | 1794  | 43.9 | 15.26±0.46         | PHQ-9≥5               | GAD-7≥5               | YSIS≥22 |
| Chi et al., 2022 <sup>28</sup>             | South Korea             | Cross-Sectional | 18.6 | 1678  | 51.4 | 13.83±0.95         | -                     | -                     | PSQI>5  |
| Choukas-Bradley et al., 2022 <sup>29</sup> | US                      | Longitudinal    | -    | 93    | 100  | 15.01±1.21         | MFQ-C≥20              | -                     | -       |
| Crescentini et al., 2020 <sup>30</sup>     | China                   | Cross-Sectional | -    | 1399  | 59.8 | 16.8±1.1           | CBCL                  | CBCL                  | -       |
| Curatola et al., 2022 <sup>31</sup>        | Italy                   | Cross-Sectional | 95.8 | 205   | 55.6 | 9.9±1.9            | -                     | -                     | CSHQ>41 |
| Dai et al., 2020 <sup>32</sup>             | China                   | Cross-Sectional | 90.3 | 2050  | 48.4 | 12.3±4.7           | DASS-21D≥10           | DASS-21A≥8            | -       |
| Dale et al., 2022 <sup>33</sup>            | Austria                 | Longitudinal    | -    | 1505  | 77.9 | 16.3±1.4           | PHQ-9≥10              | GAD-7≥10              | ISI≥15  |
| Deb et al., 2022 <sup>34</sup>             | India                   | Cross-Sectional | -    | 273   | 45.1 | -                  | RADS-2≥1              | MASC≥1                | -       |
| Denerel et al., 2021 <sup>35</sup>         | Turkey                  | Cross-Sectional | 74.3 | 1983  | 15.0 | -                  | CES-DC>15             | -                     | -       |
| Ding et al., 2022 <sup>36</sup>            | China                   | Cross-Sectional | 95.4 | 1663  | 57.2 | 14.24±1.04         | CES-D≥20              | SAS≥50                | -       |
| Dong et al., 2020 <sup>37</sup>            | China                   | Cross-Sectional | -    | 3613  | 49.8 | -                  | DASS-21D≥10           | DASS-21A≥8            | -       |
| Dönmez et al., 2021 <sup>38</sup>          | Turkey                  | Cross-Sectional | -    | 1071  | 48.0 | 10.54±3.3          | DSM-5-DS-P T-Score≥55 | DSM-5-AS-P T-Score≥55 | -       |
| Duan et al., 2020 <sup>39</sup>            | Brazil                  | Cross-Sectional | -    | 289   | 54.3 | 8.8±2.1            | CDI≥19                | -                     | -       |
| El Refay et al., 2021 <sup>40</sup>        | Egypt                   | Cross-Sectional | -    | 765   | 46.7 | 4-16 <sup>b</sup>  | -                     | CQ                    | SDSC>39 |
| Fidancı et al., 2021 <sup>41</sup>         | Turkey                  | Cross-Sectional | -    | 114   | 56.1 | 11.32±3.02         | -                     | -                     | SDSC≥70 |
| Fischer et al., 2022 <sup>42j</sup>        | Netherlands             | Longitudinal    | -    | 746   | 46.6 | 13.7±3.2           | PROMIS                | PROMIS                | -       |
| Fogarty et al., 2022 <sup>43</sup>         | Australia               | Longitudinal    | 61.3 | 257   | 54.1 | 15.47±0.87         | PHQ-A≥10              | GAD-7≥10              | -       |
| Forte et al., 2021 <sup>44</sup>           | Italy, Romania, Croatia | Cross-Sectional | -    | 2105  | 31.3 | -                  | -                     | CQ                    | -       |
| Ghorbani et al., 2021 <sup>45</sup>        | Iran                    | Cross-Sectional | 88.3 | 136   | 55.9 | 16.28±0.97         | DASS-21D≥10           | DASS-21A≥8            | -       |
| Giannini et al., 2021 <sup>46</sup>        | Brazil                  | Cross-Sectional | -    | 208   | 57.7 | 15.3±1.8           | -                     | CQ                    | -       |
| Giannopoulou et al., 2021 <sup>47</sup>    | Greece                  | Longitudinal    | 96.3 | 442   | 68.8 | -                  | PHQ-9≥11              | GAD-7≥11              | -       |
| Gladstone et al., 2021 <sup>48</sup>       | US                      | Cross-Sectional | -    | 228   | -    | 14.5±1.6           | PHQ-A                 | -                     | -       |
| Glynn et al., 2021 <sup>49</sup>           | US                      | Cross-Sectional | -    | 169   | 46.7 | 4.10±0.93          | PFC≥3                 | -                     | -       |
| Guo et al., 2020 <sup>50</sup>             | China                   | Cross-Sectional | 93.5 | 973   | 47.8 | 13-16 <sup>b</sup> | -                     | SCARED≥23             | -       |
| Håkansson et al., 2022 <sup>51</sup>       | Sweden                  | Cross-Sectional | 83.2 | 7025  | 42.8 | -                  | PHQ-9≥10              | GAD-7≥10              | -       |
| Hamid et al., 2022 <sup>52</sup>           | Canada                  | Cross-Sectional | -    | 246   | 47.2 | -                  | RCADS-D T-Score>65    | RCADS-A T-Score>65    | -       |
| Han et al., 2021 <sup>53k</sup>            | South Korea             | Cross-Sectional | 94.9 | 54948 | 48.4 | -                  | CQ                    | -                     | -       |

|                                                   |             |                 |      |       |      |                    |             |              |         |
|---------------------------------------------------|-------------|-----------------|------|-------|------|--------------------|-------------|--------------|---------|
| He et al., 2020 <sup>54</sup>                     | China       | Cross-Sectional | 96.1 | 2895  | 53.9 | -                  | CQ          | -            | -       |
| He et al., 2021 <sup>55</sup>                     | China       | Cross-Sectional | -    | 441   | 45.1 | 11.83±0.79         | CES-DC>15   | -            | -       |
| Hermosillo-de-la-Torre et al., 2021 <sup>56</sup> | Mexico      | Cross-Sectional | -    | 8033  | 51.0 | 16.00±0.98         | CESD-R      | BAI>5        | -       |
| Hertz et al., 2022 <sup>57</sup>                  | US          | Cross-Sectional | -    | 567   | 51.5 | -                  | PHQ-A       | -            | -       |
| Hou et al., 2020 <sup>58</sup>                    | China       | Cross-Sectional | -    | 859   | 38.6 | -                  | PHQ-9≥10    | GAD-7≥5      | -       |
| Hou et al., 2021 <sup>59</sup>                    | China       | Cross-Sectional | 99.4 | 826   | 42.9 | -                  | PHQ-9≥5     | -            | -       |
| Humer et al., 2021 <sup>60</sup>                  | Austria     | Longitudinal    | -    | 545   | 86.8 | -                  | PHQ-9≥11    | GAD-7≥11     | ISI≥15  |
| Janousch et al., 2022 <sup>61</sup>               | Switzerland | Longitudinal    | -    | 317   | 44.8 | 13.61±0.67         | HSCL-25D    | HSCL-25A     | -       |
| Jeelani et al., 2022 <sup>62</sup>                | India       | Cross-Sectional | 97.0 | 426   | 43.2 | 17.5±1.26          | PHQ-A≥10    | GAD-7≥10     | -       |
| Jenabi et al., 2021 <sup>63</sup>                 | Iran        | Cross-Sectional | 100  | 2852  | 69.7 | 12-18 <sup>b</sup> | DASS-21D≥10 | DASS-21A≥8   | -       |
| Jin et al., 2022 <sup>64</sup>                    | China       | Cross-Sectional | 86.3 | 3532  | 89.3 | 17.03±1.29         | CES-D≥20    | -            | -       |
| Jung et al., 2022 <sup>65k</sup>                  | South Korea | Cross-Sectional | 94.9 | 54948 | 48.4 | -                  | -           | GAD-7≥5      | -       |
| Kakaer et al., 2021 <sup>66</sup>                 | China       | Cross-Sectional | 93.7 | 7755  | 45.2 | 10.73±2.98         | -           | Conners PSQ  | -       |
| Kaman et al., 2021 <sup>67</sup>                  | Germany     | Cross-Sectional | 13.8 | 1037  | 47.9 | 13.77±1.97         | PHQ-2       | SCARED       | -       |
| Kaur Sama et al., 2020 <sup>68</sup>              | India       | Cross-Sectional | 77.5 | 310   | 42.3 | -                  | CQ          | CQ           | CQ      |
| Kim et al., 2022a <sup>69</sup>                   | South Korea | Cross-Sectional | 93.9 | 1783  | 55.1 | 15.4±1.7           | PHQ-9≥10    | GAD-7≥10     | -       |
| Kim et al., 2022b <sup>70k</sup>                  | South Korea | Longitudinal    | -    | 46475 | 48.0 | -                  | -           | GAD-7≥10     | -       |
| Koyuncu et al., 2022 <sup>71</sup>                | Turkey      | Cross-Sectional | -    | 371   | -    | -                  | -           | -            | SDSC≥39 |
| Kuty-Pachecka et al., 2020 <sup>72</sup>          | Poland      | Cross-Sectional | 94.4 | 296   | 73.6 | 18.10±0.64         | KADS>6      | -            | -       |
| Lee et al., 2021 <sup>73</sup>                    | South Korea | Cross-Sectional | 66.5 | 8177  | 50.2 | -                  | PHQ-9≥5     | GAD-7≥5      | -       |
| Lee et al., 2022a <sup>74</sup>                   | South Korea | Cross-Sectional | -    | 570   | 50.9 | -                  | PHQ-9≥10    | GAD-7≥10     | -       |
| Lee et al., 2022b <sup>75k</sup>                  | South Korea | Longitudinal    | -    | 46475 | 48.0 | 15.12±1.77         | CQ          | -            | -       |
| Lee et al., 2022c <sup>76l</sup>                  | South Korea | Longitudinal    | -    | 54848 | 46.0 | 15.23±0.02         | CQ          | -            | -       |
| Li et al., 2020 <sup>77f</sup>                    | China       | Cross-Sectional | 93.6 | 396   | 49.7 | 12.8±2.6           | -           | SCARED≥25    | -       |
| Li et al., 2021a <sup>78</sup>                    | China       | Longitudinal    | 81.5 | 831   | 52.1 | 15.89±0.74         | BDI-II≥14   | SAS≥50       | PSQI>5  |
| Li et al., 2021b <sup>79</sup>                    | China       | Cross-Sectional | -    | 8483  | 60.5 | 15.31±0.02         | PHQ-9≥5     | CQ           | -       |
| Li et al., 2021c <sup>80</sup>                    | Australia   | Cross-Sectional | 43.6 | 760   | 54.2 | 14.80±1.26         | -           | -            | ISI     |
| Li et al., 2021d <sup>81</sup>                    | China       | Cross-Sectional | 73.6 | 7890  | 71.6 | -                  | HADS-D>7    | HADS-A>7     | -       |
| Liang et al., 2021 <sup>82</sup>                  | Italy       | Longitudinal    | -    | 1053  | 49.1 | 14.13±2.25         | SMFQ-P>11   | SCAS-P-8>7.5 | -       |
| Liao & Li, 2021 <sup>83g</sup>                    | China       | Cross-Sectional | -    | 610   | 47.5 | 6.53±2.99          | -           | -            | CSHQ>41 |

|                                        |                |                 |      |       |      |                   |                    |                                             |               |
|----------------------------------------|----------------|-----------------|------|-------|------|-------------------|--------------------|---------------------------------------------|---------------|
| Liao et al., 2022 <sup>84g</sup>       | China          | Cross-Sectional | 94.6 | 610   | 47.5 | 2-12 <sup>b</sup> | -                  | -                                           | CSHQ>41       |
| Liu et al., 2020 <sup>85</sup>         | China          | Cross-Sectional | 98.6 | 837   | 63.9 | -                 | SCL-90≥2           | SCL-90≥2                                    | -             |
| Liu et al., 2021a <sup>86h</sup>       | China          | Cross-Sectional | 56   | 5175  | 48.3 | 13.37±1.44        | PHQ-9≥5            | GAD-7≥5                                     | -             |
| Liu et al., 2021b <sup>87</sup>        | China          | Cross-Sectional | -    | 1142  | 61.5 | 15.8±1.6          | CES-DC>15          | GAD-7≥5                                     | -             |
| Liu et al., 2022a <sup>88</sup>        | China          | Cross-Sectional | -    | 4852  | 51.5 | 13.8±2.38         | SDS≥53             | SAS≥50                                      | AIS>6         |
| Liu et al., 2022b <sup>89</sup>        | China          | Cross-Sectional | 95.0 | 1317  | 53.8 | 15.96±0.81        | BDI-II≥14          | -                                           | -             |
| Lu et al., 2020 <sup>90</sup>          | China          | Cross-Sectional | 91.6 | 965   | 42.4 | 15.3±0.5          | PHQ-9≥5            | GAD-7≥5                                     | YSIS≥22       |
| Lu et al., 2022 <sup>91</sup>          | China          | Cross-Sectional | -    | 795   | 26.8 | 17.0±1.4          | SDS≥50             | SAS≥50                                      | -             |
| Luijten et al., 2021 <sup>92</sup>     | Netherlands    | Cross-Sectional | -    | 844   | 52.6 | 13.4±2.8          | PROMIS>1.5 SD      | PROMIS>1.5 SD                               | PROMIS>1.5 SD |
| Luthar et al., 2020 <sup>93</sup>      | US             | Cross-Sectional | 76.3 | 2078  | 51.8 | -                 | WBI>1.5 SD         | WBI>1.5 SD                                  | -             |
| Ma et al., 2021a <sup>94</sup>         | China          | Cross-Sectional | 85.8 | 17740 | -    | 12.87±2.65        | CQ                 | CQ                                          | CQ            |
| Ma et al., 2021b <sup>95</sup>         | China          | Cross-Sectional | 98.2 | 668   | 49.7 | 11.32±2.74        | SMFQ-P>11          | -                                           | -             |
| Mactavish et al., 2021 <sup>96</sup>   | Canada         | Cross-Sectional | -    | 190   | 49.5 | 10.83±1.45        | SMFQ               | -                                           | -             |
| Magklara et al., 2022 <sup>97</sup>    | Greece         | Cross-Sectional | -    | 1232  | 48.1 | -                 | -                  | -                                           | CQ            |
| Mansfield et al., 2021 <sup>98</sup>   | United Kingdom | Cross-Sectional | 15.5 | 10784 | 62.9 | -                 | RCADS-D T-Score>70 | RCADS-A T-Score>70                          | -             |
| McArthur et al., 2021 <sup>99</sup>    | Canada         | Cross-Sectional | 65.8 | 846   | 47.0 | 9.85±0.78         | BASC-3 T-Score≥60  | BASC-3 T-Score≥60                           | -             |
| McGuire et al., 2021a <sup>100</sup>   | US             | Cross-Sectional | -    | 13002 | 53.0 | 16.3±1.2          | PHQ-9≥5            | GAD-7≥5                                     | -             |
| McGuire et al., 2021b <sup>101</sup>   | US             | Cross-Sectional | -    | 3243  | 58.0 | 16.2±1.2          | PHQ-9≥5            | -                                           | -             |
| McGuire et al., 2022a <sup>102</sup>   | US             | Cross-Sectional | -    | 1906  | 48.8 | 16.0±1.2          | PHQ-9≥5            | -                                           | -             |
| McGuire et al., 2022b <sup>103</sup>   | US             | Cross-Sectional | -    | 559   | 43.6 | 15.7±1.2          | PHQ-9≥5            | GAD-7≥5                                     | -             |
| McGuire et al., 2022c <sup>104</sup>   | US             | Cross-Sectional | -    | 4693  | 52.0 | 16.1±1.3          | PHQ-9≥10           | GAD-7≥10                                    | -             |
| Min et al., 2021 <sup>105</sup>        | South Korea    | Cross-Sectional | 84.1 | 159   | -    | 16.0±0.3          | CES-D≥16           | -                                           | -             |
| Mo et al., 2020 <sup>106</sup>         | China          | Cross-Sectional | 89.2 | 5392  | 45.5 | 7-16 <sup>a</sup> | -                  | SCARED≥23                                   | -             |
| Mohler-Kuo et al., 2021 <sup>107</sup> | Switzerland    | Cross-Sectional | -    | 1146  | 50.3 | 14.3±1.5          | PHQ-2≥3            | SCAS-C (Brief)≥7.5 for girls, ≥5.5 for boys | CQ            |
| Moitra et al., 2022 <sup>108</sup>     | India          | Cross-Sectional | -    | 1298  | 46.7 | 13.2±1.2          | PHQ-2≥3            | -                                           | PSQI>5        |
| Molu et al., 2022 <sup>109</sup>       | Turkey         | Cross-Sectional | 17.0 | 122   | 51.6 | 4.81±0.9          | -                  | -                                           | CSHQ>41       |
| Monnier et al., 2021 <sup>110</sup>    | France         | Cross-Sectional | -    | 5698  | 49.3 | 8-9 <sup>b</sup>  | -                  | -                                           | CQ            |
| Murata et al., 2020 <sup>111</sup>     | US             | Cross-Sectional | -    | 583   | 79.9 | 15.8±1.4          | PHQ-9≥10           | GAD-7≥10                                    | ISI           |

|                                             |                        |                 |      |       |      |                    |                           |                           |                           |
|---------------------------------------------|------------------------|-----------------|------|-------|------|--------------------|---------------------------|---------------------------|---------------------------|
| Nakachi et al., 2021 <sup>112</sup>         | Japan                  | Cross-Sectional | -    | 547   | 47.0 | 11.4±3.6           | -                         | -                         | CQ                        |
| O'Kane et al., 2021 <sup>113</sup>          | Ireland                | Longitudinal    | 33.0 | 94    | 100  | 12-14 <sup>b</sup> | -                         | -                         | PSQI>5                    |
| Oliva et al., 2021 <sup>114</sup>           | Italy                  | Cross-Sectional | -    | 2426  | -    | 6-18 <sup>b</sup>  | CES-DC                    | SCARED                    | -                         |
| Orgilés et al., 2020 <sup>115</sup>         | Portugal, Spain, Italy | Cross-Sectional | -    | 515   | 45.8 | 8.98±4.29          | SMFQ-P>11                 | SCAS-P-8>7.5              | -                         |
| Ozbaran et al., 2022 <sup>116</sup>         | Turkey                 | Cross-Sectional | -    | 71    | 52.1 | 6-18 <sup>b</sup>  | CDI≥19                    | SCARED≥25                 | -                         |
| Paiva et al., 2021 <sup>117</sup>           | Brazil                 | Cross-Sectional | -    | 530   | 50.2 | 6-12 <sup>b</sup>  | -                         | CQ                        | -                         |
| Peng et al., 2022 <sup>118</sup>            | China                  | Cross-Sectional | -    | 39751 | 52.3 | 14.8±1.7           | PHQ-9≥5                   | GAD-7≥5                   | -                         |
| Pieh et al., 2021 <sup>119</sup>            | Austria                | Cross-Sectional | -    | 3052  | 70.1 | 16.5±1.4           | PHQ-9≥11                  | GAD-7≥11                  | ISI≥15                    |
| Pisano et al., 2021 <sup>120</sup>          | Italy                  | Cross-Sectional | 69.1 | 326   | 24.2 | 15.9±1.3           | MFQ-SF≥12                 | STAI≥40                   | -                         |
| Pizarro-Ruiz et al., 2021 <sup>121</sup>    | Spain                  | Cross-Sectional | 74.9 | 590   | 55.3 | 8-18 <sup>b</sup>  | SENA                      | SENA                      | -                         |
| Puteikis et al., 2022 <sup>122</sup>        | Lithuania              | Cross-Sectional | 97.7 | 628   | 70.4 | 16.1±1.2           | BDI≥16                    | GAD-7≥8                   | PSQI>5                    |
| Qi et al., 2020a <sup>123i</sup>            | China                  | Cross-Sectional | 98.1 | 9554  | -    | -                  | -                         | GAD-7≥5                   | -                         |
| Qi et al., 2020b <sup>124</sup>             | China                  | Cross-Sectional | 97.5 | 7202  | 53.6 | 16 (14-18)         | PHQ-9≥5                   | GAD-7≥5                   | -                         |
| Qi et al., 2021 <sup>125i</sup>             | China                  | Cross-Sectional | 98.1 | 9554  | 52.1 | -                  | CES-D>15                  | -                         | -                         |
| Ravens-Sieberer et al., 2021 <sup>126</sup> | Germany                | Longitudinal    | -    | 1586  | 49.7 | 12.67±2.29         | PHQ-2≥3                   | SCARED≥25                 | -                         |
| Ren et al., 2021 <sup>127</sup>             | China                  | Cross-Sectional | 99.7 | 1771  | 48.2 | 10-19 <sup>b</sup> | PHQ-9≥5                   | GAD-7≥5                   | SRSS≥23                   |
| Rojas et al., 2022 <sup>128</sup>           | Mexico                 | Cross-Sectional | -    | 209   | 54.1 | 8.91±2.30          | -                         | -                         | CSHQ>41                   |
| Sarvari et al., 2022 <sup>129</sup>         | Iran                   | Cross-Sectional | -    | 150   | 0    | 14.41 <sup>c</sup> | -                         | BAI-II                    | -                         |
| Selçuk et al., 2021 <sup>130</sup>          | Turkey                 | Cross-Sectional | -    | 447   | 61.7 | 15±2               | DSM-5-DS-C T-Score≥55     | DSM-5-AS-C T-Score≥55     | -                         |
| She et al., 2021 <sup>131</sup>             | Hong Kong              | Cross-Sectional | 72.5 | 3136  | 51.9 | 13.6±1.3           | CES-D≥16                  | -                         | -                         |
| Siachpazidou et al., 2021 <sup>132</sup>    | Greece                 | Cross-Sectional | -    | 482   | 46.1 | 8.1±2.2            | -                         | CQ                        | -                         |
| Sicouri et al., 2022 <sup>133</sup>         | Australia              | Cross-Sectional | -    | 1327  | 45.4 | 10.4±3.9           | RCADS-25-P                | RCADS-25-P                | -                         |
| Sifat et al., 2022 <sup>134</sup>           | Bangladesh             | Cross-Sectional | -    | 60    | 50.0 | 13-15 <sup>b</sup> | Semi-Structured Interview | Semi-Structured Interview | Semi-Structured Interview |
| Silva et al., 2022 <sup>135</sup>           | Brazil                 | Cross-Sectional | -    | 157   | 59.9 | -                  | -                         | -                         | PSQI>5                    |
| Song, 2020 <sup>136</sup>                   | China                  | Cross-Sectional | 95.3 | 1300  | -    | -                  | -                         | SCL-90≥2                  | SCL-90≥2                  |
| Spiratos, 2021 <sup>137</sup>               | US                     | Cross-Sectional | 81.4 | 319   | 57.1 | 15.51±1.18         | CES-D≥16                  | -                         | -                         |
| Stewart et al., 2022 <sup>138</sup>         | Scotland               | Cross-Sectional | 89.6 | 899   | 51.0 | 15.89±0.88         | RCADS-25D T-Score≥70      | RCADS-25A T-Score≥70      | -                         |
| Su & Sun, 2020 <sup>139</sup>               | China                  | Cross-Sectional | -    | 1708  | 48.9 | -                  | CDI≥20                    | -                         | -                         |

|                                           |                 |                 |      |        |      |                         |                   |                   |                  |
|-------------------------------------------|-----------------|-----------------|------|--------|------|-------------------------|-------------------|-------------------|------------------|
| Tamarit et al., 2020 <sup>140</sup>       | Spain           | Cross-Sectional | -    | 523    | 63.1 | 14.89±1.13              | DASS-21D≥10       | DASS-21A≥8        | -                |
| Tang & Pang, 2020 <sup>141</sup>          | China           | Cross-Sectional | -    | 873    | 47.7 | -                       | CDI≥19            | SAS≥50            | -                |
| Tang & Ying, 2020 <sup>142</sup>          | China           | Cross-Sectional | -    | 3512   | 50.9 | 14.0±1.6                | MMHI-60≥2         | MMHI-60≥2         | -                |
| Tang et al., 2021 <sup>143</sup>          | China           | Cross-Sectional | 98.9 | 4391   | 49.5 | 11.9±2.3                | DASS-21D≥10       | DASS-21A≥8        | -                |
| Teker et al., 2021 <sup>144</sup>         | Turkey          | Cross-Sectional | -    | 428    | 68.0 | 16 (13-19)              | -                 | -                 | PSQI>5           |
| Top et al., 2022 <sup>145</sup>           | Turkey          | Cross-Sectional | -    | 1040   | 49.2 | 9.16±2.05               | -                 | -                 | CSHQ>41          |
| Türk et al., 2021 <sup>146</sup>          | Turkey          | Cross-Sectional | -    | 3058   | 68.0 | 15 (11-18) <sup>d</sup> | RCADS-D           | RCADS-A           | -                |
| Ursache et al., 2022 <sup>147</sup>       | US              | Cross-Sectional | -    | 285    | 55.1 | 4.6 <sup>c</sup>        | -                 | -                 | PROMIS           |
| Vaidya et al., 2022 <sup>148</sup>        | India           | Cross-Sectional | -    | 1641   | 52.2 | 18.9±2.2                | DASS-21D≥10       | DASS-21A≥8        | -                |
| Valero-Moreno et al., 2022 <sup>149</sup> | Spain & Ecuador | Cross-Sectional | -    | 476    | 70.8 | 15.62±1.22              | DASS-21D≥10       | DASS-21A≥8        | -                |
| Villanti et al., 2022 <sup>150</sup>      | US              | Cross-Sectional | -    | 212    | -    | 15.0±1.6                | PHQ-2≥3           | GAD-2≥3           | -                |
| Vivechana et al., 2021 <sup>151</sup>     | Nepal           | Cross-Sectional | 66.8 | 193    | 57.5 | 14.6±1.2                | -                 | CQ                | -                |
| Wang & Sun, 2020 <sup>152</sup>           | China           | Cross-Sectional | -    | 1580   | 51.4 | -                       | -                 | SCARED≥23         | -                |
| Wang & Xu, 2020 <sup>153</sup>            | China           | Cross-Sectional | 89.7 | 410    | 68.5 | -                       | -                 | GAD-7≥5           | -                |
| Wang et al., 2020a <sup>154f</sup>        | China           | Cross-Sectional | 93.6 | 396    | 49.7 | 12.8±2.6                | DSRS≥15           | -                 | -                |
| Wang et al., 2020b <sup>155</sup>         | China           | Cross-Sectional | -    | 2727   | -    | -                       | -                 | -                 | PSQI>5           |
| Wang et al., 2021a <sup>156</sup>         | China           | Cross-Sectional | 98.1 | 16094  | 48.1 | 3-6 <sup>b</sup>        | -                 | -                 | CSHQ>41          |
| Wang et al., 2021b <sup>157</sup>         | China           | Cross-Sectional | 84.6 | 1071   | 45.1 | 7.64±1.55               | CBCL              | -                 | -                |
| Wang et al., 2022a <sup>158</sup>         | China           | Longitudinal    | 91.7 | 1790   | 49.2 | 14.92±1.55              | CES-D≥16          | GAD-7≥5           | PSQI>7           |
| Wang et al., 2022b <sup>159</sup>         | China           | Cross-Sectional | 99.7 | 21085  | 52.9 | -                       | -                 | GAD-7≥5           | -                |
| Wearick-Silva et al., 2021 <sup>160</sup> | Brazil          | Cross-Sectional | -    | 657    | -    | 0-17 <sup>b</sup>       | -                 | -                 | BISQ, SDSC, PSQI |
| Wen et al., 2022 <sup>161</sup>           | China           | Cross-Sectional | 83.2 | 7377   | 51.5 | 14 (9-17) <sup>d</sup>  | CES-D≥16          | -                 | -                |
| Wesley et al., 2022 <sup>162</sup>        | US              | Cross-Sectional | 48.6 | 3494   | 58.1 | 16.24±1.09              | PROMIS T-Score≥65 | PROMIS T-Score≥65 | -                |
| Windiani et al., 2021 <sup>163</sup>      | Indonesia       | Cross-Sectional | -    | 204    | 48.5 | 16 (15-18) <sup>e</sup> | -                 | -                 | PSQI>5           |
| Xie et al., 2020 <sup>164</sup>           | China           | Cross-Sectional | 76.6 | 1784   | 43.3 | -                       | CDI-S≥7           | SCARED≥25         | -                |
| Xie et al., 2022 <sup>165</sup>           | China           | Cross-Sectional | 76.6 | 1224   | 43.7 | 9.3±1.1                 | CDI-S>4           | SCARED≥23         | -                |
| Xu et al., 2021 <sup>166</sup>            | China           | Cross-Sectional | -    | 373216 | 48.2 | 15.24±1.59              | -                 | GAD-7≥5           | -                |
| Xu et al., 2022 <sup>167</sup>            | China           | Cross-Sectional | 94.8 | 386432 | 48.0 | 14.5±1.7                | -                 | GAD-7≥10          | -                |

|                                    |        |                 |      |       |      |                         |                    |                   |                |
|------------------------------------|--------|-----------------|------|-------|------|-------------------------|--------------------|-------------------|----------------|
| Xue et al., 2021 <sup>168</sup>    | China  | Cross-Sectional | -    | 1650  | 43.4 | -                       | CDI-5 $\geq$ 4     | SCARED $\geq$ 23  | -              |
| Yakşı et al., 2021 <sup>169</sup>  | Turkey | Cross-Sectional | 38.2 | 506   | 60.7 | 17 (14-21) <sup>a</sup> | CDI $\geq$ 19      | -                 | -              |
| Yin et al., 2022 <sup>170</sup>    | China  | Cross-Sectional | -    | 1027  | 57.6 | 15.71 $\pm$ 1.36        | PHQ-9 $\geq$ 10    | GAD-7 $\geq$ 10   | -              |
| Yu et al., 2020 <sup>171</sup>     | China  | Cross-Sectional | -    | 2074  | 47.6 | -                       | CQ                 | CQ                | -              |
| Yue et al., 2020 <sup>172</sup>    | China  | Cross-Sectional | 71.9 | 1360  | 46.0 | 10.56 $\pm$ 1.79        | SAS $\geq$ 50      | CES-DC $\geq$ 15  | -              |
| Zainel et al., 2021 <sup>173</sup> | Qatar  | Cross Sectional | -    | 6608  | 49.2 | 7-18 <sup>b</sup>       | KADS               | SCAS              | -              |
| Zhai et al., 2021 <sup>174</sup>   | China  | Cross Sectional | -    | 10569 | 49.7 | 15.94 $\pm$ 1.45        | -                  | SAS $\geq$ 50     | PSQI $>$ 5     |
| Zhan et al., 2022 <sup>175</sup>   | China  | Cross Sectional | -    | 1355  | 47.3 | 12.47 $\pm$ 1.67        | -                  | -                 | YSIS $\geq$ 22 |
| Zhang et al., 2020a <sup>176</sup> | China  | Longitudinal    | 93.1 | 1241  | 40.7 | 12.6 $\pm$ 1.4          | MFQ $\geq$ 27      | HBQ $\geq$ 4.17   | -              |
| Zhang et al., 2020b <sup>177</sup> | China  | Cross-Sectional | 91.4 | 563   | 48.1 | -                       | MMHI-60 $\geq$ 2   | MMHI-60 $\geq$ 2  | -              |
| Zhang et al., 2020c <sup>178</sup> | China  | Cross-Sectional | -    | 1018  | 53.5 | 16.61 $\pm$ 1.06        | PHQ-9 $\geq$ 5     | GAD-7 $\geq$ 5    | -              |
| Zhang et al., 2020d <sup>179</sup> | China  | Cross-Sectional | 87.4 | 1025  | 76.3 | 15.56 $\pm$ 1.89        | DASS-21D $\geq$ 10 | DASS-21A $\geq$ 8 | -              |
| Zhang et al., 2021 <sup>180</sup>  | China  | Cross-Sectional | -    | 22380 | 47.2 | 12-17 <sup>b</sup>      | PHQ-9 $\geq$ 5     | GAD-7 $\geq$ 5    | -              |
| Zhang et al., 2022 <sup>181</sup>  | China  | Cross Sectional | -    | 3471  | 48.4 | 14.1 $\pm$ 2.6          | PHQ-9 $\geq$ 5     | GAD-7 $\geq$ 5    | -              |
| Zhao et al., 2022 <sup>182</sup>   | China  | Cross-Sectional | 83.0 | 7544  | -    | 6-17 <sup>b</sup>       | DASS-21D $\geq$ 10 | DASS-21A $\geq$ 8 | CQ             |
| Zhen et al., 2022 <sup>183</sup>   | China  | Cross-Sectional | -    | 683   | 44.1 | 16.06 $\pm$ 0.56        | CES-DC $\geq$ 16   | -                 | -              |
| Zhong et al., 2021 <sup>184</sup>  | China  | Cross-Sectional | -    | 1766  | 50.6 | -                       | -                  | SCARED $\geq$ 25  | -              |
| Zhou et al., 2020a <sup>185</sup>  | China  | Cross-Sectional | 99.3 | 8079  | 53.5 | 16 (12-18)              | PHQ-9 $\geq$ 5     | GAD-7 $\geq$ 5    | -              |
| Zhou et al., 2020b <sup>186</sup>  | China  | Cross-Sectional | 95.1 | 4805  | 100  | 15 (11-18)              | CES-D $\geq$ 16    | -                 | -              |
| Zhou et al., 2020c <sup>187</sup>  | China  | Cross-Sectional | 96.2 | 7736  | 53.8 | 17.4 $\pm$ 2.7          | PHQ-9 $\geq$ 5     | GAD-7 $\geq$ 5    | PSQI $>$ 5     |
| Zhou et al., 2020d <sup>188</sup>  | China  | Cross-Sectional | -    | 2714  | 47.5 | -                       | -                  | CQ                | CQ             |
| Zhou et al., 2021 <sup>189</sup>   | China  | Cross Sectional | -    | 1108  | 50.9 | 16.39 $\pm$ 0.80        | PHQ-9 $\geq$ 5     | GAD-7 $\geq$ 5    | SRSS $\geq$ 23 |
| Zhu et al., 2020 <sup>190</sup>    | China  | Cross-Sectional | 99.5 | 1264  | 44.1 | -                       | -                  | SCARED $\geq$ 23  | -              |
| Zhu et al., 2021 <sup>191h</sup>   | China  | Cross-Sectional | 56.1 | 5175  | 48.3 | 9-17 <sup>b</sup>       | PHQ-9 $\geq$ 5     | -                 | -              |

<sup>a</sup>Age is reported as mean $\pm$ SD or median (IQR) unless otherwise indicated.

<sup>b</sup>Age is reported as range.

<sup>c</sup>Mean age is reported. No variance information was reported by the study authors.

<sup>d</sup>Age is reported as mean (range).

<sup>e</sup>Age is reported as median (range).

<sup>f</sup>Li et al., 2020 and Wang et al., 2020a assessed the same sample of youths.

<sup>g</sup>Liao & Li, 2021 and Liao et al., 2022 assessed the same sample of youths.

<sup>h</sup>Liu et al., 2021a and Zhu et al., 2021 assessed the same sample of youths.

<sup>i</sup>Chen et al., 2021, Qi et al., 2020a, and Qi et al., 2021 assessed the same sample of youths.

<sup>j</sup>For Fischer et al., 2022, only results pertaining to the KLIK cohort were included in the review as other cohorts involved populations with special clinical needs.

<sup>k</sup>Han et al., 2021, Jung et al., 2022, Kim et al., 2022b, and Lee et al., 2022b assessed the same sample of youths.

<sup>l</sup>For Lee et al., 2022c, only data from the 2021 cohort was included in the review as the 2020 cohort included the same sample of youths as Han et al., 2021, Jung et al., 2022, Kim et al., 2022b, and Lee et al., 2022b.



**Abbreviations:** **SD** Standard Deviation; **IQR** Interquartile Range; **CQ** Custom Questionnaire; **BDI-II** Beck Depression Inventory-II; **BDI** Beck Depression Inventory; **CDI-5** Children's Depression Inventory-Short Version; **CDI** Children's Depression Inventory; **CE5-D** Center for Epidemiologic Studies Depression Scale; **DASS-21D** Depression, Anxiety, and Stress Scale-21 Items, Depression Subscale; **DSM-5-DS-C** Diagnostic and Statistical Manual of Mental Disorders, 5<sup>th</sup> Edition, Level 2 Depression Scale for Children Aged 11-17; **DSM-5-DS-P** Diagnostic and Statistical Manual of Mental Disorders, 5<sup>th</sup> Edition, Level 2 Depression Scale for Parents of Child; **DSRS** Depression Self-Rating Scale; **KADS** 11-Items Kutcher Adolescent Depression Scale; **MFQ-C** Mood and Feelings Questionnaire for Children; **MFQ-SF** Mood and Feelings Questionnaire-Short Form; **MFQ** Mood and Feelings Questionnaire; **MMHI-60** Mental Health Inventory of Middle School Students; **PFC** Preschool Feelings Checklist; **PHQ-2** Patient Health Questionnaire-2; **PHQ-9** Patient Health Questionnaire-9; **PHQ-A** Patient Health Questionnaire Modified for Adolescents; **RCADS-25D** Revised Children's Anxiety and Depression Scale-25 Items, Depression Subscale; **RCADS-D** Revised Children's Anxiety and Depression Scale, Depression Subscale; **SDS** Self-Rating Depression Scale; **SMFQ-P** Short Mood and Feelings Questionnaire-Parent Version; **YSR/11-18** Youth Self-Report for Ages 11-18; **BAI** Beck Anxiety Inventory; **BASC-3** Behavior Assessment System for Children, 3<sup>rd</sup> Edition; **CAQ** Children's Anxiety Questionnaire; **DASS-21A** Depression, Anxiety, and Stress Scale-21 Items, Anxiety Subscale; **DSM-5-AS-C** Diagnostic and Statistical Manual of Mental Disorders, 5<sup>th</sup> Edition, Level 2 Anxiety Scale for Children Aged 11-17; **DSM-5-AS-P** Diagnostic and Statistical Manual of Mental Disorders, 5<sup>th</sup> Edition, Level 2 Anxiety Scale for Parents of Child; **GAD-2** Generalized Anxiety Disorder-2; **GAD-7** Generalized Anxiety Disorder-7; **MacArthur HBQ** MacArthur Health and Behavior Questionnaire; **PROMIS** Patient Reported Outcomes Measurement Information System; **RCADS-25A** Revised Children's Anxiety and Depression Scale-25 Items, Anxiety Subscale; **RCADS-A** Revised Children's Anxiety and Depression Scale, Anxiety Subscale; **SAS** Self-Rating Anxiety Scale; **SCARED** Screen for Child Anxiety Related Disorders; **SCAS-C** Spence Children's Anxiety Scale-Child Version; **SCAS-P** Spence Children's Anxiety Scale-Parent Version; **SCL-90** Symptom Checklist-90; **STAI** State-Trait Anxiety Inventory; **AIS** Athens Insomnia Scale; **CSHQ** Children's Sleep Habits Questionnaire; **ISI** Insomnia Severity Index; **PSQI** Pittsburgh Sleep Quality Index; **SDSC** Sleep Disturbance Scale for Children; **SRSS** Self-Rating Scale of Sleep; **YSIS** Youth Self-Rating Insomnia Scale; **MHI-5** Mental Health Inventory-5; **RADS-2** Reynolds Adolescent Depression Scale, 2<sup>nd</sup> Edition; **MASC** Multidimensional Anxiety Scale for Children; **HSCL-25D** Hopkins Symptom Checklist-25, Depression Subscale; **HSCL-25A** Hopkins Symptom Checklist-25, Anxiety Subscale; **HADS** Hospital Anxiety and Depression Scale; **WBI** Well-Being Inventory; **SMFQ** Short Mood and Feelings Questionnaire.

## Supplementary References

1. Adams D.P., J.R. Holt, J.A. Martin, et al. 2022. The effect of COVID-19 lockdown on PHQ depression screening scores for high school athletes. *Int. J. Environ. Res. Public Health* 19: 9943.
2. Adegboye D., J. Lennon, O. Batterbee, et al. 2022. Understanding de novo onset of anxiety during COVID-19: Pre-pandemic socio-emotional functioning in vulnerable children. *JCPP Adv* 2: e12076.
3. AlAzzam M., S. Abuhammad, A. Abdalrahim, et al. 2021. Predictors of depression and anxiety among senior high school students during COVID-19 pandemic: The context of home quarantine and online education. *J. Sch. Nurs.* 37: 241–248.
4. Albrecht J.N., H. Werner, N. Rieger, et al. 2022. Sleep and health-related characteristics among adolescents during COVID-19: An update. *Int. J. Environ. Res. Public Health* 19: 5078.
5. Alnamnakani M., S. Alenezi, H. Temsah, et al. 2022. Psychosocial impact of lockdown on children due to COVID-19: A cross-sectional study. *Clin. Pract. Epidemiol. Ment. Health* 18:.
6. Y. Alqassim A., M. S. Mahfouz, M. M. Hakami, et al. 2022. Depression, anxiety, stress and their association with the use of electronic devices among adolescents during the COVID-19 pandemic. *Int. J. Ment. Health Promot.* 24: 251–262.
7. Cohen Arazi L., M. García, D. Berdecio Salvatierra, et al. 2022. Mood, emotions, and behaviors of children during the COVID-19 pandemic in Autonomous City of Buenos Aires. *Arch. Argent. Pediatr.* 120: 106–110.
8. Argiansya F., R. Soedjadhi, R.M. Indra, et al. 2021. Electronic media use and sleep disorders among adolescents during the COVID-19 pandemic. *Sleep Disord.* 2021: 2096944.
9. Asanov I., F. Flores, D. McKenzie, et al. 2021. Remote-learning, time-use, and mental health of Ecuadorian high-school students during the COVID-19 quarantine. *World Dev.* 138: 105225.
10. Garcia de Avila M.A., P.T. Hamamoto Filho, F.L. da S. Jacob, et al. 2020. Children's anxiety and factors related to the COVID-19 pandemic: An exploratory study using the Children's Anxiety Questionnaire and the Numerical Rating Scale. *Int. J. Environ. Res. Public Health* 17: 5757.
11. Bani-Issa W., H. Radwan, R. Saqan, et al. 2022. Association between quality of sleep and screen time during the COVID-19 outbreak among adolescents in the United Arab Emirates. *J. Sleep Res.*
12. Baptista A.S., I.M. Prado, M.F. Perazzo, et al. 2021. Can children's oral hygiene and sleep routines be compromised during the COVID-19 pandemic? *Int. J. Paediatr. Dent.* 31: 12–19.
13. Bazett-Jones D.M., M.C. Garcia, J.A. Taylor-Haas, et al. 2021. Changes in motivation, socialization, wellness and mental health in youth long-distance runners during COVID-19 social distancing restrictions. *Front Sports Act Living* 3: 696264.
14. Becker S.P., M.R. Dvorsky, R. Breaux, et al. 2021. Prospective examination of adolescent sleep patterns and behaviors before and during COVID-19. *Sleep* 44:.
15. Berki T. & B.F. Pikó. 2021. Sedentary lifestyle may contribute to the risk of depression during the COVID-19 pandemic : A snapshot of Hungarian adolescents. *Eur. J. Ment. Health* 16: 99–119.
16. Bhatta A., R.K. Kafley, A. Yadav, et al. 2021. Anxiety during COVID -19 among school going adolescents of six private schools in Kathmandu valley: A descriptive cross-sectional study. *JNMA J. Nepal Med. Assoc.* 59: 231–233.
17. Black S.R., M.L. Evans, L. Aaron, et al. 2021. Covariance between parent and child symptoms before and during the COVID-19 pandemic. *J. Pediatr. Psychol.* 46: 1182–1194.
18. Tural Büyük E. & Z. Öztürk Savaş. 2022. Effect of internet addiction on the sleep quality of adolescents during COVID-19 pandemia duration period. *J. Turk. Sleep Med.* 9: 232–237.
19. Cao Y., L. Huang, T. Si, et al. 2021. The role of only-child status in the psychological impact of COVID-19 on mental health of Chinese adolescents. *J. Affect. Disord.* 282: 316–321.

20. Cao C., L. Wang, R. Fang, et al. 2022. Anxiety, depression, and PTSD symptoms among high school students in china in response to the COVID-19 pandemic and lockdown. *J. Affect. Disord.* 296: 126-129.
21. Castillo-Martínez M., M. Castillo-Martínez, M. Ferrer, et al. 2020. Depresión infantojuvenil y otros aspectos de salud mental durante el confinamiento y la pandemia por SARS-CoV-2/COVID-19: encuesta en contexto escolar. *An. Pediatr. (Engl. Ed.)* 96: 61-64.
22. Cheah C.S.L., C. Wang, H. Ren, et al. 2020. COVID-19 racism and mental health in Chinese American families. *Pediatrics* 146: e2020021816.
23. Chen F., D. Zheng, J. Liu, et al. 2020. Depression and anxiety among adolescents during COVID-19: A cross-sectional study. *Brain Behav. Immun.* 88: 36-38.
24. Chen S., Z. Cheng & J. Wu. 2020. Risk factors for adolescents' mental health during the COVID-19 pandemic: a comparison between Wuhan and other urban areas in China. *Global. Health* 16: 96.
25. Chen Q., Y. Du, H. Zhu, et al. 2020. Senior high school students' mental status in home setting during COVID-19 pandemic. *China Journal of Health Psychology* 28: 1654-1660.
26. Chen X., H. Qi, R. Liu, et al. 2021. Depression, anxiety and associated factors among Chinese adolescents during the COVID-19 outbreak: a comparison of two cross-sectional studies. *Transl. Psychiatry* 11: 148.
27. Chi X., K. Liang, S.-T. Chen, et al. 2021. Mental health problems among Chinese adolescents during the COVID-19: The importance of nutrition and physical activity. *Int. J. Clin. Health Psychol.* 21: 100218.
28. Chi S., M.-S. Ko, J.-H. Lee, et al. 2022. Smartphone usage and sleep quality in Korean middle school students during the COVID-19 pandemic. *Psychiatry Investig.* 19: 722-728.
29. Choukas-Bradley S., A.J. Maheux, S.R. Roberts, et al. 2022. Picture perfect during a pandemic? Body image concerns and depressive symptoms in U.S. adolescent girls during the COVID-19 lockdown. *J. Child. Media* 1-12.
30. Crescentini C., S. Feruglio, A. Matiz, et al. 2020. Stuck outside and inside: An exploratory study on the effects of the COVID-19 outbreak on Italian parents and children's internalizing symptoms. *Front. Psychol.* 11: 586074.
31. Curatola A., S. Ferretti, A. Gatto, et al. 2022. The effects of COVID-19 pandemic on Italian school-aged children: Sleep-related difficulties and trauma reactions. *J. Child Neurol.* 37: 8830738221096194.
32. Dai X.R., T.K. Liu & Y.W. Liu. 2020. Psychological status and influencing factors of high school students in Chengdu during the outbreak of COVID-19. *Modern Preventive Medicine* 47: 3911-3914.
33. Dale R., A. Jesser, C. Pieh, et al. 2022. Mental health burden of high school students, and suggestions for psychosocial support, 1.5 years into the COVID-19 pandemic in Austria. *Eur. Child Adolesc. Psychiatry.*
34. Deb S., S. Kar, S. Deb, et al. 2022. A cross-sectional study on mental health of school students during the COVID-19 pandemic in India. *Data (Basel)* 7: 99.
35. Denerel N., S. Şenışık, O. Köyağasioğlu, et al. 2021. Effects of long-duration home isolation linked to the COVID-19 pandemic on mental health of adolescent athletes. *Pediatr. Exerc. Sci.* 33: 170-176.
36. Ding F., Y. Jia, X. Xiong, et al. 2022. The protective role of parental involvement at home in negative psychological outcomes among Chinese adolescents during the COVID-19 epidemic. *J. Affect. Disord.* 308: 123-129.
37. Dong H., F. Yang, X. Lu, et al. 2020. Internet addiction and related psychological factors among children and adolescents in China during the Coronavirus disease 2019 (COVID-19) epidemic. *Front. Psychiatry* 11: 00751.
38. Dönmez Y.E. & Ö. Uçur. 2021. Frequency of anxiety, depression, and irritability symptoms in children during the COVID-19 outbreak and potential risk factors associated with these symptoms. *J. Nerv. Ment. Dis.* 209: 727-733.
39. Duan L., X. Shao, Y. Wang, et al. 2020. An investigation of mental health status of children and adolescents in china during the outbreak of COVID-19. *J. Affect. Disord.* 275: 112-118.
40. El Refay A.S., S.A. Hashem, H.H. Mostafa, et al. 2021. Sleep quality and anxiety symptoms in Egyptian children and adolescents during COVID-19 pandemic lockdown. *Bull. Natl. Res. Cent.* 45: 134.

41. Fidanci İ., H. Aksoy, D. Yengil Taci, et al. 2021. Evaluation of the effect of the COVID-19 pandemic on sleep disorders and nutrition in children. *Int. J. Clin. Pract.* 75: e14170.
42. Fischer K., J.M. Tieskens, M.A.J. Luijten, et al. 2022. Internalizing problems before and during the COVID-19 pandemic in independent samples of Dutch children and adolescents with and without pre-existing mental health problems. *Eur. Child Adolesc. Psychiatry.*
43. Fogarty A., S. Brown, D. Gartland, et al. 2022. Psychosocial factors associated with adolescent depressive and anxiety symptoms during the COVID-19 pandemic. *Int. J. Behav. Dev.* 016502542210841.
44. Forte A., M. Orri, M. Brandizzi, et al. 2021. "My Life during the Lockdown": Emotional Experiences of European Adolescents during the COVID-19 Crisis. *Int. J. Environ. Res. Public Health* 18: 7638.
45. Ghorbani S., M. Afshari, M. Eckelt, et al. 2021. Associations between physical activity and mental health in Iranian adolescents during the COVID-19 pandemic: An accelerometer-based study. *Children (Basel)* 8: 1022.
46. Giannini D.T., C.M. Tavares, M. Takey, et al. 2022. Adolescents emotional state and behavioral and dietary habit changes during isolation due to the COVID-19 pandemic. *J Am Nutr Assoc* 41: 415–423.
47. Giannopoulou I., V. Efstathiou, G. Triantafyllou, et al. 2021. Adding stress to the stressed: Senior high school students' mental health amidst the COVID-19 nationwide lockdown in Greece. *Psychiatry Res.* 295: 113560.
48. Gladstone T.R.G., J.A.J. Schwartz, P. Pössel, et al. 2021. Depressive symptoms among adolescents: Testing vulnerability-stress and protective models in the context of COVID-19. *Child Psychiatry Hum. Dev.*
49. Glynn L.M., E.P. Davis, J.L. Luby, et al. 2021. A predictable home environment may protect child mental health during the COVID-19 pandemic. *Neurobiol. Stress* 14: 100291.
50. Guo P., X. Li, S. Liu, et al. 2020. Status and influencing factors of anxiety among adolescents in Anhui during the epidemic of COVID-19. *Sichuan Mental Health* 33: 501–505.
51. Håkansson A., K. Moesch & G. Kenttä. 2022. COVID-19-related impact on mental health and career uncertainty in student-athletes-Data from a cohort of 7,025 athletes in an elite sport high school system in Sweden. *Front Sports Act Living* 4: 943402.
52. Hamid M.A., A. Rahat Qureshi, S. Kapoor, et al. 2022. Mental health consequences of the COVID-19 pandemic among Ontario's youth: A cross-sectional study. *Cureus* 14: e22526.
53. Han J.M. & H. Song. 2021. Effect of subjective economic status during the COVID-19 pandemic on depressive symptoms and suicidal ideation among south Korean adolescents. *Psychol. Res. Behav. Manag.* 14: 2035–2043.
54. He K.L., X.G. Chen & J.J. Song. 2020. [The psychological impact of the novel coronavirus pneumonia epidemic on middle school students and suggestions]. *Sichuan Education* 11–13.
55. He Y., X.S. Li, J. Zhao, et al. 2021. Family resilience, media exposure, and children's mental health in China during COVID-19. *Fam. J. Alex. Va* 106648072110618.
56. Hermosillo-de-la-Torre A.E., S.M. Arteaga-de-Luna, D.L. Acevedo-Rojas, et al. 2021. Psychosocial correlates of suicidal behavior among adolescents under confinement due to the COVID-19 pandemic in Aguascalientes, Mexico: A cross-sectional population survey. *Int. J. Environ. Res. Public Health* 18: 4977.
57. Hertz M.F., G. Kilmer, J. Verlenden, et al. 2022. Adolescent mental health, connectedness, and mode of school instruction during COVID-19. *J. Adolesc. Health* 70: 57–63.
58. Hou T.-Y., X.-F. Mao, W. Dong, et al. 2020. Prevalence of and factors associated with mental health problems and suicidality among senior high school students in rural China during the COVID-19 outbreak. *Asian J. Psychiatr.* 54: 102305.
59. Hou T., Y. Xie, X. Mao, et al. 2021. The mediating role of loneliness between social support and depressive symptoms among Chinese rural adolescents during COVID-19 outbreak: A comparative study between left-behind and non-left-behind students. *Front. Psychiatry* 12: 740094.
60. Humer E., R. Dale, P.L. Plener, et al. 2021. Assessment of mental health of high school students 1 semester after COVID-19-associated remote schooling measures were lifted in Austria in 2021. *JAMA Netw. Open* 4: e2135571.

61. Janousch C., F. Anyan, R. Morote, et al. 2022. Resilience patterns of Swiss adolescents before and during the COVID-19 pandemic: a latent transition analysis. *Int. J. Adolesc. Youth* 27: 294–314.
62. Jeelani A., S.A. Dkhar, R. Quansar, et al. 2022. Prevalence of depression and anxiety among school-going adolescents in Indian Kashmir valley during COVID-19 pandemic. *Middle East Curr. Psychiatr.* 29:.
63. Jenabi E., S. Bashirian, S. Khazaei, et al. 2021. Rates of anxiety, depression, and stress among high school students during the COVID-19 pandemic. *Current Psychiatry Research and Reviews* 17: 98–104.
64. Jin M., L. Ding, J. Fan, et al. 2022. Moderating role of resilience between depression and Stress Response of vocational middle school students during the COVID-19 pandemic. *Front. Psychiatry* 13: 904592.
65. Jung Y.H., B.N. Jang, M. Park, et al. 2022. Association between family financial decline due to COVID-19 and generalized anxiety disorder among Korean adolescents. *J. Affect. Disord.* 309: 411–417.
66. Kakaer A., S. Zhang, S. Huang, et al. 2021. Emotional and behavioral problems and determinants among primary and middle school students aged 6 to 17-year-old in Guangdong Province during the COVID-19 pandemic. *Chinese Journal of School Health* 42: 1129–1134.
67. Kaman A., C. Otto, A. Adedeji, et al. 2021. Belastungserleben und psychische Auffälligkeiten von Kindern und Jugendlichen in Hamburg während der COVID-19-Pandemie. *Nervenheilkunde* 40: 319–326.
68. Sama B.K., P. Kaur, P.S. Thind, et al. 2021. Implications of COVID-19-induced nationwide lockdown on children's behaviour in Punjab, India. *Child Care Health Dev.* 47: 128–135.
69. Kim H., M. Jhon, J.-W. Kim, et al. 2022. Factors associated with depression and anxiety in Korean adolescents during the COVID-19 pandemic. *Psychiatry Investig.* 19: 551–561.
70. Kim D.H., B. Kim, S.-Y. Jang, et al. 2022. Sleep and mental health among adolescents during the COVID-19 pandemic. *Psychiatry Investig.* 19: 637–645.
71. Koyuncu Z., Department of Child and Adolescent Psychiatry, Istanbul University-Cerrahpasa, Cerrahpasa Faculty of Medicine, Istanbul, Turkey, M.E. Gokler, et al. 2022. Relationship of sleep disturbances in children with depression / anxiety symptoms in children and their parents during the covid-19 pandemic. *Neuropsychiatr Invest* 60: 42–48.
72. Kutu-Pachecka M., Centre for Teacher Education, University of Wrocław, Wrocław, Poland, M. Kozłowska, et al. 2020. Anxiety, depression and health locus of control in secondary school students during the COVID-19 pandemic. *Psychiatr. Psychol. Klin.* 20: 219–233.
73. Lee H., Y. Noh, J.Y. Seo, et al. 2021. Impact of the COVID-19 pandemic on the mental health of adolescent students in Daegu, Korea. *J. Korean Med. Sci.* 36: e321.
74. Lee K.-S., H.K. Sung, S.H. Lee, et al. 2022. Factors related to anxiety and depression among adolescents during COVID-19: A web-based cross-sectional survey. *J. Korean Med. Sci.* 37: e199.
75. Lee J., Y.-H. Ko, S. Chi, et al. 2022. Impact of the COVID-19 pandemic on Korean adolescents' mental health and lifestyle factors. *J. Adolesc. Health* 71: 270–276.
76. Lee B. & J.S. Hong. 2022. Short- and long-term impacts of the COVID-19 pandemic on suicide-related mental health in Korean adolescents. *Int. J. Environ. Res. Public Health* 19: 11491.
77. Li S.W., Y. Wang, Y.Y. Yang, et al. 2020. Investigation on the influencing factors for anxiety related emotional disorders of children and adolescents with home quarantine during the prevalence of coronavirus disease 2019. *Chinese Journal of Child Health Care* 28: 407–410.
78. Li W., Y. Zhang, J. Wang, et al. 2021. Association of home quarantine and mental health among teenagers in Wuhan, China, during the COVID-19 pandemic. *JAMA Pediatr.* 175: 313–316.
79. Li Y., Y. Zhou, T. Ru, et al. 2021. How does the COVID-19 affect mental health and sleep among Chinese adolescents: a longitudinal follow-up study. *Sleep Med.* 85: 246–258.
80. Li M., L. Li, F. Wu, et al. 2021. Perceived family adaptability and cohesion and depressive symptoms: A comparison of adolescents and parents during COVID-19 pandemic. *J. Affect. Disord.* 287: 255–260.

81. Li S.H., J.R. Beames, J.M. Newby, et al. 2021. The impact of COVID-19 on the lives and mental health of Australian adolescents. *Eur. Child Adolesc. Psychiatry*.
82. Liang Z., C. Mazzechi & E. Delvecchio. 2021. The impact of parental stress on Italian adolescents' internalizing symptoms during the COVID-19 pandemic: A longitudinal study. *Int. J. Environ. Res. Public Health* 18: 8074.
83. Liao X.X. 2021. [The impact of the 2019 novel coronavirus infection on sleep in children aged 2-12]. Department of Clinical Paediatric Medicine, Chongqing Medical University (Masters in Clinical Medicine Thesis).
84. Liao X.X., L. Chen, T. Yang, et al. 2022. Impact of 2019 novel coronavirus epidemic on sleep of children aged 2-12 years old. *Chongqing Medicine* 51: 127-131.
85. Liu G., M. You & H. Lu. 2020. Impact of COVID-19 pandemic on the mental health of high school seniors in Guangxi. *Journal of Guangxi Medical University* 37: 1731-1734.
86. Liu Y., S. Yue, X. Hu, et al. 2021. Associations between feelings/behaviors during COVID-19 pandemic lockdown and depression/anxiety after lockdown in a sample of Chinese children and adolescents. *J. Affect. Disord.* 284: 98-103.
87. Liu S., X. Chen, Y. Li, et al. 2021. Investigation of depression and anxiety and their influencing factors among adolescents in Beijing during the coronavirus disease 2019 epidemic. *Journal of Capital Medical University* 42: 412-417.
88. Liu S., S. Zou, D. Zhang, et al. 2022. Problematic Internet use and academic engagement during the COVID-19 lockdown: The indirect effects of depression, anxiety, and insomnia in early, middle, and late adolescence. *J. Affect. Disord.* 309: 9-18.
89. Liu Y., J. Hu & J. Liu. 2022. Social support and depressive symptoms among adolescents during the COVID-19 pandemic: The mediating roles of loneliness and meaning in life. *Front. Public Health* 10: 916898.
90. Lu C., X. Chi, K. Liang, et al. 2020. Moving more and sitting less as healthy lifestyle behaviors are protective factors for insomnia, depression, and anxiety among adolescents during the COVID-19 pandemic. *Psychol. Res. Behav. Manag.* 13: 1223-1233.
91. Lu T., Y. Yu, Z. Zhao, et al. 2022. Mental health and related factors of adolescent students during Coronavirus disease 2019 (COVID-19) pandemic. *Psychiatry Investig.* 19: 16-28.
92. Luijten M.A.J., M.M. van Muilekom, L. Teela, et al. 2021. The impact of lockdown during the COVID-19 pandemic on mental and social health of children and adolescents. *Qual. Life Res.* 30: 2795-2804.
93. Luthar S.S., A.M. Ebbert & N.L. Kumar. 2021. Risk and resilience during COVID-19: A new study in the Zigler paradigm of developmental science. *Dev. Psychopathol.* 33: 565-580.
94. Ma J., J. Ding, J. Hu, et al. 2021. Children and adolescents' psychological well-being became worse in heavily hit Chinese provinces during the COVID-19 epidemic. *J. Psychiatr. Brain Sci.* 6:.
95. Ma Z., S. Idris, Y. Zhang, et al. 2021. The impact of COVID-19 pandemic outbreak on education and mental health of Chinese children aged 7-15 years: an online survey. *BMC Pediatr.* 21: 95.
96. Mactavish A., C. Mastronardi, R. Menna, et al. 2021. Children's mental health in Southwestern Ontario during summer 2020 of the COVID-19 pandemic. *J. Can. Acad. Child Adolesc. Psychiatry* 30: 177-190.
97. Magklara K., H. Lazaratou, A. Barbouni, et al. 2022. The impact of COVID-19 lockdown on children's and adolescents' mental health in Greece. *Child. Soc.*
98. Mansfield K.L., D. Newby, E. Sonesson, et al. 2021. COVID-19 partial school closures and mental health problems: A cross-sectional survey of 11,000 adolescents to determine those most at risk. *JCPP Adv* 1: e12021.
99. McArthur B.A., N. Racine, S. McDonald, et al. 2021. Child and family factors associated with child mental health and well-being during COVID-19. *Eur. Child Adolesc. Psychiatry*.
100. McGuire T.A., K.M. Biese, L. Petrovska, et al. 2021. Mental health, physical activity, and quality of life of US adolescent athletes during COVID-19-related school closures and sport cancellations: A study of 13 000 athletes. *J. Athl. Train.* 56: 11-19.

101. McGuine T.A., K.M. Biese, L. Petrovska, et al. 2021. Changes in the Health of Adolescent Athletes: A Comparison of Health Measures Collected Before and During the COVID-19 Pandemic. *J. Athl. Train.* 56: 836-844.
102. McGuine T., K. Biese, S. Hetzel, et al. 2022. A multi-year assessment of sport participation during the COVID-19 pandemic on the health of adolescent athletes. *J. Athl. Train.*
103. McGuine T.A., K. M Biese, S.J. Hetzel, et al. 2022. High school sports during the COVID-19 pandemic: The effect of sport participation on the health of adolescents. *J. Athl. Train.* 57: 51-58.
104. McGuine T., K. Biese, A. Schwarz, et al. 2022. The Impact of sport participation on the Health of Adolescents During the COVID-19 pandemic. *Orthop. J. Sports Med.* 10: 232596712150042.
105. Min S.-K., W.-H. Son, B.-H. Choi, et al. 2021. Psychophysical condition of adolescents in coronavirus disease 2019. *J. Exerc. Rehabil.* 17: 112-119.
106. Mo D., J. Yan, X. Li, et al. 2020. Prevalence rate and related influencing factors of anxiety disorder in children and adolescents during the outbreak of COVID-19. *Sichuan Mental Health* 33: 202-206.
107. Mohler-Kuo M., S. Dzemaili, S. Foster, et al. 2021. Stress and Mental Health among children/adolescents, their parents, and young adults during the first COVID-19 lockdown in Switzerland. *Int. J. Environ. Res. Public Health* 18.
108. Moitra P. & J. Madan. 2022. Impact of screen time during COVID-19 on eating habits, physical activity, sleep, and depression symptoms: A cross-sectional study in Indian adolescents. *PLoS One* 17: e0264951.
109. Molu B., M. Taşdelen Baş & F. Özpulat. 2022. The effect of digital screen exposure and temperament on sleep problems in children during the COVID-19 pandemic: Rural area in turkey. *J. Turk. Sleep Med.* 9: 157-164.
110. Monnier M., F. Moulin, X. Thierry, et al. 2021. Children's mental and behavioral health, schooling, and socioeconomic characteristics during school closure in France due to COVID-19: the SAPRIS project. *Sci. Rep.* 11: 22373.
111. Murata S., T. Rezeppa, B. Thoma, et al. 2021. The psychiatric sequelae of the COVID-19 pandemic in adolescents, adults, and health care workers. *Depress. Anxiety* 38: 233-246.
112. Nakachi K., K. Kawabe, R. Hosokawa, et al. 2021. Differences in Psychological and Behavioral Changes between Children following School Closure due to COVID-19. *Psychiatry J.* 2021: 5567732.
113. O'Kane S.M., I.M. Lahart, A.M. Gallagher, et al. 2021. Changes in physical activity, sleep, mental health, and social media use during COVID-19 lockdown among adolescent girls: A mixed-methods study. *J. Phys. Act. Health* 18: 677-685.
114. Oliva S., G. Russo, R. Gili, et al. 2021. Risks and protective factors associated with mental health symptoms during COVID-19 home confinement in Italian children and adolescents: The #understandingkids study. *Front. Pediatr.* 9: 664702.
115. Orgilés M., J.P. Espada, E. Delvecchio, et al. 2021. Anxiety and depressive symptoms in children and adolescents during COVID-19 pandemic: A transcultural approach. *Psicothema* 33: 125-130.
116. Ozbaran B., F. Turer, H.Y. Yilancioglu, et al. 2022. COVID-19-related stigma and mental health of children and adolescents during pandemic. *Clin. Child Psychol. Psychiatry* 27: 185-200.
117. Paiva E.D., L.R. da Silva, M.E.D. Machado, et al. 2021. Child behavior during the social distancing in the COVID-19 pandemic. *Rev. Bras. Enferm.* 74Suppl 1: e20200762.
118. Peng X., S. Liang, L. Liu, et al. 2022. Prevalence and associated factors of depression, anxiety and suicidality among Chinese high school E-learning students during the COVID-19 lockdown. *Curr. Psychol.* 1-12.
119. Pieh C., P.L. Plener, T. Probst, et al. 2021. Assessment of mental health of high school students during social distancing and remote schooling during the COVID-19 pandemic in Austria. *JAMA Netw. Open* 4: e2114866.
120. Pisano S., G. Catone, A. Gritti, et al. 2021. Emotional symptoms and their related factors in adolescents during the acute phase of Covid-19 outbreak in South Italy. *Ital. J. Pediatr.* 47: 86.

121. Pizarro-Ruiz J.P. & N. Ordóñez-Cambolor. 2021. Effects of Covid-19 confinement on the mental health of children and adolescents in Spain. *Sci. Rep.* 11: 11713.
122. Puteikis K., A. Mameniškytė & R. Mameniškienė. 2022. Sleep quality, mental health and learning among high school students after reopening schools during the COVID-19 pandemic: Results of a cross-sectional online survey. *Int. J. Environ. Res. Public Health* 19:.
123. Qi H., R. Liu, X. Chen, et al. 2020. Prevalence of anxiety and associated factors for Chinese adolescents during the COVID-19 outbreak. *Psychiatry Clin. Neurosci.* 74: 555-557.
124. Qi M., S.-J. Zhou, Z.-C. Guo, et al. 2020. The effect of social support on mental health in Chinese adolescents during the outbreak of COVID-19. *J. Adolesc. Health* 67: 514-518.
125. Qi H., R. Liu, Y. Feng, et al. 2021. Prevalence of depression and its associated factors among adolescents in China during the early stage of the COVID-19 outbreak. *PeerJ* 9: e12223.
126. Ravens-Sieberer U., A. Kaman, M. Erhart, et al. 2021. Quality of life and mental health in children and adolescents during the first year of the COVID-19 pandemic: results of a two-wave nationwide population-based study. *Eur. Child Adolesc. Psychiatry.*
127. Ren Z., Y. Xin, Z. Wang, et al. 2021. What factors are most closely associated with mood disorders in adolescents during the COVID-19 pandemic? A cross-sectional study based on 1,771 adolescents in Shandong province, China. *Front. Psychiatry* 12: 728278.
128. Leon Rojas D., F. Castorena Torres, B.M. Garza-Ornelas, et al. 2022. Parents and school-aged children's mental well-being after prolonged school closures and confinement during the COVID-19 pandemic in Mexico: a cross-sectional online survey study. *BMJ Paediatr. Open* 6:.
129. Sarvari S., M. Rahimzadeh, S.M. Saei, et al. 2022. Do the adolescents' physical activity and screen time during the COVID-19 quarantine correlate to their upper extremity abnormalities and anxiety? *Int. J. Pediatr.* 10: 15567-15576.
130. Selçuk E.B., A.Ç. Demir, L.G. Erbay, et al. 2021. Anxiety, depression and post-traumatic stress disorder symptoms in adolescents during the COVID-19 outbreak and associated factors. *Int. J. Clin. Pract.* 75: e14880.
131. She R., K. Wong, J. Lin, et al. 2021. How COVID-19 stress related to schooling and online learning affects adolescent depression and Internet gaming disorder: Testing Conservation of Resources theory with sex difference. *J. Behav. Addict.* 10: 953-966.
132. Siachpazidou D.I., O.S. Kotsiou, G. Chatziparasidis, et al. 2021. Action and reaction of pre-primary and primary school-age children to restrictions during COVID-19 pandemic in Greece. *J. Pers. Med.* 11: 451.
133. Sicouri G., S. March, E. Pellicano, et al. 2022. Mental health symptoms in children and adolescents during COVID-19 in Australia. *Aust. N. Z. J. Psychiatry* 48674221090174.
134. Sifat R.I., M.M. Ruponty, M.K. Rahim Shuvo, et al. 2022. Impact of COVID-19 pandemic on the mental health of school-going adolescents: insights from Dhaka city, Bangladesh. *Heliyon* 8: e09223.
135. da Silva B.B.L., M.C.F. de Melo & L.M. Studart-Pereira. 2022. Adolescents' sleep quality during the COVID-19 pandemic. *Sleep Sci.* 15: 257-263.
136. Song M. 2020. Investigation and suggestions on the physical and mental health of senior two students in our school during the period of epidemic prevention and control: A case study on grade 2021 students of Zunyi No.4 High School. *The Science Education Article Collects* 27: 168-170.
137. Spiratos K.N. 2021. PROBLEMATIC SMARTPHONE USE AMONG HIGH SCHOOL STUDENTS AND ITS RELATIONSHIPS WITH DEPRESSION, STRESS, SELF-ESTEEM, GRIT AND ACADEMIC PERFORMANCE. .
138. Stewart T.M., D. Fry, L. McAra, et al. 2022. Rates, perceptions and predictors of depression, anxiety and Post Traumatic Stress Disorder (PTSD)-like symptoms about Covid-19 in adolescents. *PLoS One* 17: e0266818.
139. Su C.L. & Y.G. Sun. 2020. [Psychological status and coping strategies of primary school students during the novel coronavirus epidemic]. *Mental Health Education in Primary and Secondary School* 452: 24-28.



140. Tamarit A., U. de la Barrera, E. Mónaco, et al. 2020. Psychological impact of COVID-19 pandemic in Spanish adolescents: risk and protective factors of emotional symptoms. *Rev. psicol. clín. con niños adolesc.* 7: 73-80.
141. Tang S. & H.W. Pang. 2020. [Anxiety and depression among children and adolescents during the COVID-19 pandemic]. *Mental Health Education in Primary and Secondary School* 438: 15-18.
142. Tang L. & B. Ying. 2020. [Middle school students during the novel coronavirus pneumonia epidemic: Investigation and Analysis of Mental Health Status and Influencing Factors]. *Mental Health Education in Primary and Secondary School* 429: 57-61.
143. Tang S., M. Xiang, T. Cheung, et al. 2021. Mental health and its correlates among children and adolescents during COVID-19 school closure: The importance of parent-child discussion. *J. Affect. Disord.* 279: 353-360.
144. Teker A.G. & N. Yakşi. 2021. Factors affecting sleep quality in high school students and its relationship with nomophobia. *J. Turk. Sleep Med.* 8: 216-221.
145. Ustuner Top F. & H.H. Cam. 2022. Sleep disturbances in school-aged children 6-12 years during the COVID-19 pandemic in Turkey. *J. Pediatr. Nurs.* 63: 125-130.
146. Türk F., A. Kul & E. Kiliç. 2021. Depression-anxiety and coping strategies of adolescents during the Covid-19 pandemic. *Turk. J. Educ.* 58-75.
147. Ursache A., R.G. Barajas-Gonzalez, S. Adhikari, et al. 2022. A quasi-experimental study of parent and child well-being in families of color in the context of COVID-19 related school closure. *SSM Popul. Health* 17: 101053.
148. Vaidya R., S.K. Kaza, P. Gupta, et al. 2022. Depression, Anxiety, and Stress among Indian Youth during the COVID-19 Lockdown - A Cross-Sectional Survey. *Journal of Mental Health and Human Behaviour* 26: 153-160.
149. Valero-Moreno S. 2022. Impacto emocional y resiliencia en adolescentes de España y Ecuador durante la COVID-19: estudio transcultural. *Rev. psicol. clín. con niños adolesc.* 9: 29-36.
150. Villanti A.C., S.E. LePine, C. Peasley-Miklus, et al. 2022. COVID-related distress, mental health, and substance use in adolescents and young adults. *Child Adolesc. Ment. Health* 27: 138-145.
151. Vivechana S. & P. Bimala. 2021. Daily Activities and Anxiety among School Going Children during COVID 19 Pandemic and School Closure. *International Journal of Caring Sciences* 14: 197-204.
152. Wang L.L. & D.J. Sun. 2020. [Investigation and research on anxiety status of middle school students in Beijing under the background of epidemic]. *Fundamental Education Forum* 79-80.
153. Wang N.X. & P.F. Xu. 2020. [A survey of adolescents' psychological stress and coping styles during the COVID-19 epidemic]. *Journal of Dali University* 5: 123-128.
154. Wang Y., Y.Y. Yang, S.W. Li, et al. 2020. Investigation on the status and influencing factors for depression symptom of children and adolescents with home quarantine during the prevalence of novel coronavirus pneumonia. *Chinese Journal of Child Health Care* 28: 277-280.
155. Wang P.P., C. Zhang, Q.L. Zheng, et al. 2020. [Association study between screen exposure and sleep in home-based junior high school students during the novel coronavirus pneumonia (COVID-19) outbreak: a cross-sectional survey]. In *Compilation of the 12th National Academic Annual Conference, 2020* 153-154. China Sleep Research Society.
156. Wang P.Y., W. Li, Y.B. Hu, et al. 2021. Investigation on sleep problems and related factors in preschool children during home quarantine. *Chinese Journal of Child Health Care* 29: 479-483.
157. Wang Y.L., Y. Luo, Y. Zhu, et al. 2021. Psychological and behavioral problems of school-age children in Guizhou during COVID-19 pandemic. *Chinese Journal of Preventive Medicine* 22: 53-58.
158. Wang W., Y. Guo, X. Du, et al. 2021. Associations between poor sleep quality, anxiety symptoms, and depressive symptoms among Chinese adolescents before and during COVID-19: A longitudinal study. *Front. Psychiatry* 12: 786640.
159. Wang L., Y. Yeerjiang, H.F. Gao, et al. 2022. Self-reported anxiety level and related factors in senior high school students in China during the outbreak of coronavirus disease 2019. *J. Affect. Disord.* 301: 260-267.

160. Wearick-Silva L.E., S.A. Richter, T.W. Viola, et al. 2022. Sleep quality among parents and their children during COVID-19 pandemic. *J. Pediatr. (Rio J.)* 98: 248–255.
161. Wen F., Y. Meng, K. Liu, et al. 2022. Depression among schoolchildren and adolescents aged 9-17 years during the outbreak of COVID-19 in Beijing: a cross-sectional online survey. *Psychol. Health Med.* 1–13.
162. L. Wesley K., E.H. Cooper, J.T. Brinton, et al. 2022. A national survey of U.S. adolescent sleep duration, timing, and social jetlag during the COVID-19 pandemic. *Behav. Sleep Med.* 1–13.
163. Windiani I.G.A.T., N.M.R. Noviyani, I.G.A.N.S. Adnyana, et al. 2021. Prevalence of sleep disorders in adolescents and its relation with screen time during the COVID-19 pandemic era. *Open Access Maced. J. Med. Sci.* 9: 297–300.
164. Xie X., Q. Xue, Y. Zhou, et al. 2020. Mental health status among children in home confinement during the Coronavirus disease 2019 outbreak in Hubei province, China. *JAMA Pediatr.* 174: 898–900.
165. Xie X., Q. Liu, K. Zhu, et al. 2022. Psychological symptom progression in school-aged children after COVID-19 home confinement: A longitudinal study. *Front. Psychiatry* 13: 809107.
166. Xu Q., Z. Mao, D. Wei, et al. 2021. Prevalence and risk factors for anxiety symptoms during the outbreak of COVID-19: A large survey among 373216 junior and senior high school students in China. *J. Affect. Disord.* 288: 17–22.
167. Xu Q., Z. Mao, D. Wei, et al. 2022. Association between mask wearing and anxiety symptoms during the outbreak of COVID 19: A large survey among 386,432 junior and senior high school students in China. *J. Psychosom. Res.* 153: 110709.
168. Xue Q., X. Xie, Q. Liu, et al. 2021. Knowledge, attitudes, and practices towards COVID-19 among primary school students in Hubei Province, China. *Child. Youth Serv. Rev.* 120: 105735.
169. Yakşi N., M. Eroğlu & M. Özdemir. 2021. Covid-19: Lise Öğrencilerinde Depresyon ve Anksiyetenin Prediktörleri. *Cyprus Turkish Journal of Psychiatry & Psychology* 3: 192–202.
170. Yin M.Y., J.H. Li, S.H. Huang, et al. 2022. [Analysis of mental health and influencing factors of middle school students in some areas of Guangxi]. *Health Vocational Education* 40: 146–149.
171. Yu Q.X., Y.M. Zeng & W.J. Lu. 2020. [Investigation and analysis on the mental health status of middle school students during the novel coronavirus pneumonia epidemic]. *Jiangsu Education* 44–47.
172. Yue J., X. Zang, Y. Le, et al. 2020. Anxiety, depression and PTSD among children and their parent during 2019 novel coronavirus disease (COVID-19) outbreak in China. *Curr. Psychol.* 1–8.
173. Zainel A.A., H. Qotba, A. Al-Maadeed, et al. 2021. Psychological and coping strategies related to home isolation and social distancing in children and adolescents during the COVID-19 pandemic: Cross-sectional study. *JMIR Form. Res.* 5: e24760.
174. Zhai X., J. Zeng, E.S. Eshak, et al. 2021. The influencing factors of sleep quality among Chinese junior and senior high school adolescents during the COVID-19 pandemic. *J. Trop. Pediatr.* 67:.
175. Zhan N., Y. Zhang, D. Xie, et al. 2022. The associations of parental COVID-19 related worries, lifestyles, and insomnia with child insomnia during the COVID-19 outbreak. *J. Sleep Res.* e13590.
176. Zhang L., D. Zhang, J. Fang, et al. 2020. Assessment of mental health of Chinese primary school students before and after school closing and opening during the COVID-19 pandemic. *JAMA Netw. Open* 3: e2021482.
177. Zhang X.M., T. Yang, Y.Q. Hu, et al. 2020. [Investigation and analysis on the psychological status of junior high school students in Jiangyou area during the outbreak of novel coronavirus pneumonia]. *Baojian Wenhui* 155–157.
178. Zhang Z., A. Zhai, M. Yang, et al. 2020. Prevalence of depression and anxiety symptoms of high school students in Shandong Province during the COVID-19 epidemic. *Front. Psychiatry* 11: 570096.
179. Zhang C., M. Ye, Y. Fu, et al. 2020. The psychological Impact of the COVID-19 pandemic on teenagers in China. *J. Adolesc. Health* 67: 747–755.

- 180.Zhang X., H. Yang, J. Zhang, et al. 2021. Prevalence of and risk factors for depressive and anxiety symptoms in a large sample of Chinese adolescents in the post-COVID-19 era. *Child Adolesc. Psychiatry Ment. Health* 15: 80.
- 181.Zhang Y., N. Zhan, J. Zou, et al. 2022. The transmission of psychological distress and lifestyles from parents to children during COVID-19. *J. Affect. Disord.* 303: 74-81.
- 182.Zhao J., J. Xu, Y. He, et al. 2022. Children and adolescents' sleep patterns and their associations with mental health during the COVID-19 pandemic in Shanghai, China. *J. Affect. Disord.* 301: 337-344.
- 183.Zhen R. & X. Zhou. 2022. Latent patterns of posttraumatic stress symptoms, depression, and posttraumatic growth among adolescents during the COVID-19 pandemic. *J. Trauma. Stress* 35: 197-209.
- 184.Zhong H.P., C.M. Zhou & C.C. Wang. 2021. Investigation of anxiety symptom in children and adolescents during COVID-19 epidemic. *China Standardization* 591: 128-131.
- 185.Zhou S.-J., L.-G. Zhang, L.-L. Wang, et al. 2020. Prevalence and socio-demographic correlates of psychological health problems in Chinese adolescents during the outbreak of COVID-19. *Eur. Child Adolesc. Psychiatry* 29: 749-758.
- 186.Zhou J., X. Yuan, H. Qi, et al. 2020. Prevalence of depression and its correlative factors among female adolescents in China during the coronavirus disease 2019 outbreak. *Global. Health* 16: 69.
- 187.Zhou S.-J., L.-L. Wang, R. Yang, et al. 2020. Sleep problems among Chinese adolescents and young adults during the coronavirus-2019 pandemic. *Sleep Med.* 74: 39-47.
- 188.Zhou R. & B. Han. 2020. [Investigation on the psychological status of junior high school students after returning to school and counseling countermeasures]. *Mental Health Education in Primary and Secondary School* 442: 72-75.
- 189.Zhou C., R. Li, M. Yang, et al. 2021. Psychological status of high school students 1 year after the COVID-19 emergency. *Front. Psychiatry* 12: 729930.
- 190.Zhu K.H., Y. Zhou, X.Y. Xie, et al. 2020. Anxiety symptom and its associates among primary school students in Hubei province during novel coronavirus disease 2019 epidemic. *Chinese Journal of Public Health* 36: 673-676.
- 191.Zhu J., J. Li, S. Yue, et al. 2021. Correlated factors of depression in children and adolescents during the COVID-19 pandemic. *Journal of Jining Medical College* 44: 398-402.
