# Supplementary material
Source: PubMed Central journal article supplement (PMC9880764)
Supplement: NYAS-9999-0-s005.pdf [file NYAS-9999-0-s005.pdf]

# **Prevalence of mental health symptoms in children and adolescents during the COVID-19 pandemic: A meta-analysis**

**Supplementary Table S10:** Risk of bias ratings

**Table S10:** Risk of bias ratings

| Study                          | Domain A | Domain B | Domain C | Domain D | Domain E | Domain F | Domain G | Domain H | Domain I | Domain J | Overall Rating |
|--------------------------------|----------|----------|----------|----------|----------|----------|----------|----------|----------|----------|----------------|
| Adams et al., 2022             | High     | High     | High     | High     | Low      | Low      | Low      | Low      | Low      | Low      | Moderate       |
| Adegboye et al., 2022          | High     | High     | High     | High     | High     | Low      | Low      | Low      | Low      | Low      | High           |
| AlAzzam et al., 2021           | Low      | High     | High     | High     | Low      | Low      | Low      | Low      | Low      | Low      | Moderate       |
| Albrecht et al., 2022          | High     | Low      | High     | Low      | Moderate       |
| Alnamakani et al., 2022        | High     | Low      | High     | Low      | High     | Low      | Low      | Low      | Low      | Low      | Moderate       |
| Alqassim et al., 2022          | High     | Low      | High     | Low      | Moderate       |
| Arazi et al., 2022             | High     | Low      | High     | Low      | High     | High     | High     | Low      | High     | Low      | High           |
| Argiansya et al., 2021         | High     | Low      | Low      | Low      | Low      | High     | Low      | Low      | Low      | Low      | Moderate       |
| Asanov et al., 2021            | High     | Low      | Low      | High     | Low      | Low      | Low      | Low      | Low      | Low      | Moderate       |
| Avila et al., 2020             | High     | Low      | High     | High     | Low      | Low      | Low      | Low      | Low      | Low      | Moderate       |
| Bani-Issa et al., 2022         | Low            |
| Baptista et al., 2020          | High     | Low      | High     | Low      | High     | High     | Low      | Low      | Low      | Low      | Moderate       |
| Bazett-Jones et al., 2021      | Low      | High     | High     | High     | Low      | High     | High     | Low      | High     | Low      | High           |
| Becker et al., 2021            | Low      | Low      | Low      | High     | High     | Low      | Low      | Low      | Low      | Low      | Moderate       |
| Berki et al., 2021             | High     | Low      | High     | Low      | Moderate       |
| Bhatta et al., 2021            | High     | High     | High     | High     | Low      | Low      | Low      | Low      | Low      | Low      | Moderate       |
| Black et al., 2021             | High     | Low      | High     | Low      | Moderate       |
| Büyük et al., 2022             | High     | High     | Low      | High     | Low      | Low      | Low      | Low      | Low      | Low      | Moderate       |
| Cao et al., 2021               | High     | Low            |
| Cao et al., 2022               | High     | Low            |
| Castillo-Martínez et al., 2022 | High     | Low      | High     | Low      | Low      | High     | Low      | Low      | Low      | Low      | Moderate       |
| Cheah et al., 2020             | High     | High     | High     | High     | Low      | Low      | Low      | Low      | Low      | Low      | Moderate       |
| Chen et al., 2020a             | High     | Low      | High     | Low      | Moderate       |
| Chen et al., 2020b             | High     | Low      | High     | Low      | Moderate       |
| Chen et al., 2020c             | High     | Low      | High     | Low      | Low      | High     | High     | Low      | Low      | Low      | Moderate       |
| Chen et al., 2021              | Low      | Low      | High     | Low            |
| Chi et al., 2021               | High     | Low      | Low      | High     | Low      | Low      | Low      | Low      | Low      | Low      | Moderate       |
| Chi et al., 2022               | High     | Low      | Low      | High     | Low      | Low      | Low      | Low      | Low      | Low      | Moderate       |
| Choukas-Bradley et al., 2022   | High     | High     | High     | High     | Low      | Low      | Low      | Low      | Low      | Low      | Moderate       |
| Crescentini et al., 2020       | High     | Low      | High     | Low      | High     | Low      | Low      | Low      | Low      | Low      | Moderate       |
| Curatola et al., 2022          | High     | High     | High     | Low      | Moderate       |
| Dai et al., 2020               | High     | High     | High     | High     | Low      | Low      | Low      | Low      | Low      | Low      | Moderate       |
| Dale et al., 2022              | High     | Low      | High     | High     | Low      | Low      | Low      | Low      | Low      | Low      | Moderate       |
| Deb et al., 2022               | High     | High     | High     | High     | Low      | Low      | Low      | Low      | Low      | Low      | Moderate       |
| Denerel et al., 2021           | Low      | Low      | Low      | High     | Low            |
| Ding et al., 2022              | High     | Low            |
| Dong et al., 2020              | High     | Low      | High     | Low      | Moderate       |
| Dönmez et al., 2021            | Low      | Low      | Low      | High     | High     | Low      | Low      | Low      | Low      | Low      | Moderate       |
| Duan et al., 2020              | Low      | Low      | High     | High     | Low      | Low      | Low      | Low      | Low      | Low      | Moderate       |
| El Refay et al., 2021          | High     | Low      | High     | High     | High     | High     | High     | Low      | Low      | Low      | High           |
| Fidancı et al., 2021           | High     | High     | Low      | High     | High     | Low      | Low      | Low      | Low      | Low      | Moderate       |
| Fischer et al., 2022           | Low      | Low      | High     | High     | Low      | High     | Low      | Low      | Low      | Low      | Moderate       |
| Fogarty et al., 2022           | High     | High     | High     | Low      | Moderate       |

|                                    |      |      |      |      |      |      |      |     |      |     |          |
|------------------------------------|------|------|------|------|------|------|------|-----|------|-----|----------|
| Forte et al., 2021                 | Low  | Low  | Low  | High | Low  | High | High | Low | High | Low | Moderate |
| Ghorbani et al., 2021              | High | High | High | Low  | Low  | High | Low  | Low | Low  | Low | Moderate |
| Giannini et al., 2021              | High | High | High | Low  | High | High | High | Low | High | Low | High     |
| Giannopoulou et al., 2021          | High | High | High | Low  | Low  | Low  | Low  | Low | Low  | Low | Moderate |
| Gladstone et al., 2021             | High | Low  | Low  | High | Low  | High | Low  | Low | Low  | Low | Moderate |
| Glynn et al., 2021                 | High | Low  | High | Low  | High | Low  | Low  | Low | Low  | Low | Moderate |
| Guo et al., 2020                   | High | Low  | High | Low  | Low  | Low  | Low  | Low | Low  | Low | Moderate |
| Håkansson et al., 2022             | High | High | High | Low  | Low  | Low  | Low  | Low | Low  | Low | Moderate |
| Hamid et al., 2022                 | High | Low  | Low  | High | Low  | Low  | Low  | Low | Low  | Low | Moderate |
| Han et al., 2021                   | Low  | Low  | Low  | Low  | Low  | High | High | Low | Low  | Low | Moderate |
| He et al., 2020                    | High | Low  | High | Low  | Low  | High | High | Low | Low  | Low | Moderate |
| He et al., 2021                    | High | Low  | Low  | High | Low  | Low  | Low  | Low | Low  | Low | Moderate |
| Hermsillo-de-la-Torre et al., 2021 | High | Low  | High | High | Low  | Low  | Low  | Low | Low  | Low | Moderate |
| Hertz et al., 2022                 | Low  | Low  | Low  | Low  | Low  | High | Low  | Low | Low  | Low | Moderate |
| Hou et al., 2020                   | High | High | Low  | High | Low  | Low  | Low  | Low | Low  | Low | Moderate |
| Hou et al., 2021                   | High | Low  | Low  | Low  | Low  | Low  | Low  | Low | Low  | Low | Low      |
| Humer et al., 2021                 | Low  | High | Low  | High | Low  | Low  | Low  | Low | Low  | Low | Moderate |
| Janousch et al., 2022              | High | Low  | High | High | Low  | High | Low  | Low | Low  | Low | Moderate |
| Jeelani et al., 2022               | High | Low  | Low  | Low  | Low  | Low  | Low  | Low | Low  | Low | Low      |
| Jenabi et al., 2021                | High | Low  | Low  | Low  | Low  | Low  | Low  | Low | Low  | Low | Low      |
| Jin et al., 2022                   | High | High | Low  | Low  | Low  | Low  | Low  | Low | Low  | Low | Moderate |
| Jung et al., 2022                  | Low  | Low | Low  | Low | Low      |
| Kakaer et al., 2021                | High | Low  | High | Low  | High | High | Low  | Low | Low  | Low | Moderate |
| Kaman et al., 2021                 | High | Low  | Low  | High | Low  | High | Low  | Low | Low  | Low | Moderate |
| Kaur Sama et al., 2020             | High | Low  | High | Low  | High | High | High | Low | High | Low | High     |
| Kim et al., 2022a                  | High | Low  | High | Low  | Low  | Low  | Low  | Low | Low  | Low | Moderate |
| Kim et al., 2022b                  | Low  | Low | Low  | Low | Low      |
| Koyuncu et al., 2022               | High | Low  | High | High | High | Low  | Low  | Low | Low  | Low | Moderate |
| Kuty-Pachecka et al., 2020         | High | High | High | Low  | Low  | Low  | Low  | Low | Low  | Low | Moderate |
| Lee et al., 2021                   | High | Low  | Low  | High | Low  | Low  | Low  | Low | Low  | Low | Moderate |
| Lee et al., 2022a                  | Low  | Low  | Low  | High | Low  | Low  | Low  | Low | Low  | Low | Low      |
| Lee et al., 2022b                  | Low  | Low | Low  | Low | Low      |
| Lee et al., 2022c                  | Low  | Low | Low  | Low | Low      |
| Li et al., 2020                    | High | Low  | High | Low  | Low  | Low  | Low  | Low | Low  | Low | Moderate |
| Li et al., 2021a                   | High | Low  | Low  | Low  | Low  | Low  | Low  | Low | Low  | Low | Low      |
| Li et al., 2021b                   | High | Low  | High | High | Low  | High | High | Low | Low  | Low | High     |
| Li et al., 2021c                   | High | Low  | High | Low  | Low  | High | Low  | Low | Low  | Low | Moderate |
| Li et al., 2021d                   | High | Low  | High | High | Low  | Low  | Low  | Low | Low  | Low | Moderate |
| Liang et al., 2021                 | High | Low  | High | Low  | High | Low  | Low  | Low | Low  | Low | Moderate |
| Liao & Li, 2021                    | High | High | High | Low  | Low  | Low  | Low  | Low | Low  | Low | Moderate |
| Liao et al., 2022                  | High | Low  | High | Low  | High | Low  | Low  | Low | Low  | Low | Moderate |
| Liu et al., 2020                   | High | Low  | High | Low  | Low  | Low  | Low  | Low | Low  | Low | Moderate |
| Liu et al., 2021a                  | High | Low  | Low  | High | Low  | Low  | Low  | Low | Low  | Low | Moderate |
| Liu et al., 2021b                  | High | Low  | High | High | Low  | Low  | Low  | Low | Low  | Low | Moderate |
| Liu et al., 2022a                  | Low  | Low  | Low  | High | Low  | Low  | Low  | Low | Low  | Low | Moderate |
| Liu et al., 2022b                  | High | Low  | High | Low  | Low  | Low  | Low  | Low | Low  | Low | Moderate |

|                              |      |      |      |      |      |      |      |     |      |     |          |
|------------------------------|------|------|------|------|------|------|------|-----|------|-----|----------|
| Lu et al., 2020              | High | Low  | Low  | Low  | Low  | Low  | Low  | Low | Low  | Low | Low      |
| Lu et al., 2022              | High | Low  | High | High | Low  | Low  | Low  | Low | Low  | Low | Moderate |
| Luijten et al., 2021         | Low  | Low  | Low  | High | Low  | Low  | Low  | Low | Low  | Low | Low      |
| Luthar et al., 2020          | High | High | High | Low  | Low  | Low  | Low  | Low | Low  | Low | Moderate |
| Ma et al., 2021a             | High | Low  | High | Low  | Low  | High | High | Low | High | Low | High     |
| Ma et al., 2021b             | High | Low  | High | Low  | High | Low  | Low  | Low | Low  | Low | Moderate |
| Mactavish et al., 2021       | High | Low  | High | High | Low  | High | Low  | Low | Low  | Low | Moderate |
| Magklara et al., 2022        | High | Low  | High | High | High | High | High | Low | High | Low | High     |
| Mansfield et al., 2021       | Low  | Low  | Low  | High | Low  | Low  | Low  | Low | Low  | Low | Low      |
| McArthur et al., 2021        | High | High | High | Low  | Low  | Low  | Low  | Low | Low  | Low | Moderate |
| McGuine et al., 2021a        | High | High | High | High | Low  | Low  | Low  | Low | Low  | Low | Moderate |
| McGuine et al., 2021b        | High | High | High | High | Low  | Low  | Low  | Low | Low  | Low | Moderate |
| McGuine et al., 2022a        | High | High | High | High | Low  | Low  | Low  | Low | Low  | Low | Moderate |
| McGuine et al., 2022b        | High | High | High | High | Low  | Low  | Low  | Low | Low  | Low | Moderate |
| McGuine et al., 2022c        | Low  | High | High | High | Low  | Low  | Low  | Low | Low  | Low | Moderate |
| Min et al., 2021             | High | Low  | High | Low  | Low  | Low  | Low  | Low | Low  | Low | Moderate |
| Mo et al., 2020              | High | Low  | High | Low  | Low  | Low  | Low  | Low | Low  | Low | Moderate |
| Mohler-Kuo et al., 2021      | Low  | Low  | High | High | Low  | Low  | Low  | Low | Low  | Low | Moderate |
| Moitra et al., 2022          | High | Low  | High | High | Low  | Low  | Low  | Low | Low  | Low | Moderate |
| Molu et al., 2022            | High | Low  | Low  | High | High | Low  | Low  | Low | Low  | Low | Moderate |
| Monnier et al., 2021         | Low  | Low  | High | High | High | High | High | Low | Low  | Low | High     |
| Murata et al., 2020          | Low  | Low  | High | High | Low  | High | Low  | Low | Low  | Low | Moderate |
| Nakachi et al., 2021         | High | Low  | High | High | High | High | High | Low | High | Low | High     |
| O'Kane et al., 2021          | High | Low  | High | High | Low  | Low  | Low  | Low | Low  | Low | Moderate |
| Oliva et al., 2021           | Low  | Low  | High | High | Low  | High | Low  | Low | Low  | Low | Moderate |
| Orgilés et al., 2020         | Low  | Low  | High | High | High | Low  | Low  | Low | Low  | Low | Moderate |
| Ozbaran et al., 2022         | High | High | High | High | Low  | Low  | Low  | Low | Low  | Low | Moderate |
| Paiva et al., 2021           | High | Low  | High | High | High | High | High | Low | High | Low | High     |
| Peng et al., 2022            | High | Low  | High | High | Low  | Low  | Low  | Low | Low  | Low | Moderate |
| Pieh et al., 2021            | Low  | Low  | Low  | High | Low  | Low  | Low  | Low | Low  | Low | Low      |
| Pisano et al., 2021          | High | High | High | Low  | Low  | Low  | Low  | Low | Low  | Low | Moderate |
| Pizarro-Ruiz et al., 2021    | Low  | Low  | Low  | High | Low  | High | Low  | Low | Low  | Low | Moderate |
| Puteikis et al., 2022        | High | Low  | High | Low  | Low  | Low  | Low  | Low | Low  | Low | Moderate |
| Qi et al., 2020a             | Low  | Low  | High | Low  | Low  | Low  | Low  | Low | Low  | Low | Low      |
| Qi et al., 2020b             | High | Low  | Low  | Low  | Low  | Low  | Low  | Low | Low  | Low | Low      |
| Qi et al., 2021              | Low  | Low  | High | Low  | Low  | Low  | Low  | Low | Low  | Low | Low      |
| Ravens-Sieberer et al., 2021 | Low  | Low  | Low  | High | Low  | Low  | Low  | Low | Low  | Low | Low      |
| Ren et al., 2021             | High | Low  | High | Low  | Low  | Low  | Low  | Low | Low  | Low | Moderate |
| Rojas et al., 2022           | High | Low  | High | High | High | Low  | Low  | Low | Low  | Low | Moderate |
| Sarvari et al., 2022         | High | High | High | High | Low  | High | Low  | Low | Low  | Low | High     |
| Selçuk et al., 2021          | High | Low  | High | High | Low  | Low  | Low  | Low | Low  | Low | Moderate |
| She et al., 2021             | Low  | Low | Low  | Low | Low      |
| Siachpazidou et al., 2021    | Low  | Low  | High | Low  | High | High | High | Low | High | Low | High     |
| Sicouri et al., 2022         | High | Low  | High | High | High | High | High | Low | Low  | Low | High     |
| Sifat et al., 2022           | High | Low  | High | High | High | High | High | Low | High | Low | High     |
| Silva et al., 2022           | High | Low  | High | Low  | Low  | Low  | Low  | Low | Low  | Low | Moderate |

|                            |      |      |      |      |      |      |      |     |      |     |          |
|----------------------------|------|------|------|------|------|------|------|-----|------|-----|----------|
| Song, 2020                 | High | Low  | Low  | Low  | Low  | High | Low  | Low | Low  | Low | Moderate |
| Spiratos, 2021             | High | Low  | High | Low  | Low  | Low  | Low  | Low | Low  | Low | Moderate |
| Stewart et al., 2022       | Low  | Low | Low  | Low | Low      |
| Su & Sun, 2020             | High | Low  | High | Low  | Low  | Low  | Low  | Low | Low  | Low | Moderate |
| Tamarit et al., 2020       | Low  | Low  | High | High | Low  | Low  | Low  | Low | Low  | Low | Moderate |
| Tang & Pang, 2020          | High | Low  | High | High | Low  | Low  | Low  | Low | Low  | Low | Moderate |
| Tang & Ying, 2020          | High | Low  | High | High | Low  | High | Low  | Low | Low  | Low | Moderate |
| Tang et al., 2021          | High | Low  | Low  | Low  | Low  | Low  | Low  | Low | Low  | Low | Low      |
| Teker et al., 2021         | High | Low  | Low  | High | Low  | Low  | Low  | Low | Low  | Low | Moderate |
| Top et al., 2022           | High | Low  | High | High | High | Low  | Low  | Low | Low  | Low | Moderate |
| Türk et al., 2021          | High | Low  | High | High | Low  | High | Low  | Low | Low  | Low | Moderate |
| Ursache et al., 2022       | High | High | High | Low  | High | High | High | Low | Low  | Low | High     |
| Vaidya et al., 2022        | Low  | Low  | High | High | Low  | Low  | Low  | Low | Low  | Low | Moderate |
| Valero-Moreno et al., 2022 | High | Low  | High | High | Low  | Low  | Low  | Low | Low  | Low | Moderate |
| Villantini et al., 2022    | High | Low  | Low  | High | Low  | Low  | Low  | Low | Low  | Low | Moderate |
| Vivechana et al., 2021     | High | Low  | Low  | Low  | Low  | High | High | Low | High | Low | Moderate |
| Wang & Sun, 2020           | High | Low  | Low  | High | Low  | Low  | Low  | Low | Low  | Low | Moderate |
| Wang & Xu, 2020            | Low  | Low  | High | Low  | Low  | Low  | Low  | Low | Low  | Low | Low      |
| Wang et al., 2020a         | High | Low  | High | Low  | Low  | Low  | Low  | Low | Low  | Low | Moderate |
| Wang et al., 2020b         | High | Low  | High | High | Low  | Low  | Low  | Low | Low  | Low | Moderate |
| Wang et al., 2021a         | High | Low  | High | Low  | High | Low  | Low  | Low | Low  | Low | Moderate |
| Wang et al., 2021b         | High | Low  | High | Low  | High | High | Low  | Low | Low  | Low | Moderate |
| Wang et al., 2022a         | High | Low  | High | Low  | Low  | Low  | Low  | Low | Low  | Low | Moderate |
| Wang et al., 2022b         | High | High | High | Low  | Low  | Low  | Low  | Low | Low  | Low | Moderate |
| Wearick-Silva et al., 2021 | High | Low  | High | High | High | Low  | Low  | Low | Low  | Low | Moderate |
| Wen et al., 2022           | High | Low  | High | Low  | Low  | Low  | Low  | Low | Low  | Low | Moderate |
| Wesley et al., 2022        | High | Low  | High | High | Low  | Low  | Low  | Low | Low  | Low | Moderate |
| Windiani et al., 2021      | High | Low  | High | High | Low  | Low  | Low  | Low | Low  | Low | Moderate |
| Xie et al., 2020           | High | Low  | High | Low  | Low  | Low  | Low  | Low | Low  | Low | Moderate |
| Xie et al., 2022           | High | Low  | High | Low  | Low  | Low  | Low  | Low | Low  | Low | Moderate |
| Xu et al., 2021            | High | Low  | High | High | Low  | Low  | Low  | Low | Low  | Low | Moderate |
| Xu et al., 2022            | High | Low  | Low  | Low  | Low  | Low  | Low  | Low | Low  | Low | Low      |
| Xue et al., 2021           | High | Low  | High | High | Low  | Low  | Low  | Low | Low  | Low | Moderate |
| Yakşi et al., 2021         | High | Low  | Low  | Low  | Low  | Low  | Low  | Low | Low  | Low | Low      |
| Yin et al., 2022           | High | Low  | Low  | High | Low  | Low  | Low  | Low | Low  | Low | Moderate |
| Yu et al., 2020            | High | Low  | Low  | High | Low  | High | High | Low | Low  | Low | Moderate |
| Yue et al., 2020           | High | Low  | Low  | High | Low  | Low  | Low  | Low | Low  | Low | Moderate |
| Zainel et al., 2021        | Low  | High | Low  | High | Low  | High | Low  | Low | Low  | Low | Moderate |
| Zhai et al., 2021          | High | Low  | High | High | Low  | Low  | Low  | Low | Low  | Low | Moderate |
| Zhan et al., 2022          | High | Low  | High | High | Low  | Low  | Low  | Low | Low  | Low | Moderate |
| Zhang et al., 2020a        | High | Low  | High | Low  | Low  | Low  | Low  | Low | Low  | Low | Moderate |
| Zhang et al., 2020b        | High | Low  | Low  | Low  | Low  | Low  | Low  | Low | Low  | Low | Low      |
| Zhang et al., 2020c        | High | Low  | High | High | Low  | Low  | Low  | Low | Low  | Low | Moderate |
| Zhang et al., 2020d        | High | Low  | High | Low  | Low  | Low  | Low  | Low | Low  | Low | Moderate |
| Zhang et al., 2021         | High | Low  | Low  | High | Low  | Low  | Low  | Low | Low  | Low | Moderate |
| Zhang et al., 2022         | High | Low  | High | High | Low  | Low  | Low  | Low | Low  | Low | Moderate |

|                    |      |     |      |      |     |      |      |     |     |     |          |
|--------------------|------|-----|------|------|-----|------|------|-----|-----|-----|----------|
| Zhao et al., 2022  | High | Low | Low  | Low  | Low | Low  | Low  | Low | Low | Low | Low      |
| Zhen et al., 2022  | High | Low | Low  | High | Low | Low  | Low  | Low | Low | Low | Moderate |
| Zhong et al., 2021 | High | Low | High | High | Low | Low  | Low  | Low | Low | Low | Moderate |
| Zhou et al., 2020a | Low  | Low | High | Low  | Low | Low  | Low  | Low | Low | Low | Low      |
| Zhou et al., 2020b | Low  | Low | High | Low  | Low | Low  | Low  | Low | Low | Low | Low      |
| Zhou et al., 2020c | Low  | Low | High | Low  | Low | Low  | Low  | Low | Low | Low | Low      |
| Zhou et al., 2020d | High | Low | High | High | Low | High | High | Low | Low | Low | High     |
| Zhou et al., 2021  | High | Low | Low  | High | Low | Low  | Low  | Low | Low | Low | Moderate |
| Zhu et al., 2020   | High | Low | Low  | Low  | Low | Low  | Low  | Low | Low | Low | Low      |
| Zhu et al., 2021   | High | Low | Low  | High | Low | Low  | Low  | Low | Low | Low | Moderate |

## Domain Interpretation<sup>1</sup>

| Domain                                 | Risk of Bias Item                                                                                                      |
|----------------------------------------|------------------------------------------------------------------------------------------------------------------------|
| <b>Assessment of External Validity</b> |                                                                                                                        |
| <b>A</b>                               | Was the study's target population a close representation of the national population in relation to relevant variables? |
| <b>B</b>                               | Was the sampling frame a true or close representation of the target population?                                        |
| <b>C</b>                               | Was some form of random selection used to select the sample, OR was a census undertaken?                               |
| <b>D</b>                               | Was the likelihood of nonresponse bias minimal?                                                                        |
| <b>Assessment of Internal Validity</b> |                                                                                                                        |
| <b>E</b>                               | Were data collected directly from the subjects (as opposed to a proxy)?                                                |
| <b>F</b>                               | Was an acceptable case definition used in the study?                                                                   |
| <b>G</b>                               | Was the study instrument that measured the parameter of interest shown to have validity and reliability?               |
| <b>H</b>                               | Was the same mode of data collection used for all subjects?                                                            |
| <b>I</b>                               | Was the length of the shortest prevalence period for the parameter of interest appropriate?                            |
| <b>J</b>                               | Were the numerator(s) and denominator(s) for the parameter of interest appropriate?                                    |

## Supplementary References

1. Hoy D, Brooks P, Woolf A, et al. Assessing risk of bias in prevalence studies: modification of an existing tool and evidence of interrater agreement. *J Clin Epidemiol.* 2012;65(9):934-939.
